# Supplementary material for: Deciphering the Developmental Dynamics of the Mouse Liver Transcriptome
Source: PLOS journal article supplement (doi:10.1371/journal.pone.0141220), 2015-10-23

# Supplemental Methods

# Gene Expression

---

- Gene expression is measured in FPKM (fragments per kilobase of exon per million fragments mapped)

$$\text{FPKM} = \frac{\text{number of reads in region}}{\frac{\text{total reads}}{1000000}} \times \frac{\text{region length}}{1000}$$

(Mortazavi et al. Nature Methods, 2008)

- The population distribution of FPKM data can be described by a Poisson probability distribution
- Presence of Extra-Poisson variation
  - Effects standard error
  - Effects p-values

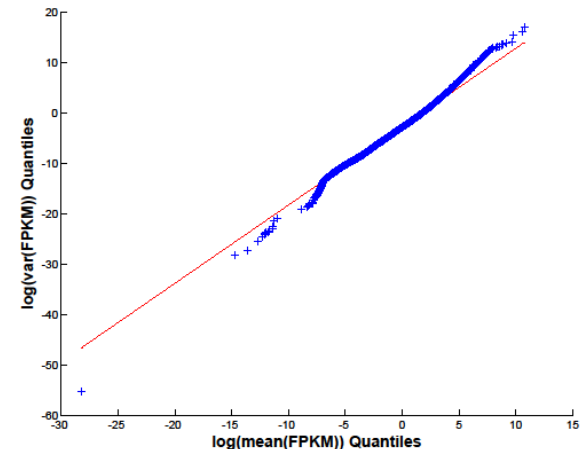

# Measuring Significance of Gene Expression

- Fit a Poisson log-linear model that permits extra-Poisson variation

$$\mu\{Y_i\} = \mu_i$$

$$\text{Var}\{Y_i\} = \psi\mu_i$$

$$\log(\mu_i) = \beta$$

Dispersion parameter

- The dispersion parameter accounts for extra-Poisson variation
- If the variance is like Poisson variance, then  $\psi=1$
- Maximum likelihood estimates of  $\beta$ 
  - Provides significance estimates of parameters
- Adjust for multiple hypothesis testing
  - Benjamini–Hochberg procedure

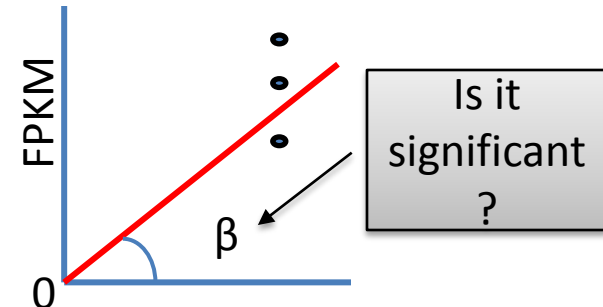

# Quasi-Likelihood Approach

---

- The standard errors of the maximum quasi-likelihood estimates are  $\sqrt{\hat{\Psi}}$  times the standard errors of the maximum likelihood estimates.
- Considers both the size and variation in expression in determining significance.
- Tries to answer the question: how different is the observed expression from the background (no expression).

Select genes expressed significantly (FDR  $\leq$  0.05) in at least one of the 12 ages

9945 genes with significant expression in at least one age

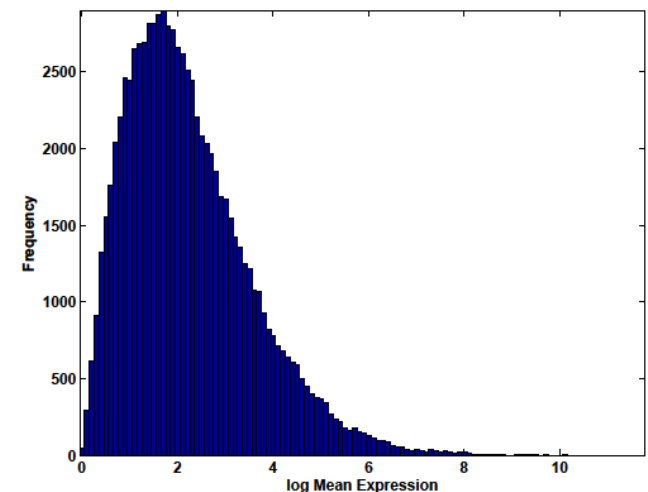

# Measuring Significant Differential Expression

- Is the gene expressed differently in the different ages?
- Fit a Poisson-log-linear regression model
- Use the Drop-in-Deviance F-Test (Accounts for extra-Poisson variation)

$$\log(\mu_i) = \beta_0 + \beta_i AGE_i \quad \text{Full model}$$

$$\log(\mu_i) = \beta_0 \quad \text{Reduced model}$$

$$F\text{-stat} = \frac{\text{Drop in deviance} / \text{Drop in d.f.}}{\hat{\psi}}$$

$\hat{\psi}$  ←

$$\text{Dispersion parameter} = \frac{\text{Deviance}}{\text{Degrees of freedom}}$$

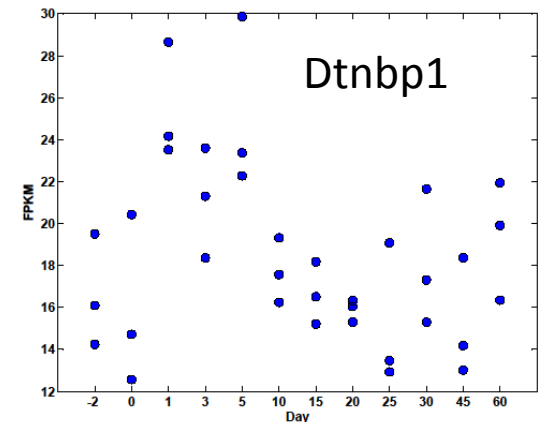

- Adjust for multiple hypothesis testing
  - Benjamini–Hochberg procedure

# How Many Factors to Select

- Use subjective judgment by observing the data.
- Examine the Scree plot of the eigenvalues from principal component analysis.
- Perform a Parallel Analysis to determine the number of factors to retain.
- Retained 3 factors based on these guides.

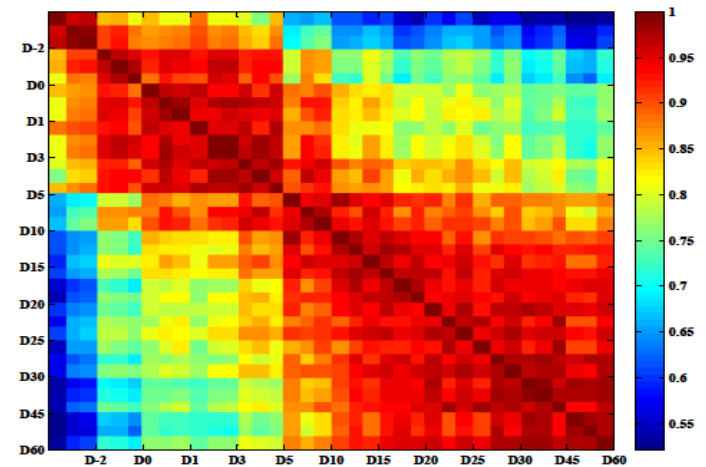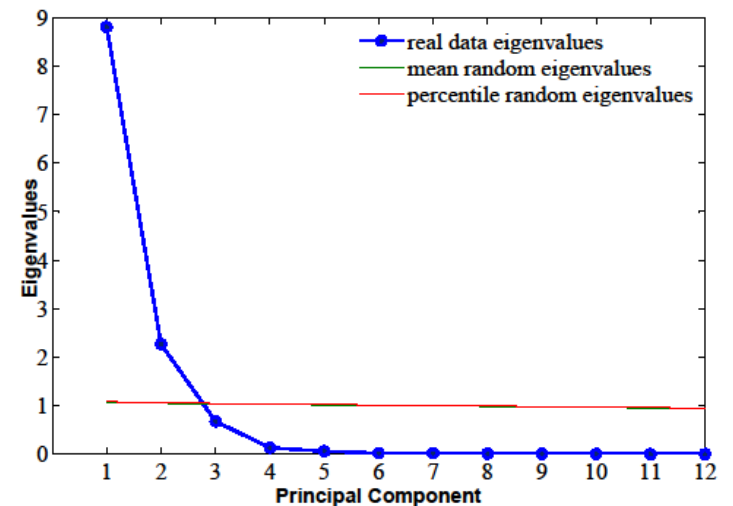

Supplement: S6 (10.1371/journal.pone.0141220.s006) [file journal.pone.0141220.s006]
