# Supplementary material for: Deciphering the Developmental Dynamics of the Mouse Liver Transcriptome
Source: PubMed Central journal article supplement (PMC4619800; doi:10.1371/journal.pone.0141220), 2015-10-23

| <u>Page</u> | <u>Gene</u>          | <u>Transcripts</u>                                            |
|-------------|----------------------|---------------------------------------------------------------|
| 3           | <b>1700019G17Rik</b> | NM_001145895,NM_029331                                        |
| 4           | <b>2810007J24Rik</b> | NM_001199306,NM_175250                                        |
| 5           | <b>5133401N09Rik</b> | NM_001048060,NM_198004                                        |
| 6           | <b>Acot7</b>         | NM_001146057,NM_133348                                        |
| 7           | <b>Acp5</b>          | NM_001102404,NM_001102405,NM_007388                           |
| 8           | <b>Add1</b>          | NM_001024458,NM_001102444,NM_013457                           |
| 9           | <b>Anapc11</b>       | NM_001038230,NM_025389                                        |
| 10          | <b>Anapc5</b>        | NM_001042491,NM_021505                                        |
| 11          | <b>Aplp2</b>         | NM_001102455,NM_009691                                        |
| 12          | <b>Apoc1</b>         | NM_001110009,NM_007469                                        |
| 13          | <b>Arap1</b>         | NM_001040111,NM_001040112                                     |
| 14          | <b>Atp5g1</b>        | NM_001161419,NM_007506                                        |
| 15          | <b>Bscl2</b>         | NM_001136064,NM_008144                                        |
| 16          | <b>Cbs</b>           | NM_144855,NM_178224                                           |
| 17          | <b>Ccnd3</b>         | NM_001081635,NM_001081636,NM_007632                           |
| 18          | <b>Cdipt</b>         | NM_026638,NM_138754                                           |
| 19          | <b>Comt</b>          | NM_001111062,NM_001111063,NM_007744                           |
| 20          | <b>Cuta</b>          | NM_026307,NM_026948                                           |
| 21          | <b>Cyth1</b>         | NM_001112699,NM_001112700                                     |
| 22          | <b>Dapk3</b>         | NM_001190473,NM_001190474                                     |
| 23          | <b>Dcaf11</b>        | NM_001199009,NM_133734,NR_037572                              |
| 24          | <b>Egfl7</b>         | NM_001164564,NM_178444,NM_198724,NM_198725                    |
| 25          | <b>Egfr</b>          | NM_007912,NM_207655                                           |
| 26          | <b>Elovl1</b>        | NM_001039176,NM_019422                                        |
| 27          | <b>Eng</b>           | NM_001146348,NM_007932                                        |
| 28          | <b>Fis1</b>          | NM_001163243,NM_025562                                        |
| 29          | <b>Fiz1</b>          | NM_001110328,NM_001110329                                     |
| 30          | <b>Fkbp8</b>         | NM_001111066,NM_001199631,NM_010223                           |
| 31          | <b>Gcdh</b>          | NM_001044744,NM_008097                                        |
| 32          | <b>Gorasp2</b>       | NM_027352,NR_027343                                           |
| 33          | <b>Gpr146</b>        | NM_001038703,NM_030258                                        |
| 34          | <b>Gpr56</b>         | NM_001198894,NM_018882                                        |
| 35          | <b>H2afy</b>         | NM_001159513,NM_001159514,NM_001159515,NM_012015              |
| 36          | <b>Hmbs</b>          | NM_001110251,NM_013551                                        |
| 37          | <b>Hras1</b>         | NM_001130443,NM_008284                                        |
| 38          | <b>Ifi2711</b>       | NM_026790,NM_194067,NM_194068,NM_194069                       |
| 39          | <b>Ifnar2</b>        | NM_001110498,NM_010509                                        |
| 40          | <b>Il11ra1</b>       | NM_001163401,NM_010549                                        |
| 41          | <b>Insig2</b>        | NM_133748,NM_178082                                           |
| 42          | <b>Ivns1abp</b>      | NM_001039511,NM_054102                                        |
| 43          | <b>Kng1</b>          | NM_001102411,NM_001102412,NM_023125                           |
| 44          | <b>Ldb1</b>          | NM_001113408,NM_010697                                        |
| 45          | <b>Ldha</b>          | NM_001136069,NM_010699                                        |
| 46          | <b>Lrch4</b>         | NM_001168652,NM_146164                                        |
| 47          | <b>Lrrc8d</b>        | NM_001122768,NM_178701                                        |
| 48          | <b>Ly6e</b>          | NM_001164036,NM_001164038,NM_001164039,NM_001164040,NM_008529 |
| 49          | <b>Mars</b>          | NM_001003913,NM_001171582                                     |
| 50          | <b>Masp2</b>         | NM_001003893,NM_010767                                        |
| 51          | <b>Mcf2</b>          | NM_139295,NM_176808                                           |
| 52          | <b>Mid1ip1</b>       | NM_001166635,NM_026524                                        |

|    |                 |                                                  |
|----|-----------------|--------------------------------------------------|
| 53 | <b>Mpst</b>     | NM_001162492,NM_001162493,NM_138670              |
| 54 | <b>Mtus1</b>    | NM_001005863,NM_001005865                        |
| 55 | <b>Nadk</b>     | NM_001159637,NM_138671                           |
| 56 | <b>Ndrg2</b>    | NM_001145959,NM_013864                           |
| 57 | <b>Ndufv3</b>   | NM_001083891,NM_030087                           |
| 58 | <b>Nfe2l1</b>   | NM_001130450,NM_008686                           |
| 59 | <b>Nme2</b>     | NM_001077529,NM_008705                           |
| 60 | <b>Nr1h3</b>    | NM_001177730,NM_013839                           |
| 61 | <b>Pacsin2</b>  | NM_001159509,NM_011862                           |
| 62 | <b>Pcx</b>      | NM_001162946,NM_008797                           |
| 63 | <b>Pfkm</b>     | NM_001163487,NM_001163488                        |
| 64 | <b>Pklr</b>     | NM_001099779,NM_013631                           |
| 65 | <b>Pnkd</b>     | NM_019999,NM_025580                              |
| 66 | <b>Ppp2r5c</b>  | NM_001081457,NM_001081458,NM_001135001           |
| 67 | <b>Pqlc1</b>    | NM_001164420,NM_001164421,NM_025861              |
| 68 | <b>Prkd3</b>    | NM_001171004,NM_001171005                        |
| 69 | <b>Psen2</b>    | NM_001128605,NM_011183                           |
| 70 | <b>Ptk2b</b>    | NM_001162365,NM_172498                           |
| 71 | <b>Ptpn6</b>    | NM_001077705,NM_013545                           |
| 72 | <b>Puf60</b>    | NM_001164600,NM_028364,NM_133691                 |
| 73 | <b>Rab43</b>    | NM_001039394,NM_133717                           |
| 74 | <b>Rnf14</b>    | NM_001164622,NM_020012                           |
| 75 | <b>Rnh1</b>     | NM_001172100,NM_001172101,NM_145135              |
| 76 | <b>Rtn4</b>     | NM_024226,NM_194052                              |
| 77 | <b>Sh3bp2</b>   | NM_001145858,NM_011893                           |
| 78 | <b>Shisa5</b>   | NM_025858,NM_026381                              |
| 79 | <b>Slc11a2</b>  | NM_001146161,NM_008732                           |
| 80 | <b>Slc29a1</b>  | NM_001199113,NM_001199115,NM_001199116,NM_022880 |
| 81 | <b>Slc38a3</b>  | NM_001199217,NM_001199218,NM_023805              |
| 82 | <b>Slc3a2</b>   | NM_001161413,NM_008577                           |
| 83 | <b>Sphk2</b>    | NM_020011,NM_203280                              |
| 84 | <b>Stat5b</b>   | NM_001113563,NM_011489                           |
| 85 | <b>Suds3</b>    | NM_001122666,NM_178622                           |
| 86 | <b>Tcf25</b>    | NM_001037877,NM_001037878,NM_025804              |
| 87 | <b>Timd2</b>    | NM_001161355,NM_134249                           |
| 88 | <b>Tmbim6</b>   | NM_001171034,NM_001171035,NM_001171036,NM_026669 |
| 89 | <b>Tmem176b</b> | NM_001164207,NM_001164208,NM_001164209,NM_023056 |
| 90 | <b>Tsen34</b>   | NM_001164204,NM_024168                           |
| 91 | <b>Wars</b>     | NM_001164314,NM_011710                           |
| 92 | <b>Xrcc6bp1</b> | NM_001159559,NM_026858                           |

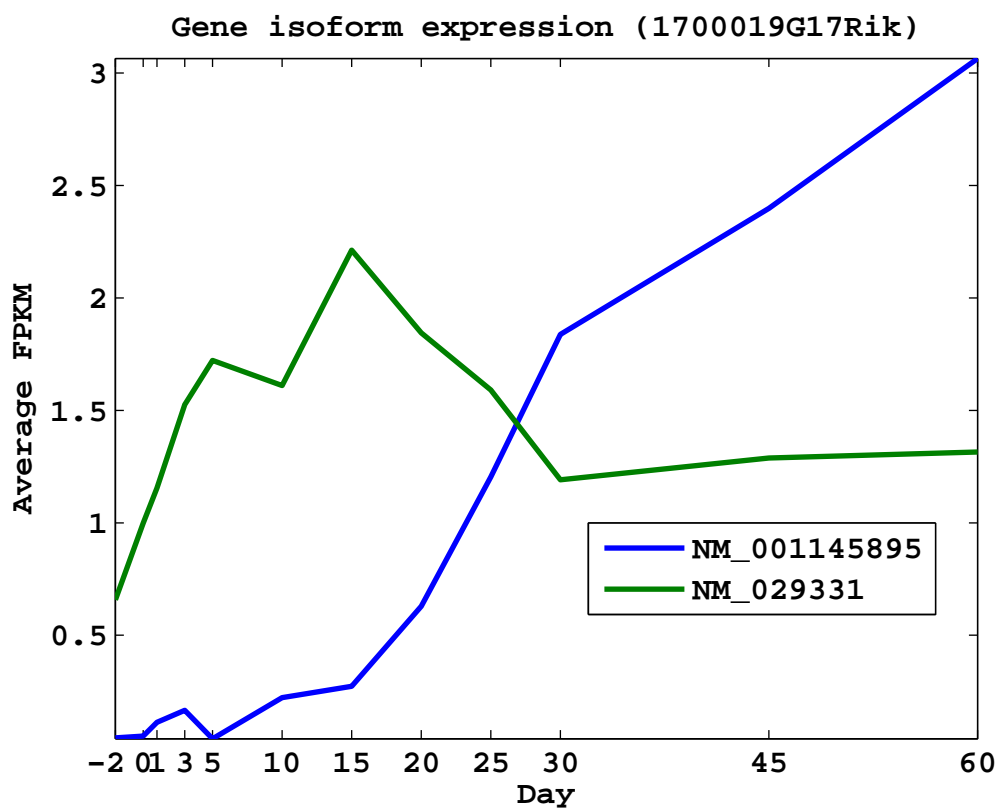

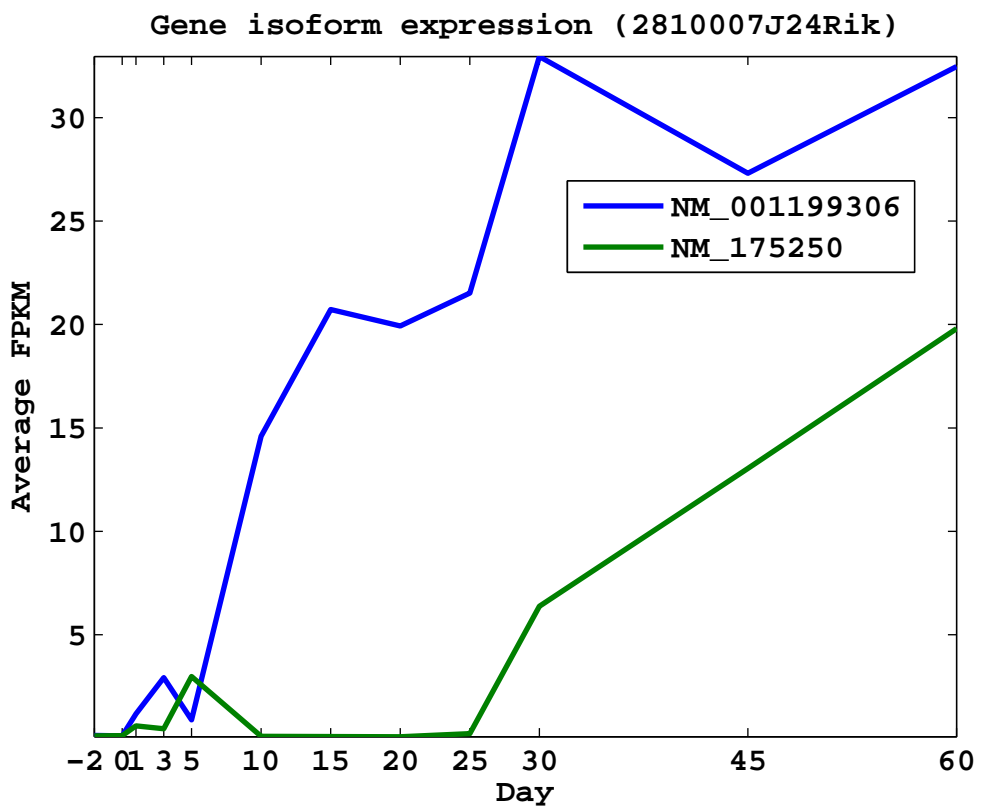

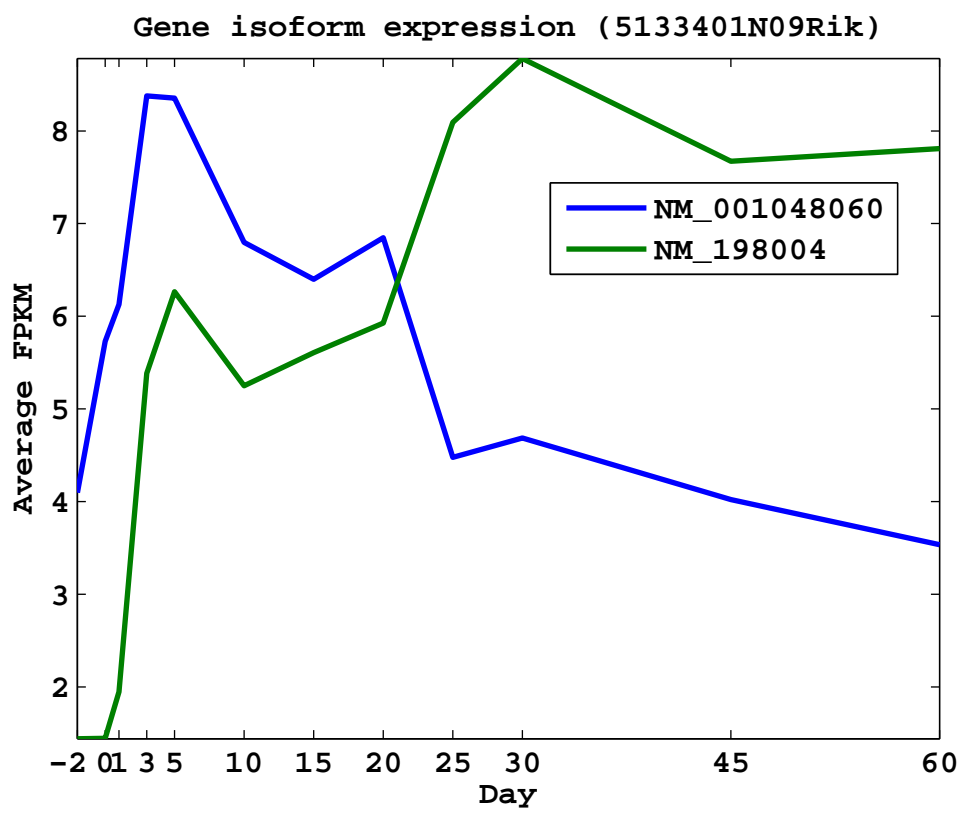

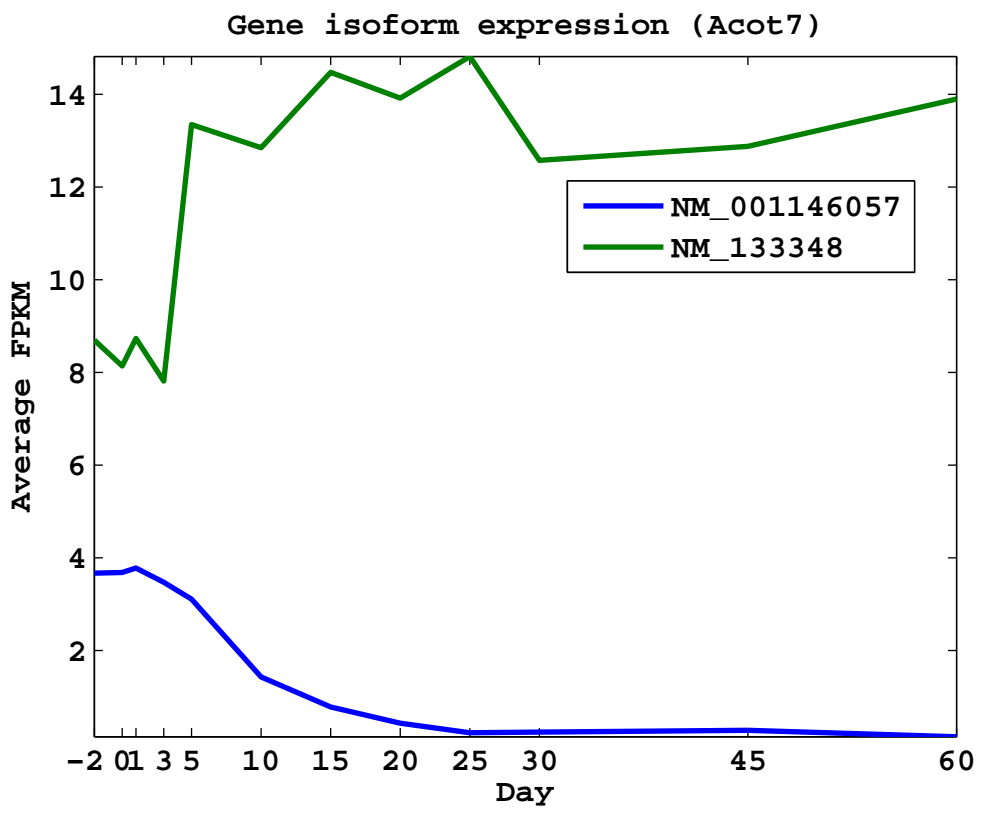

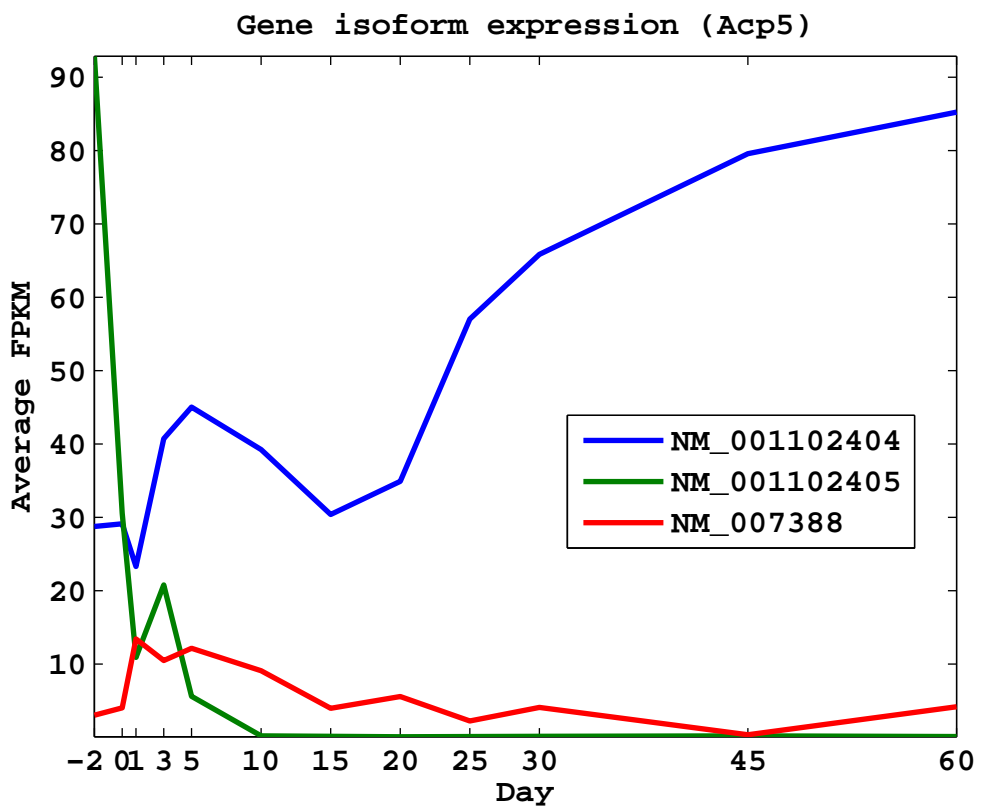

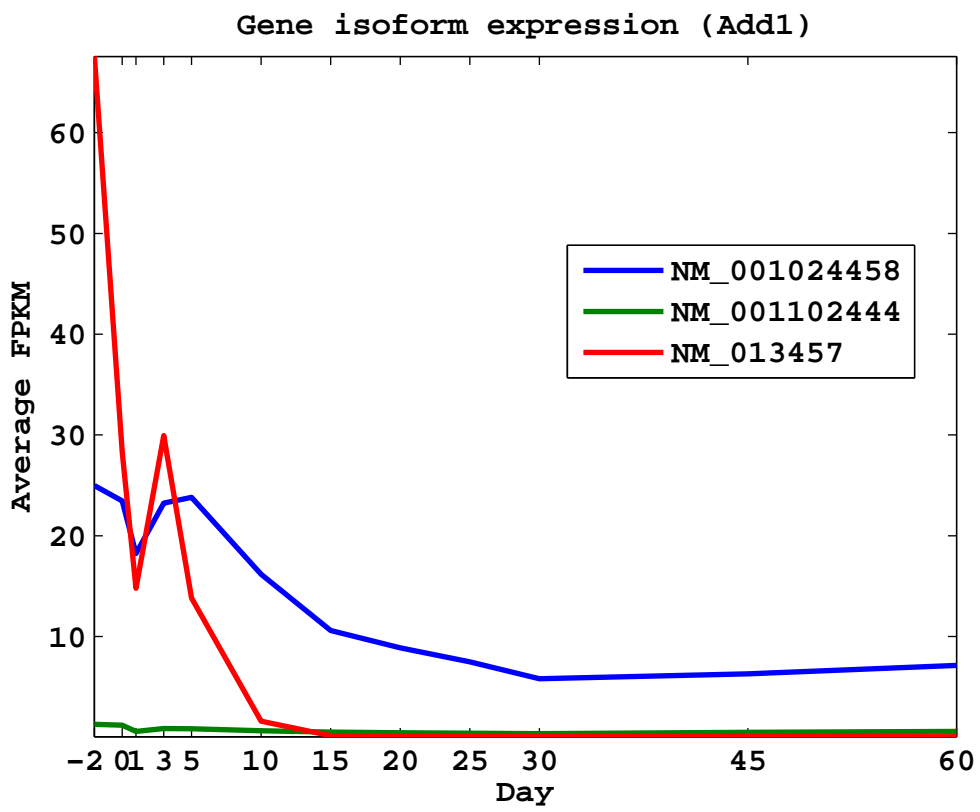



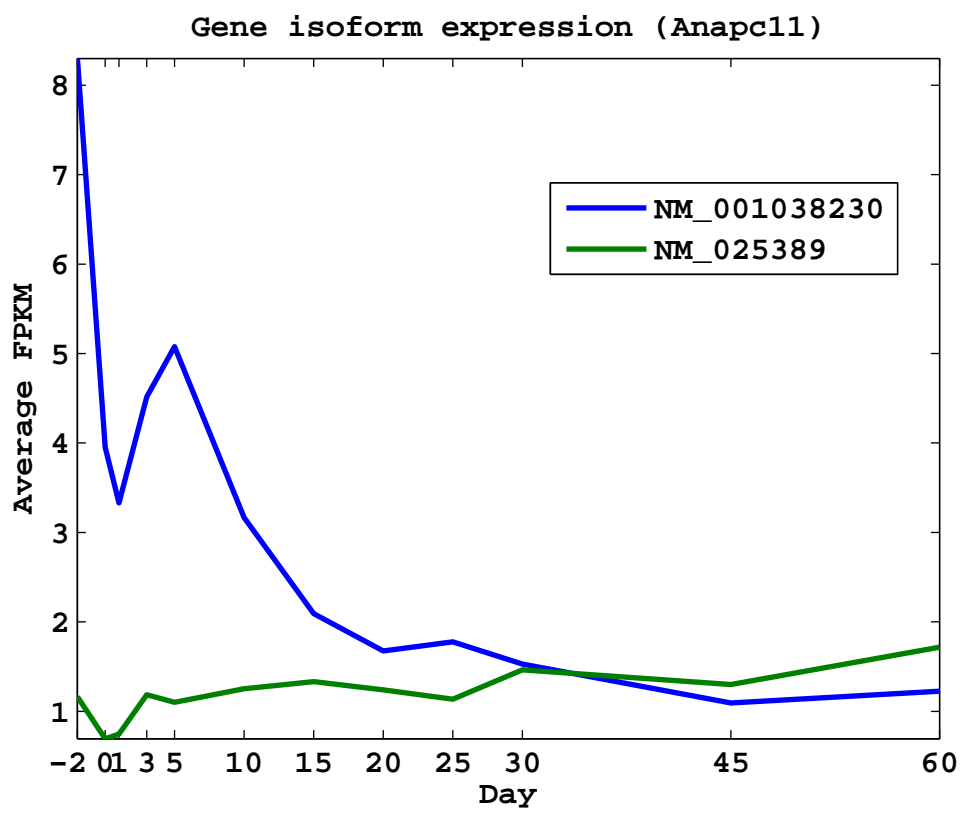

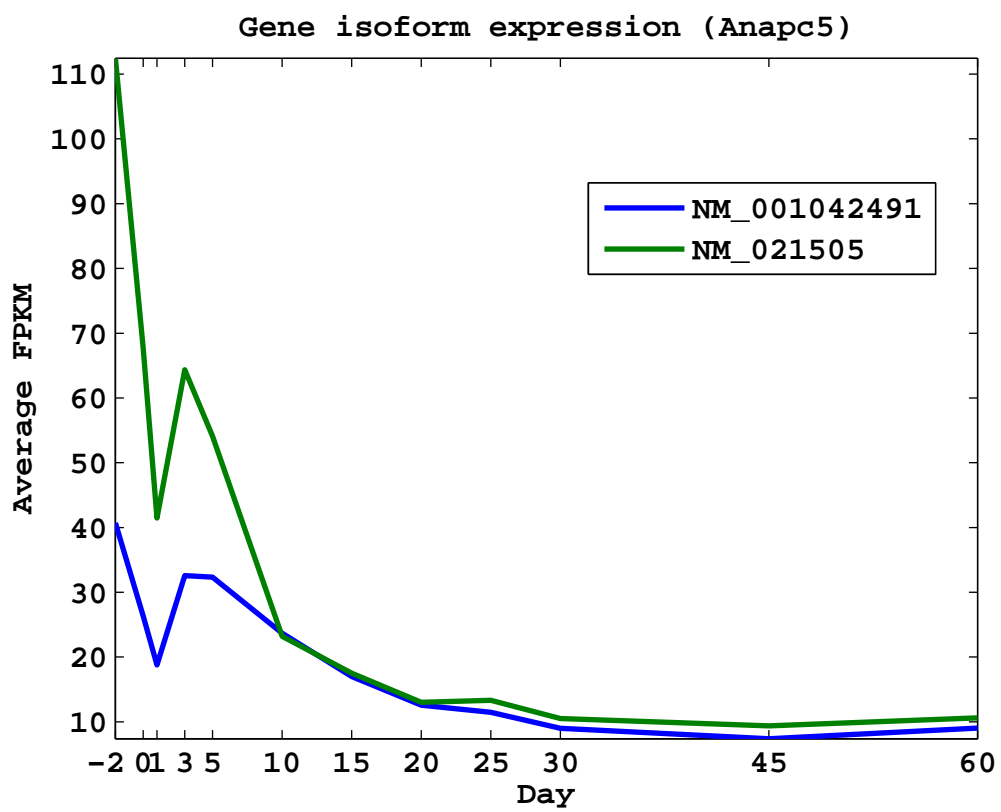

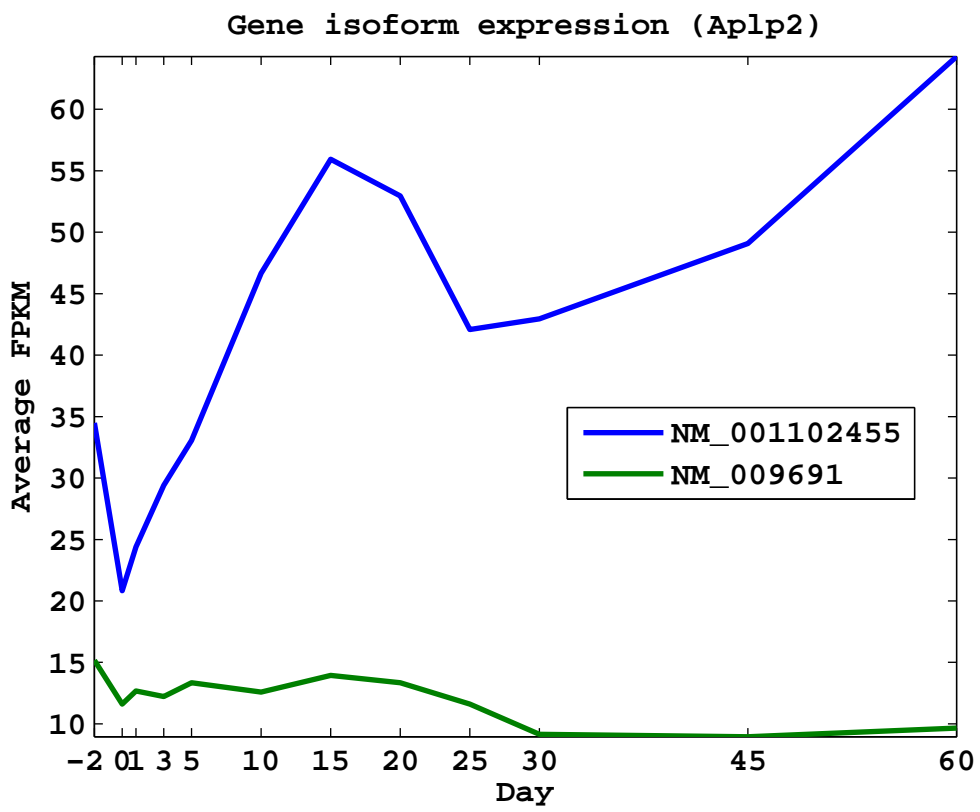

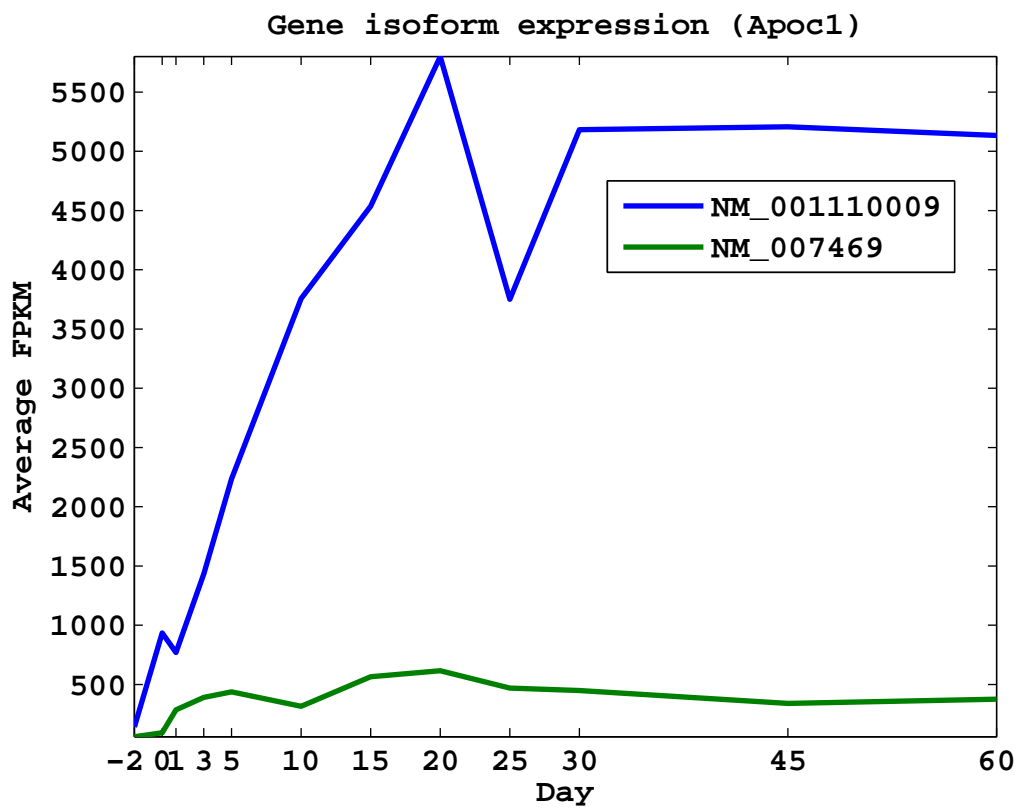

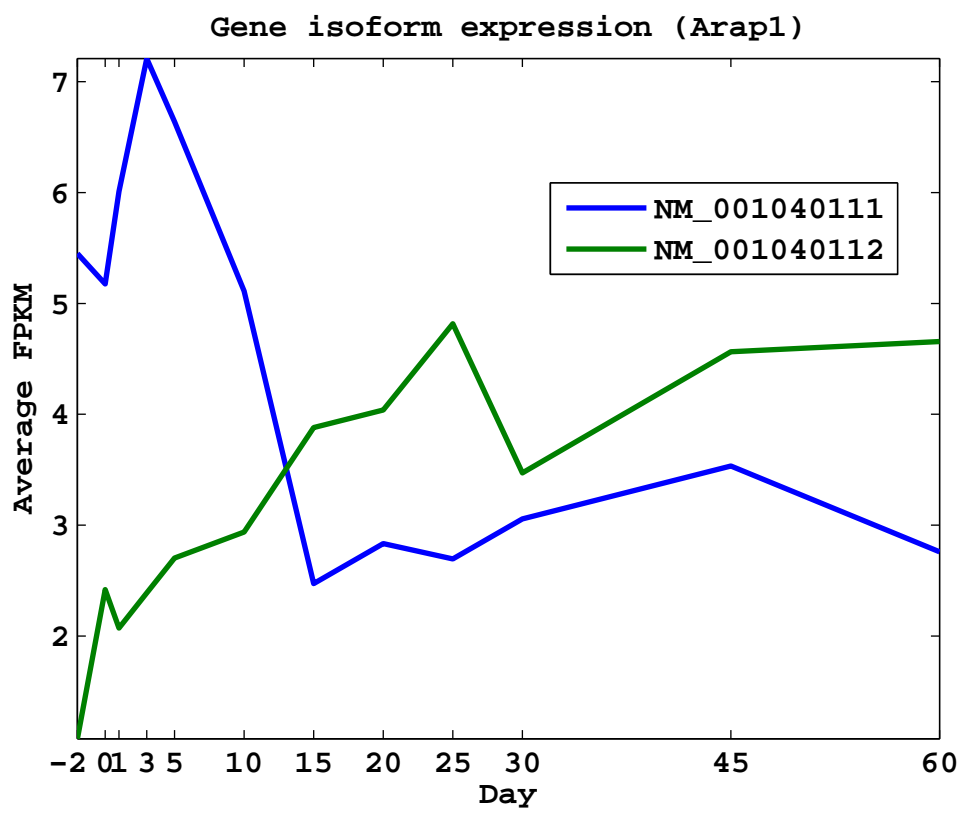

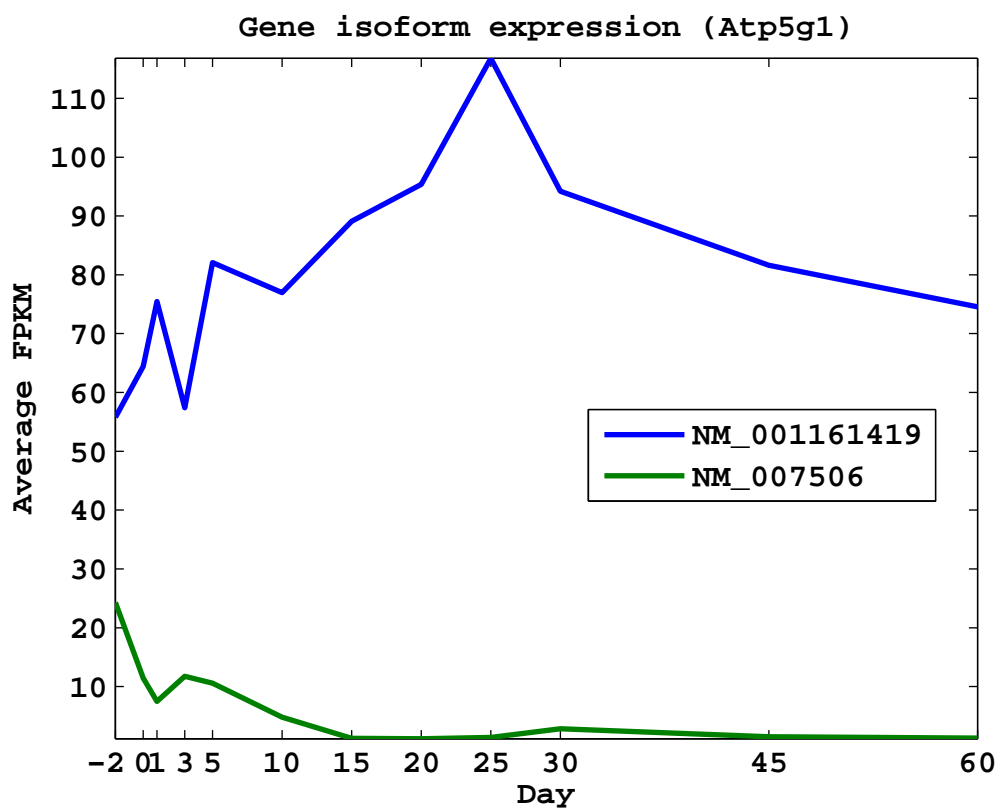

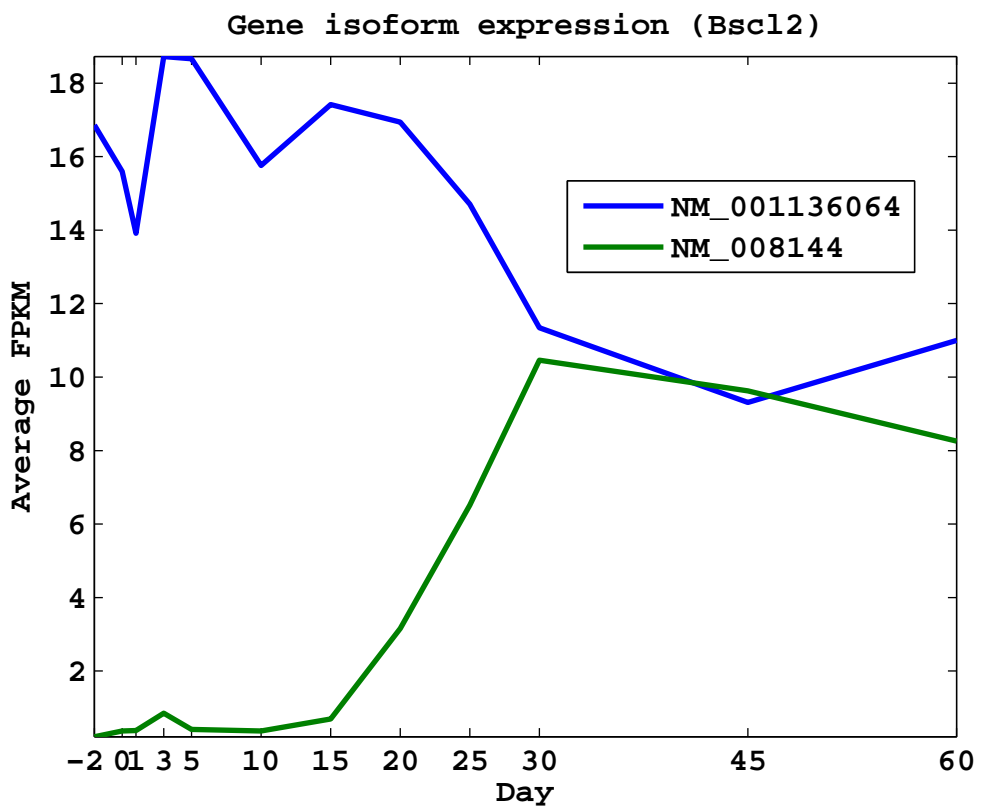

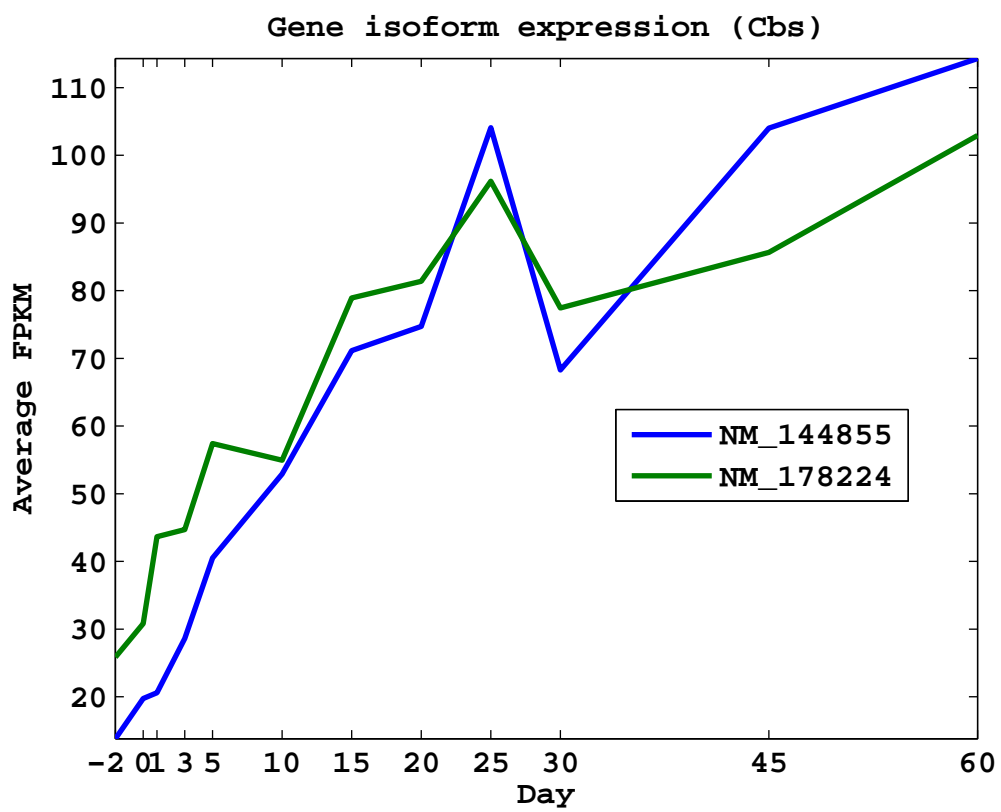



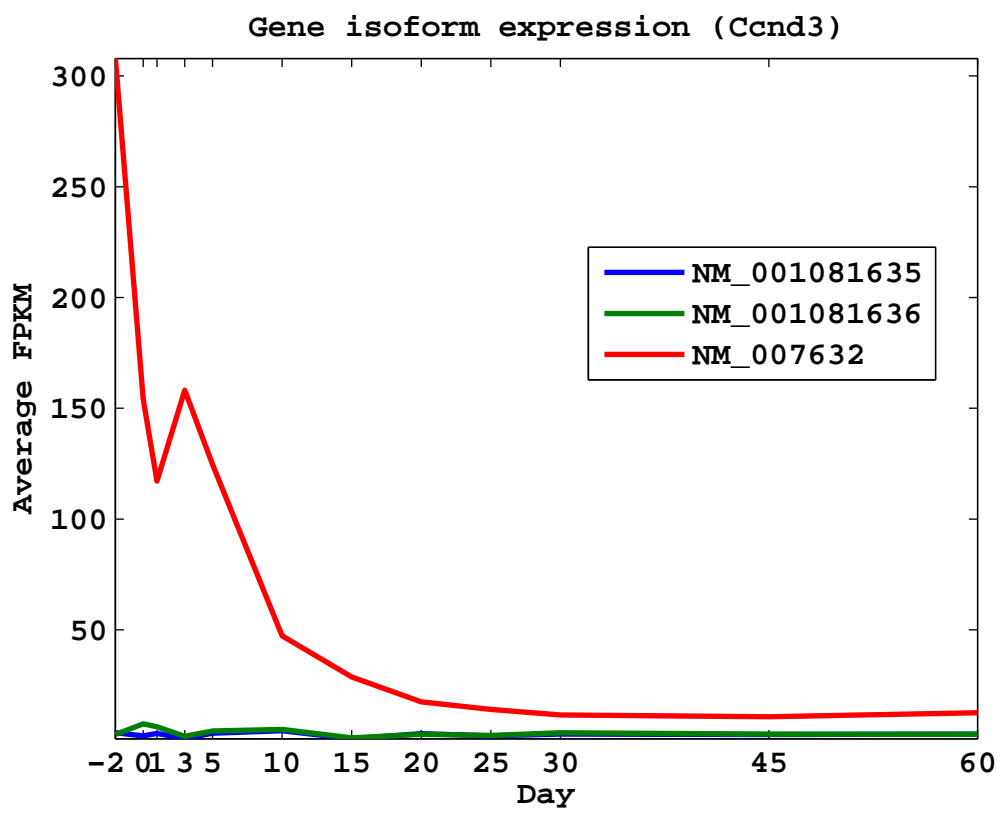

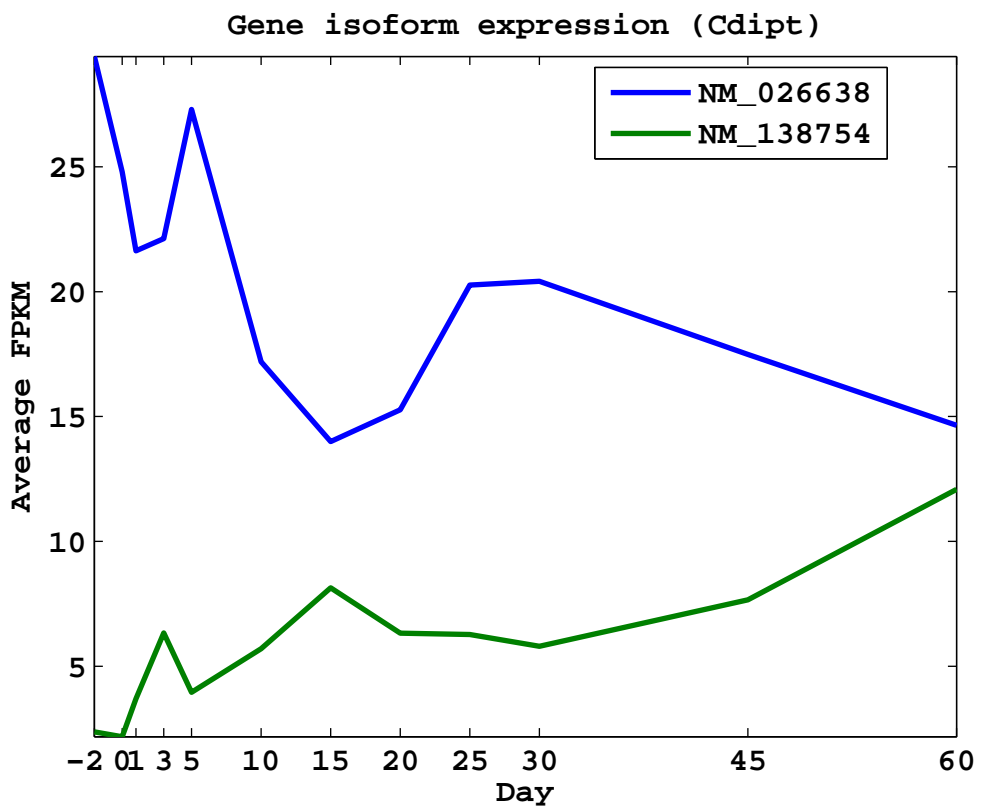

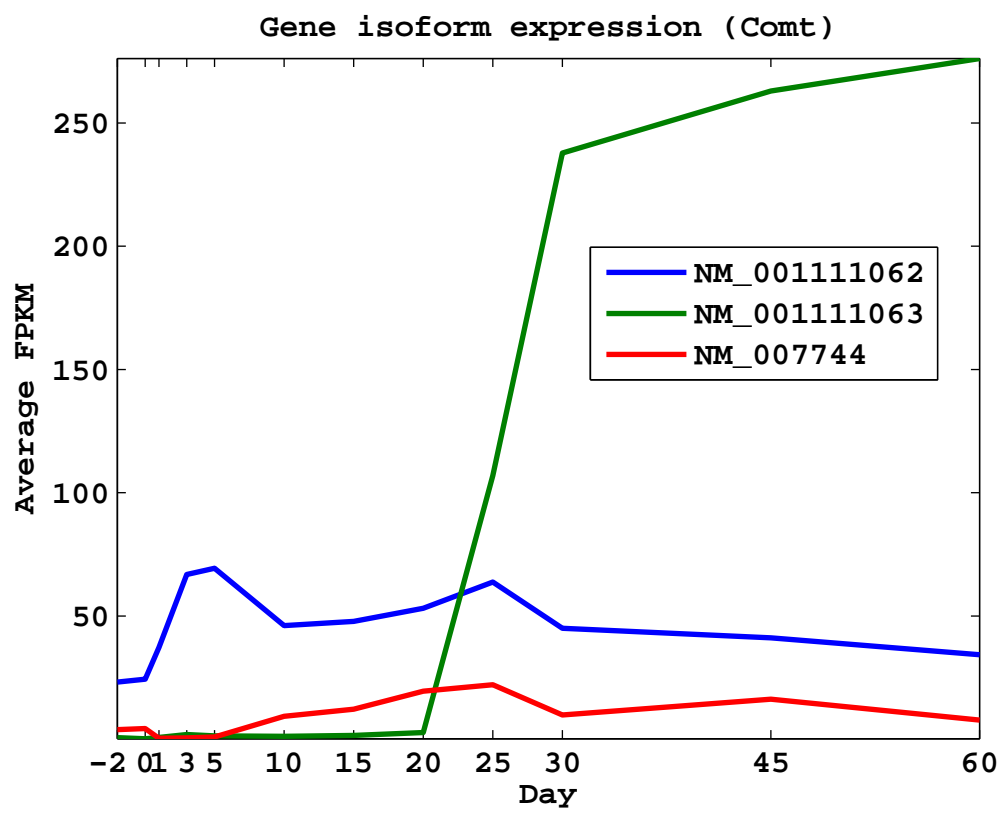

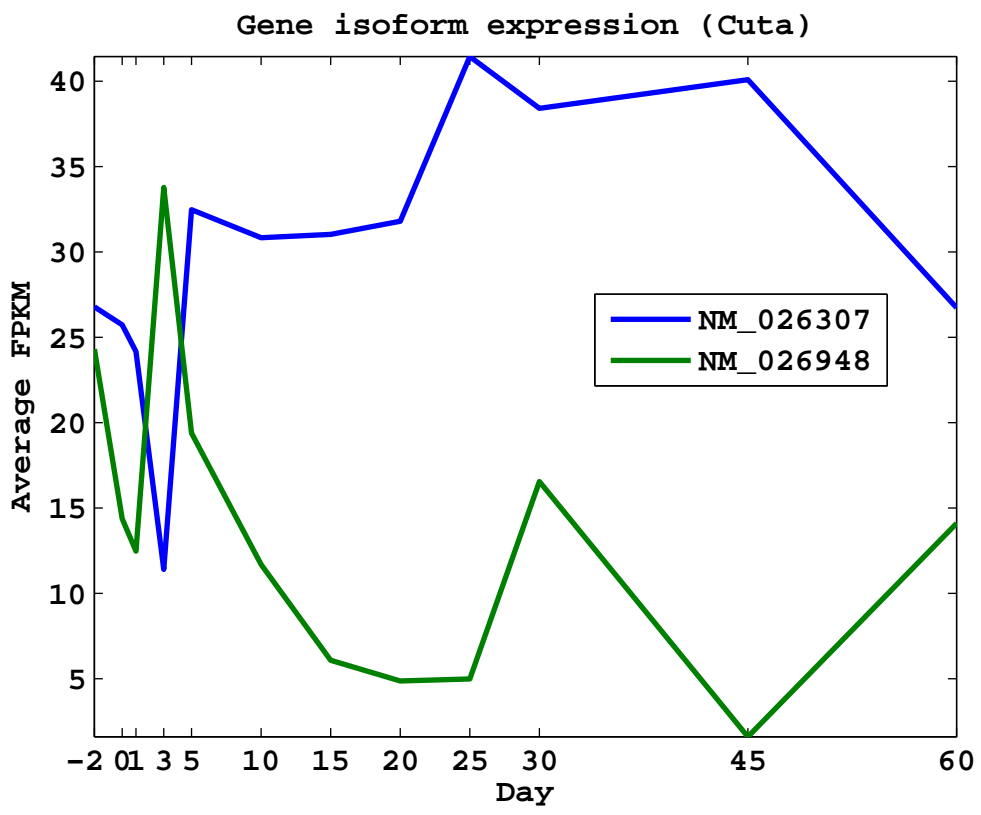

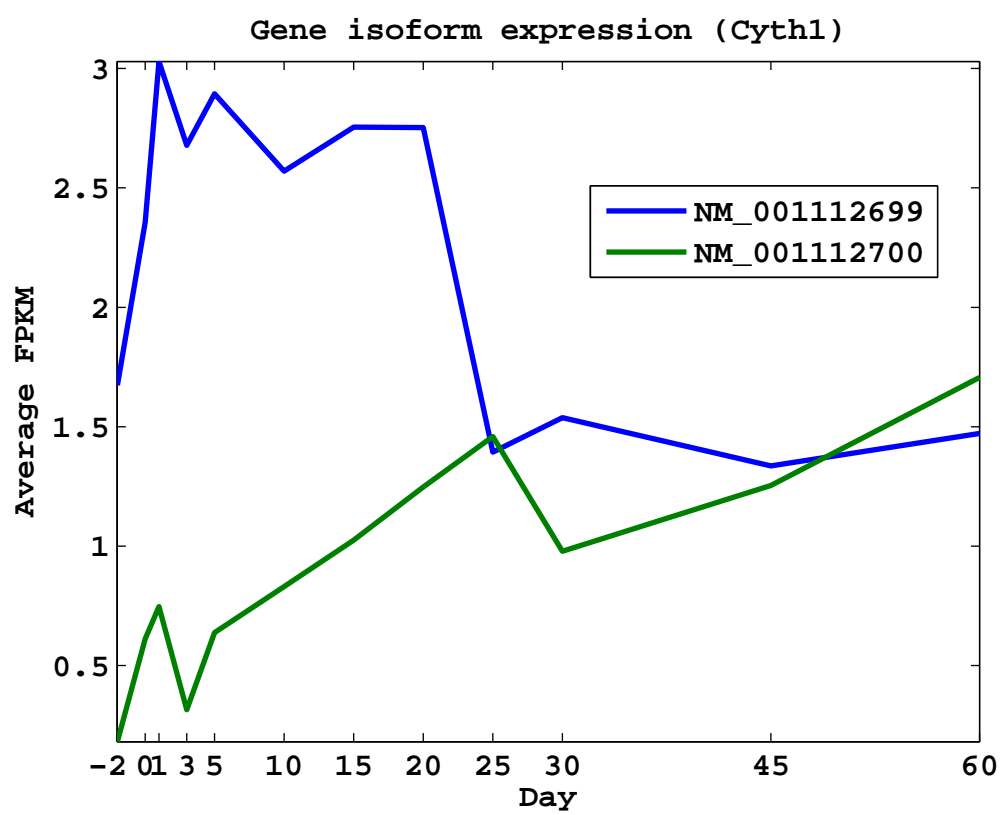

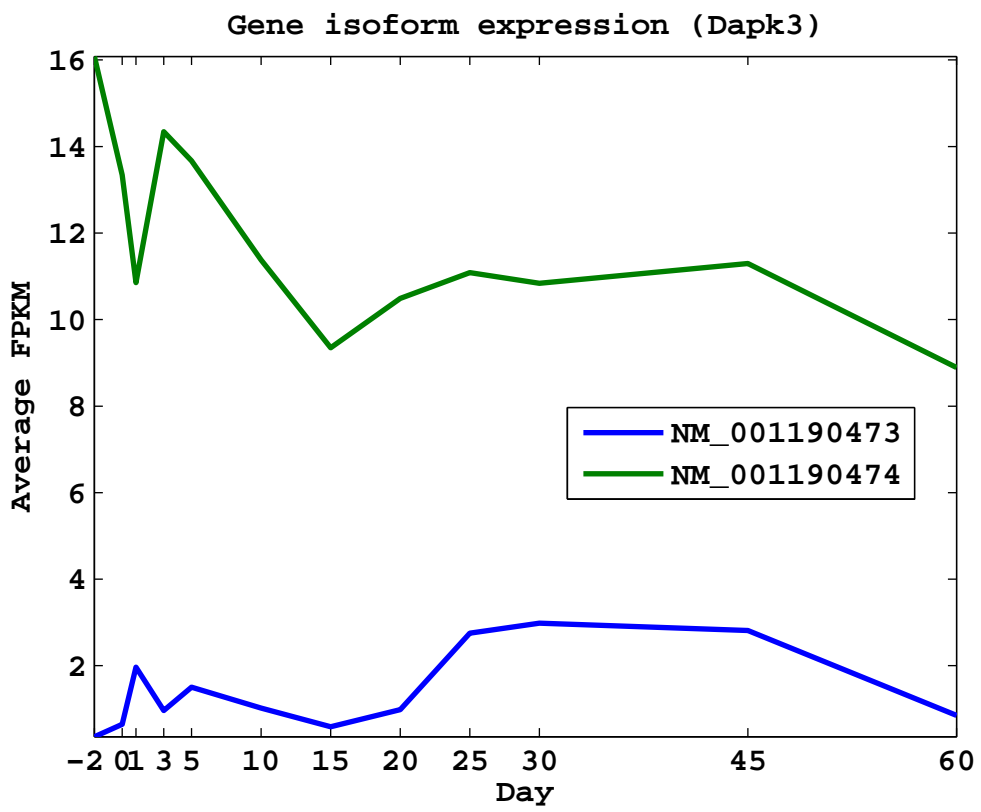

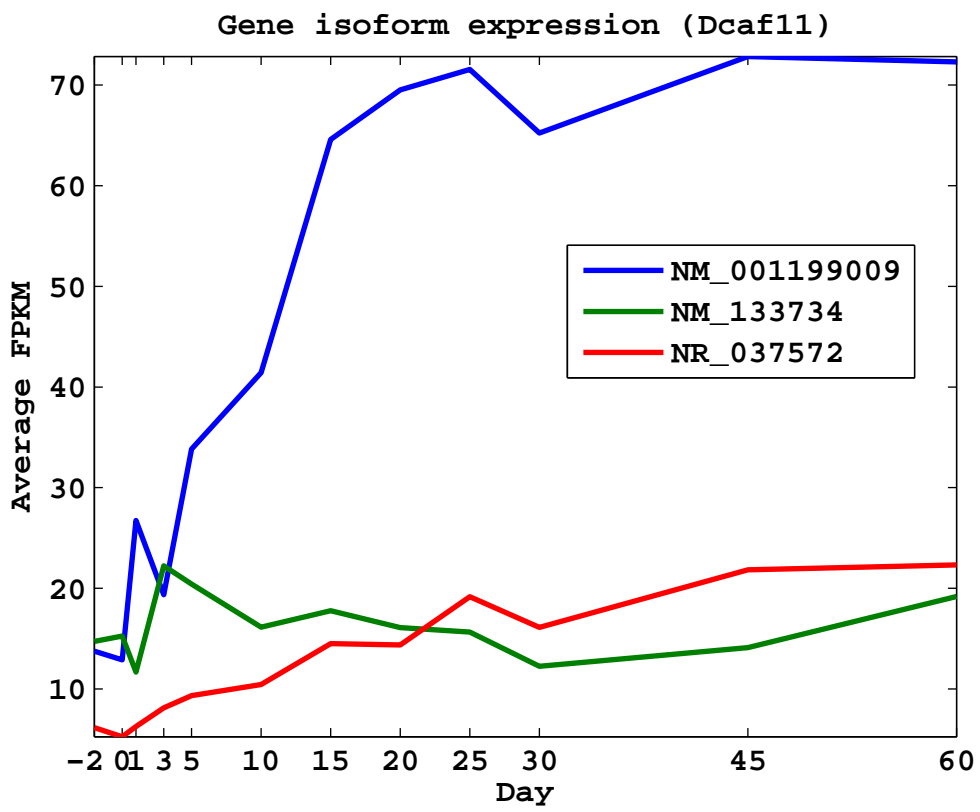

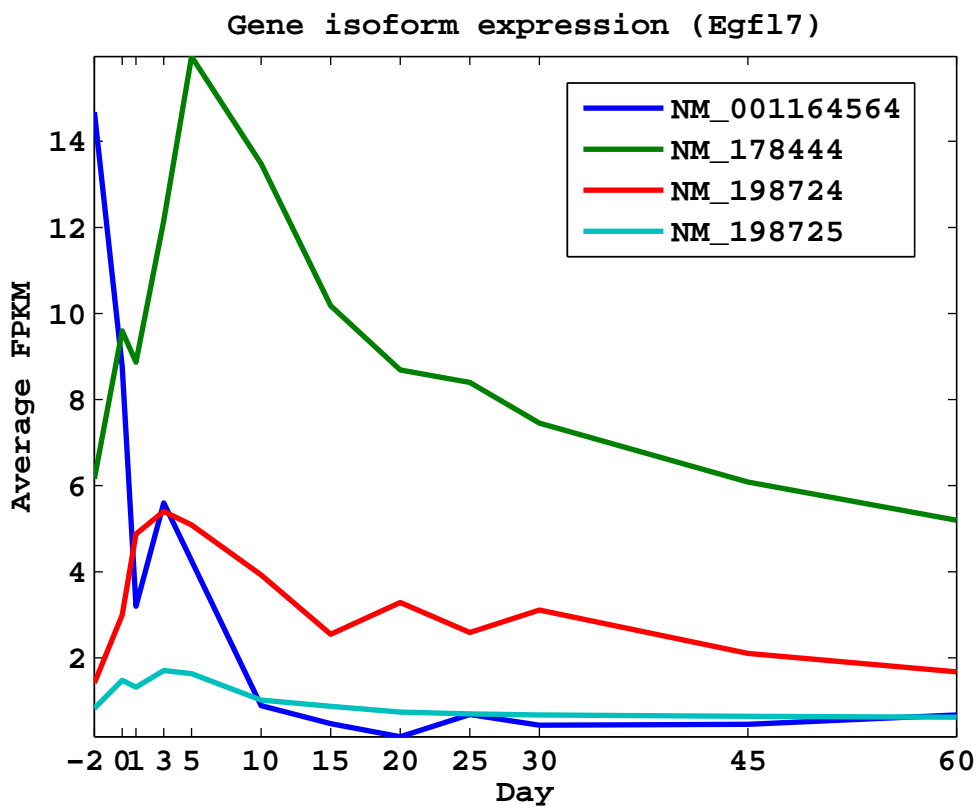



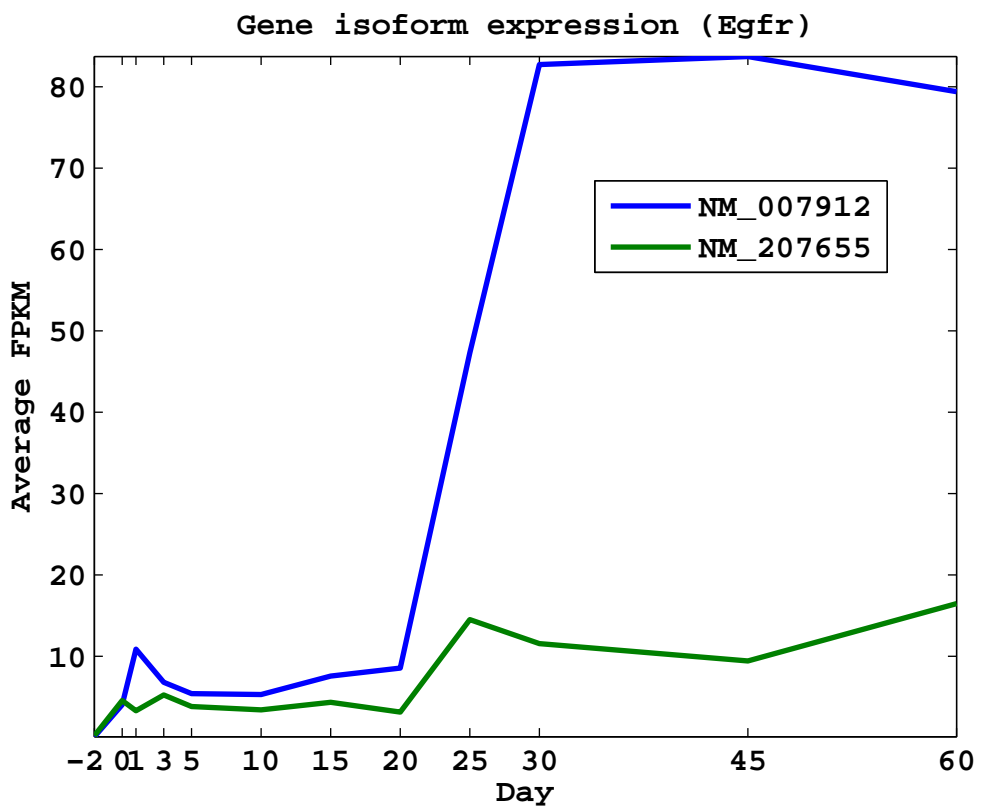

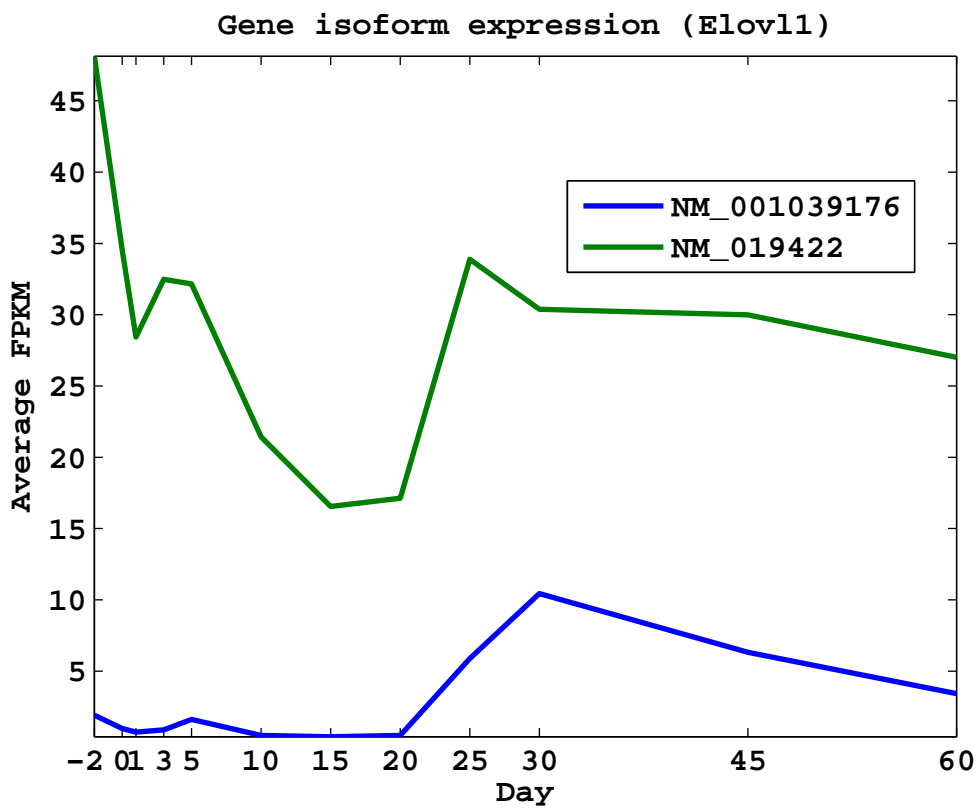

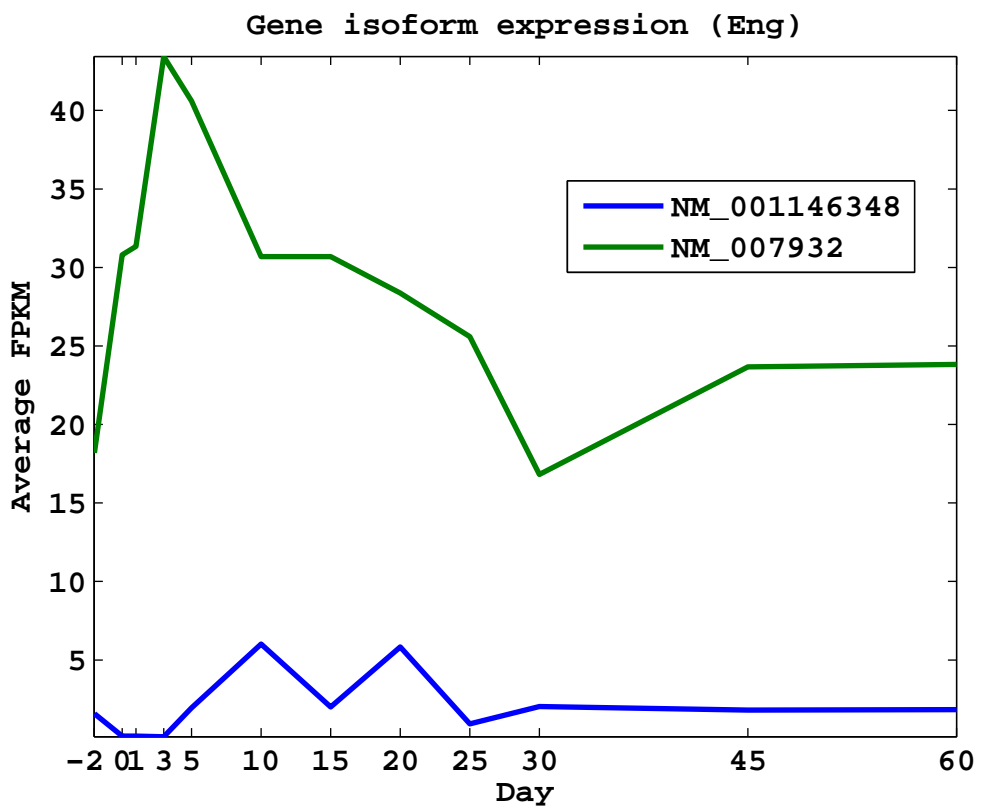

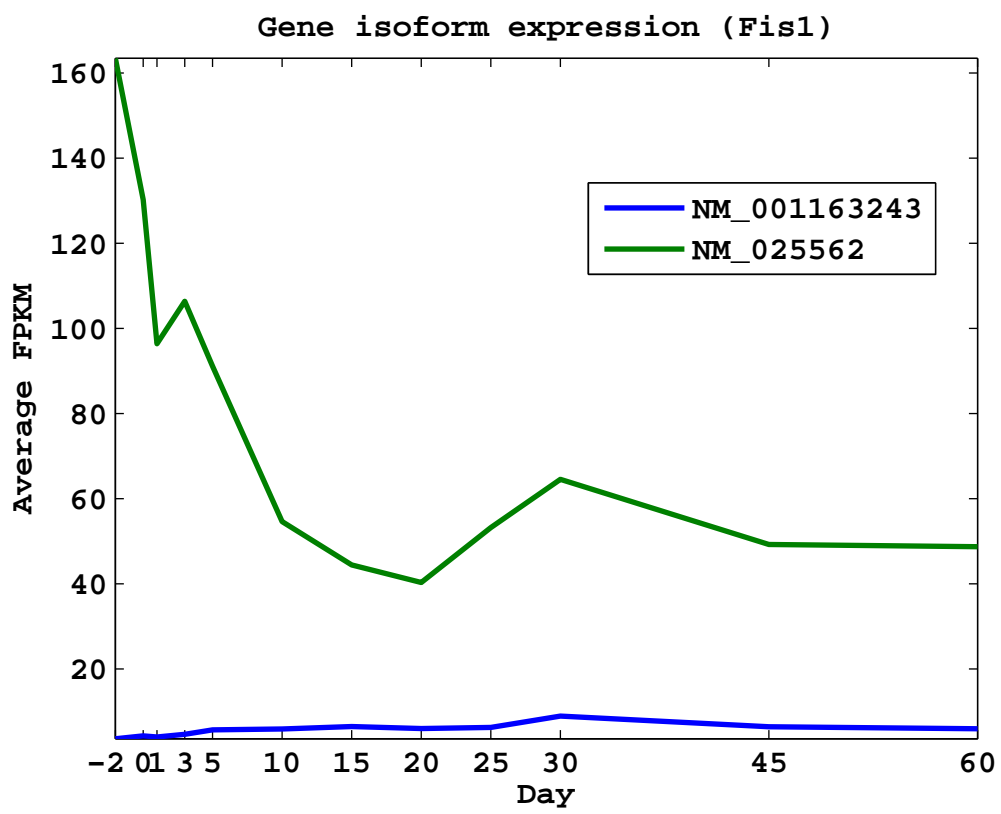

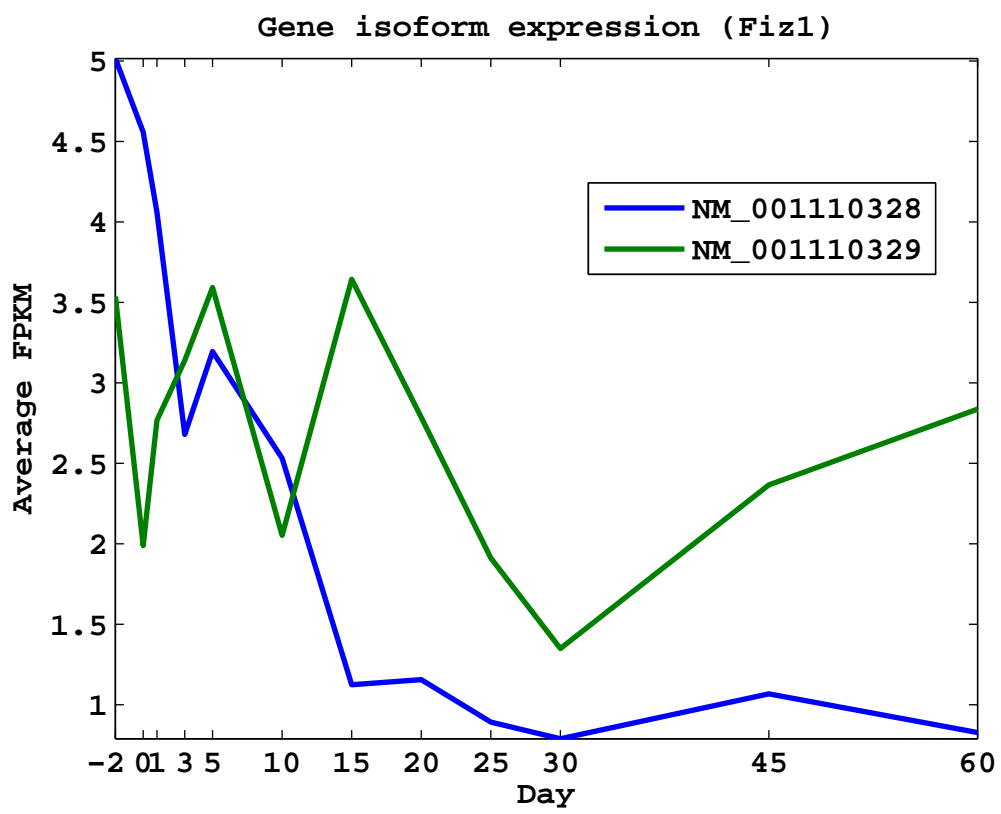

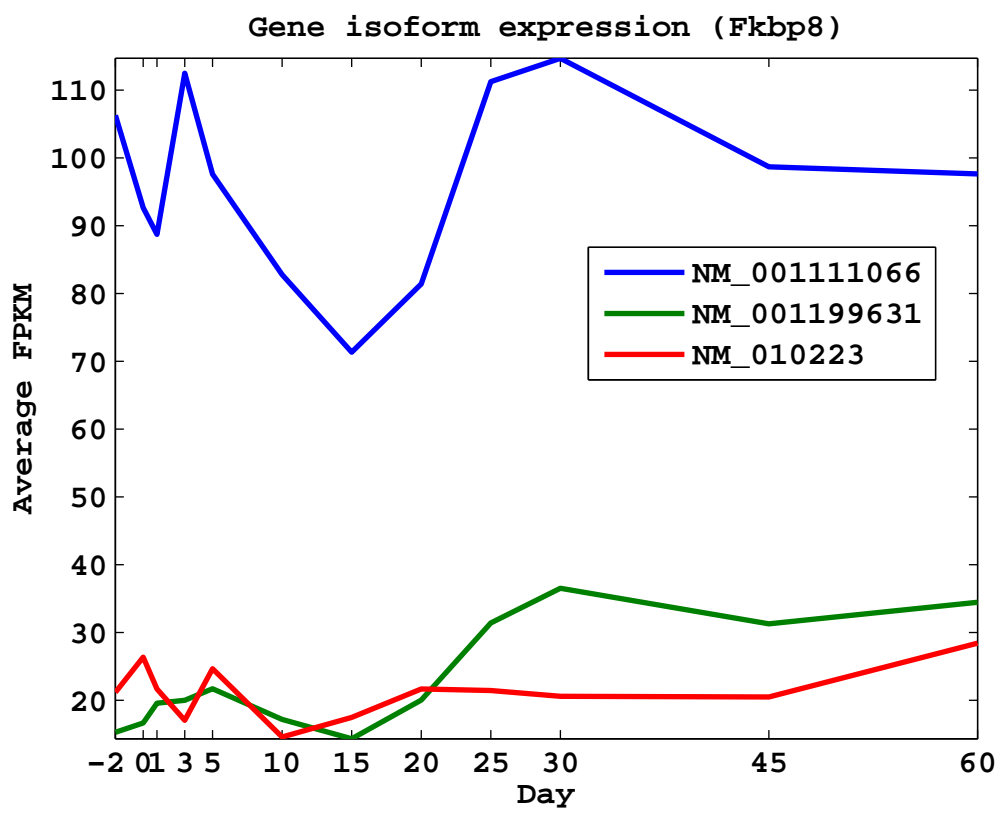

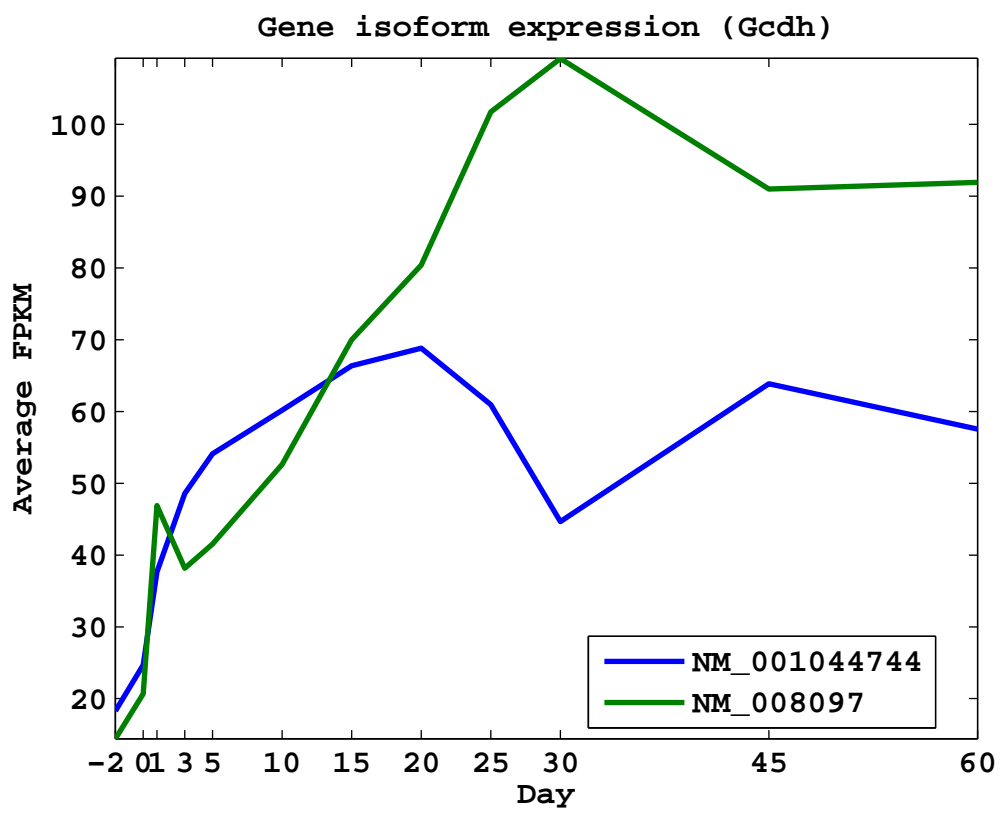

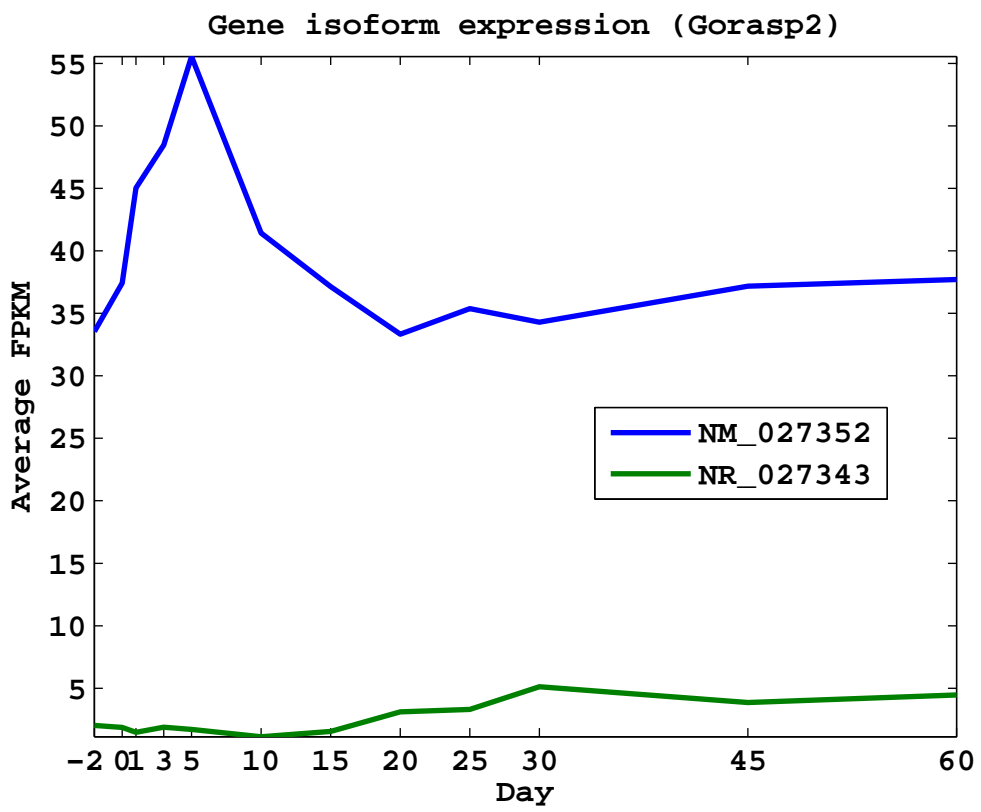



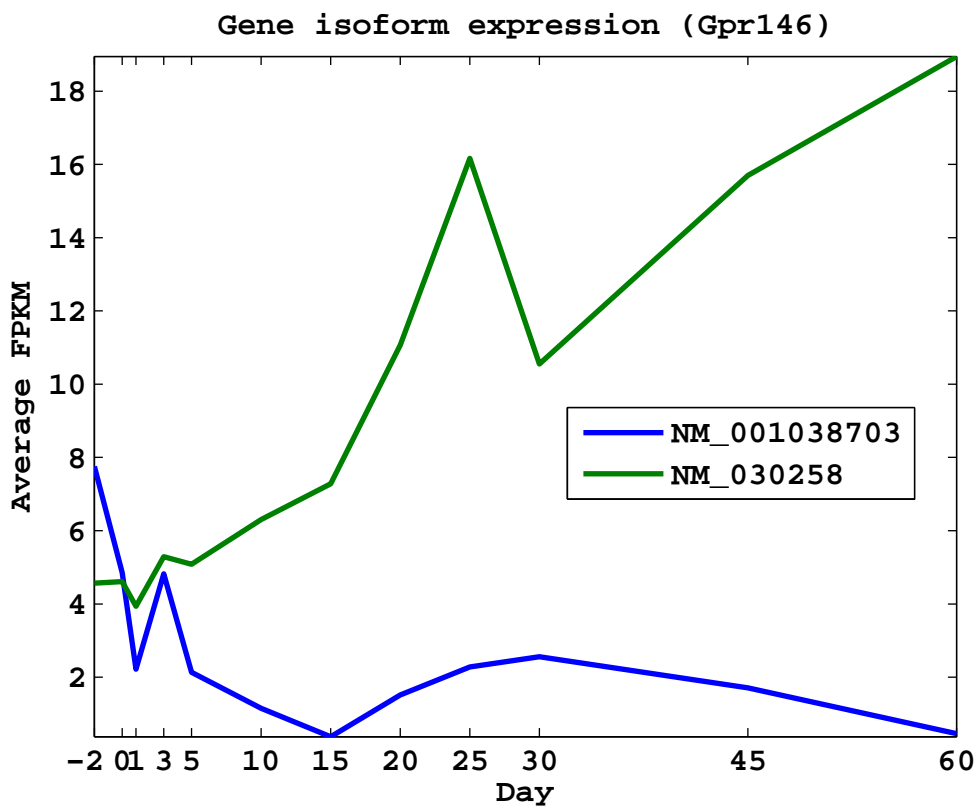

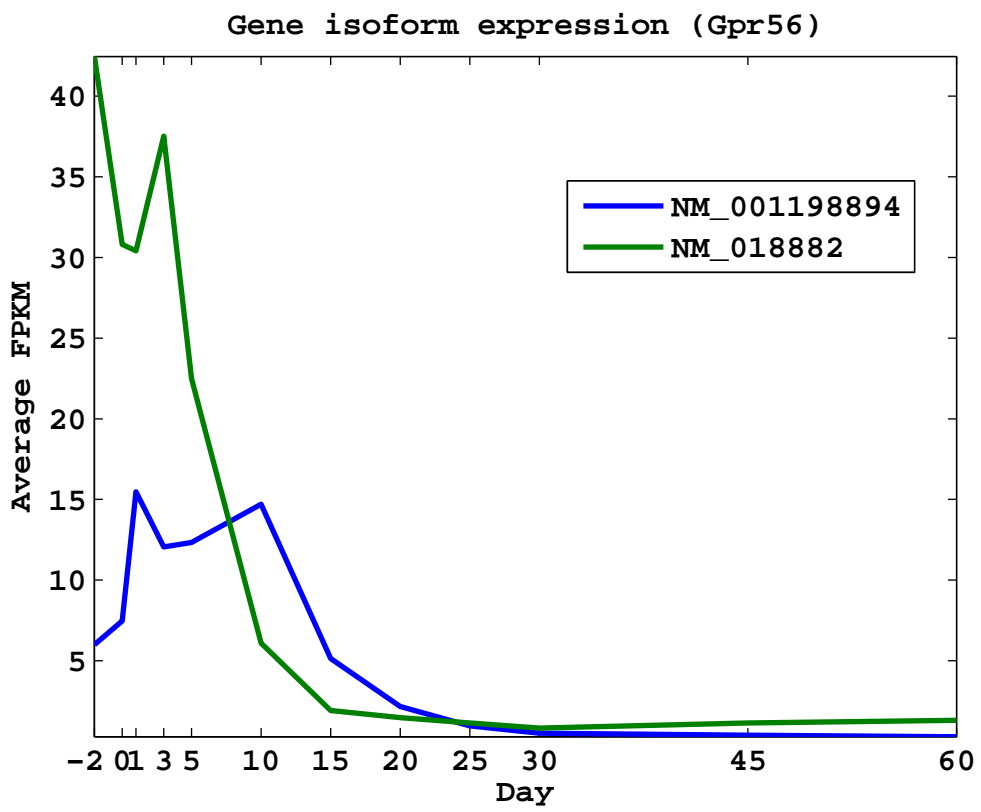

Gene isoform expression (H2afy)

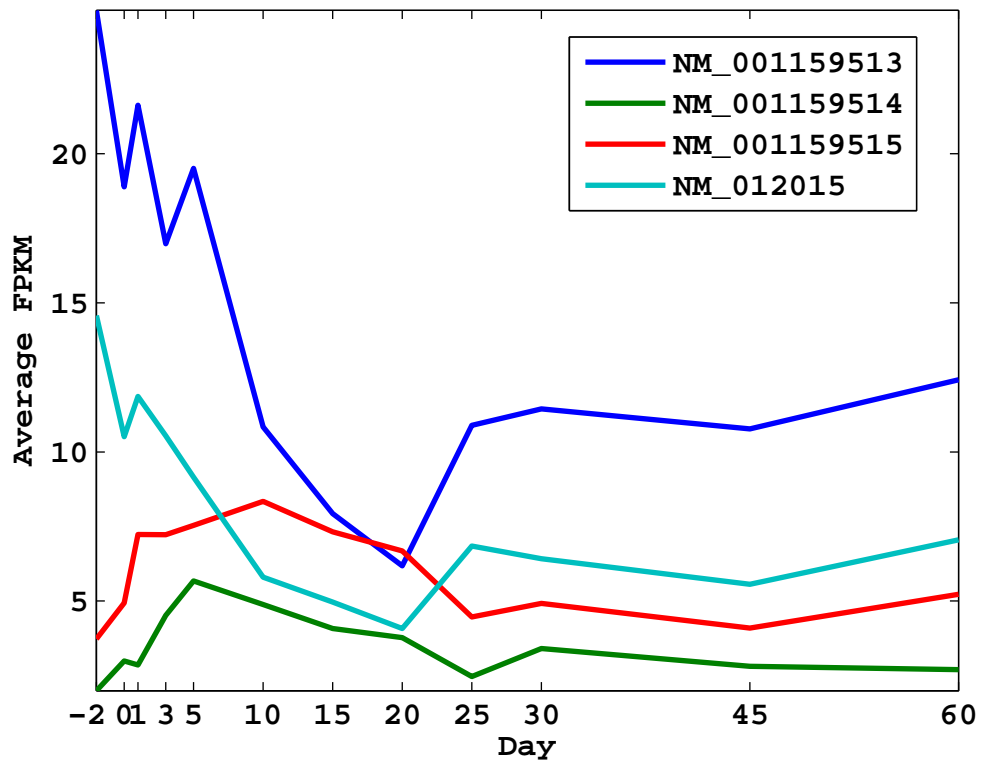

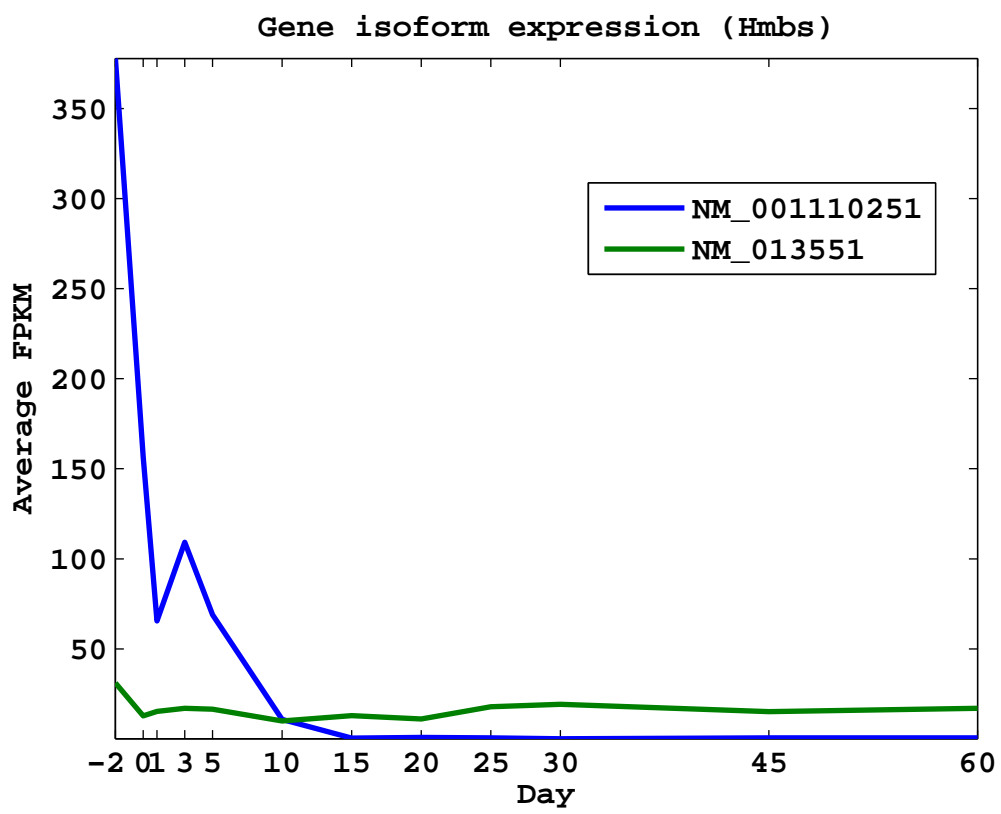

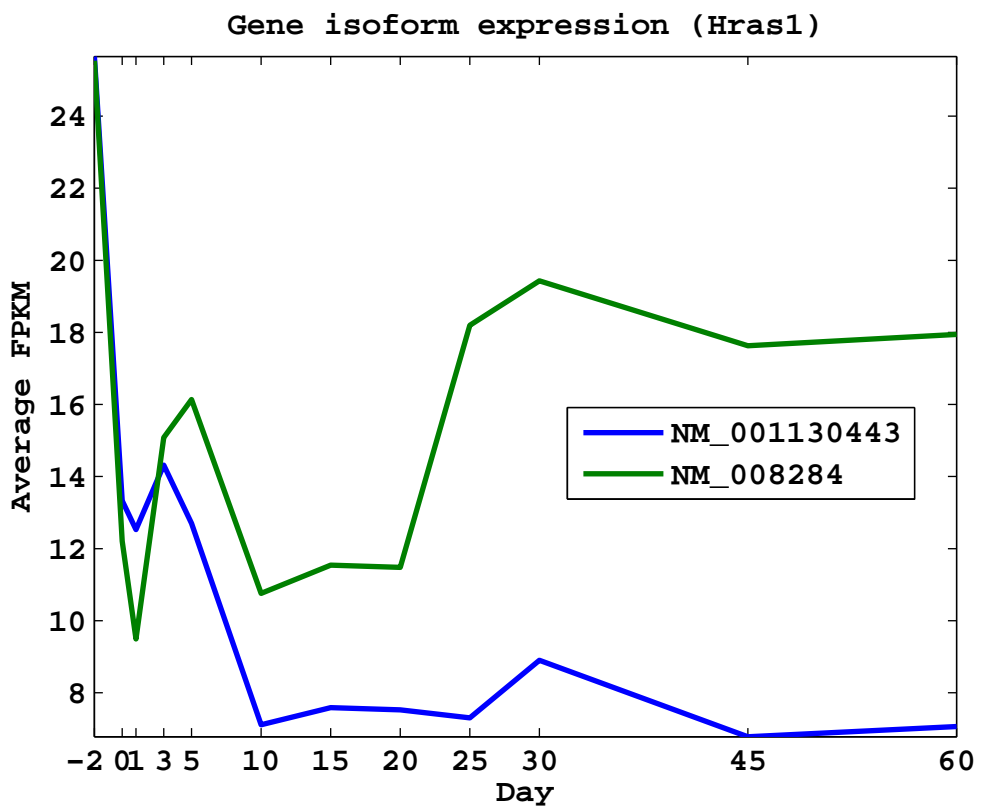

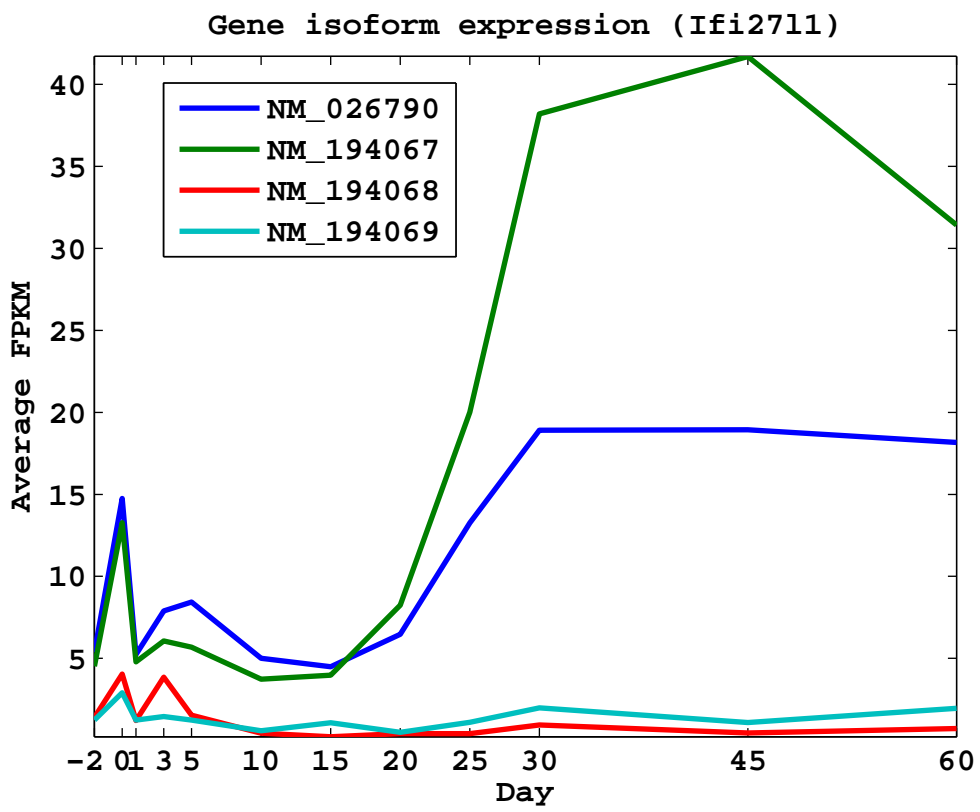

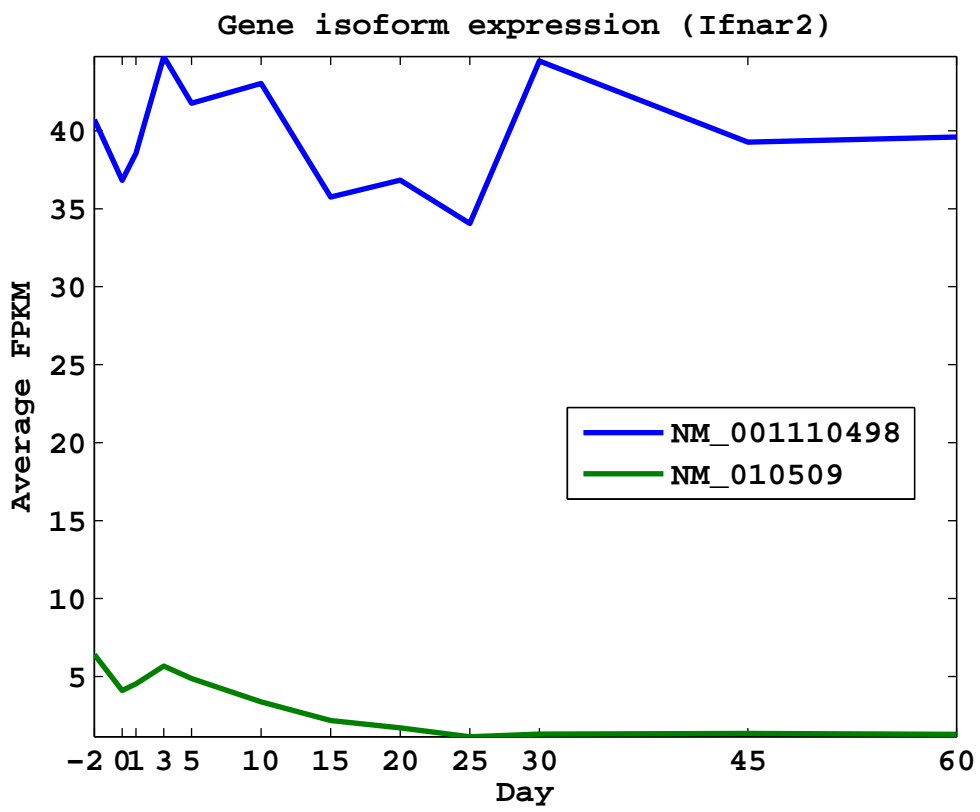

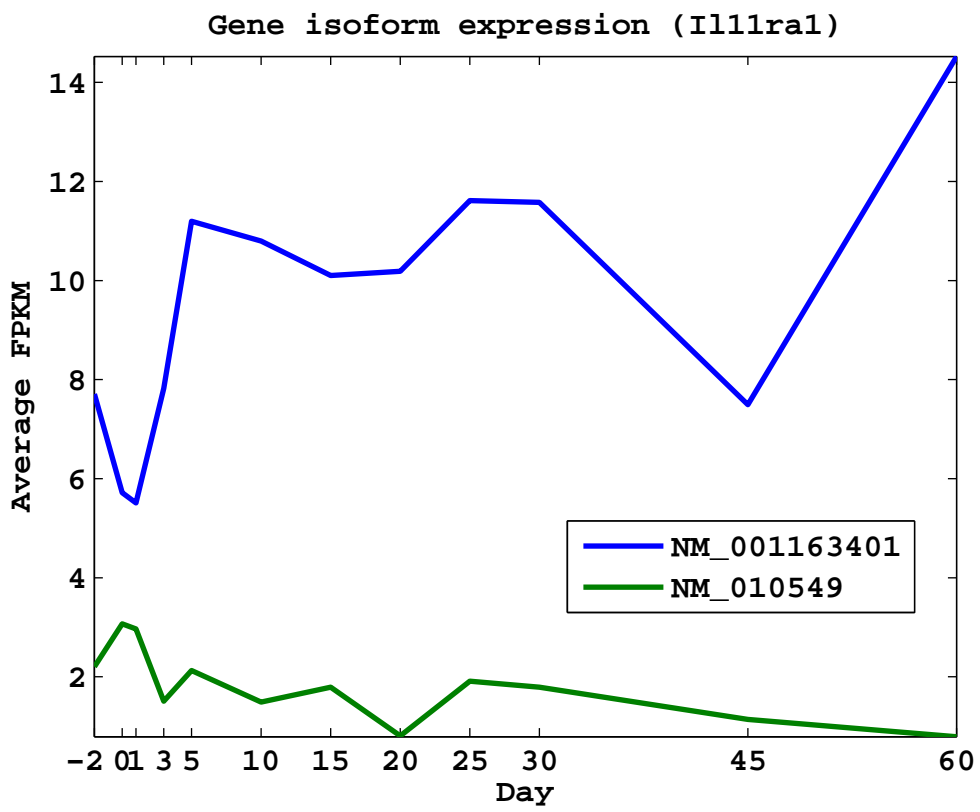



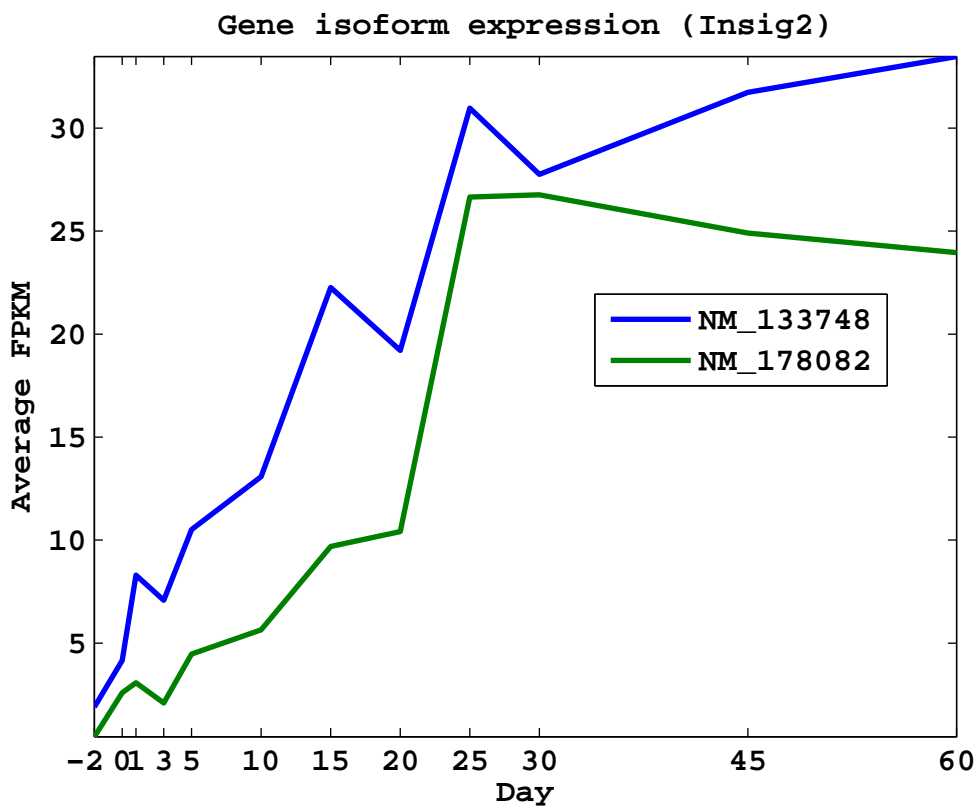

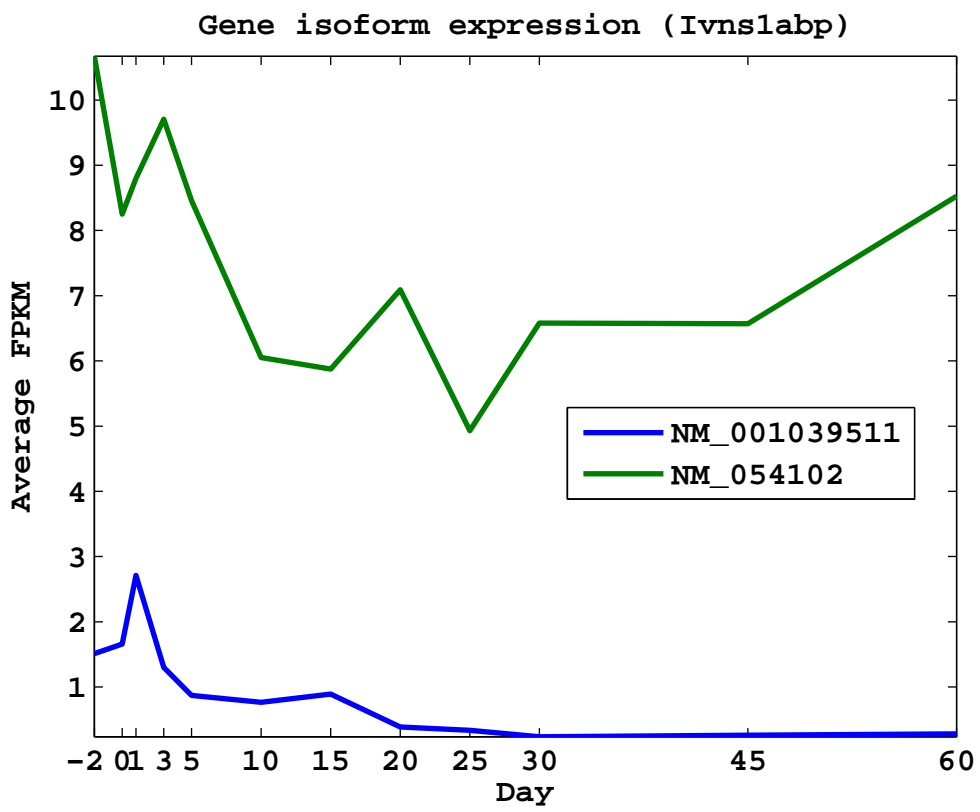

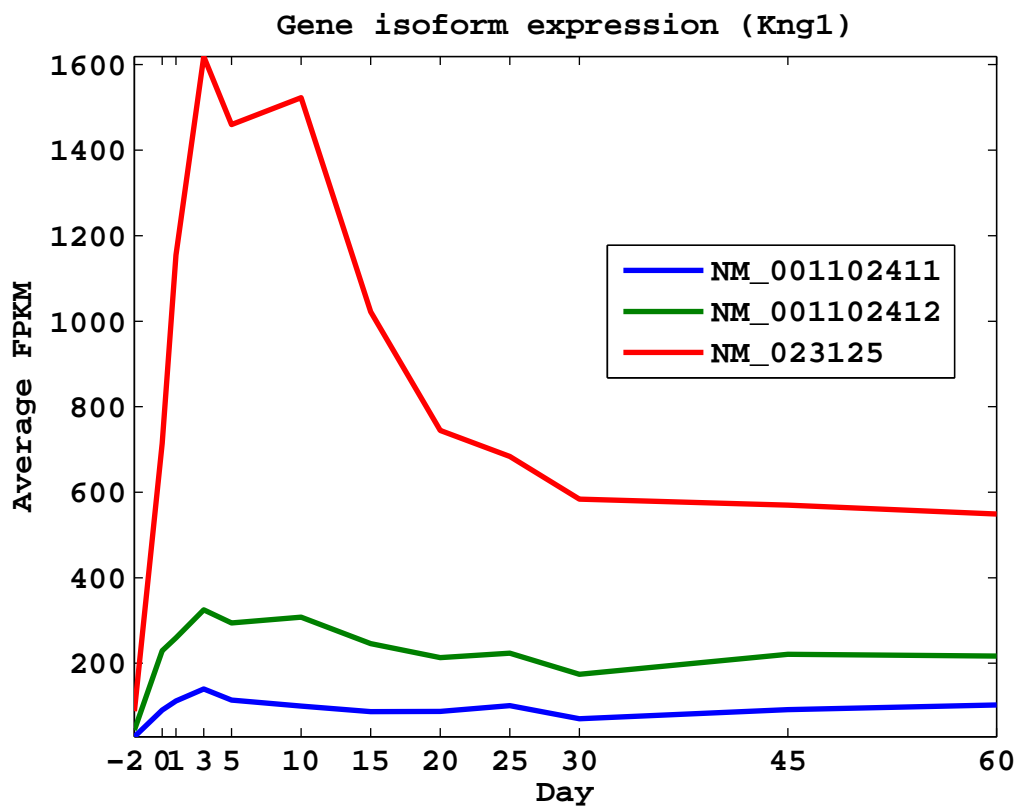

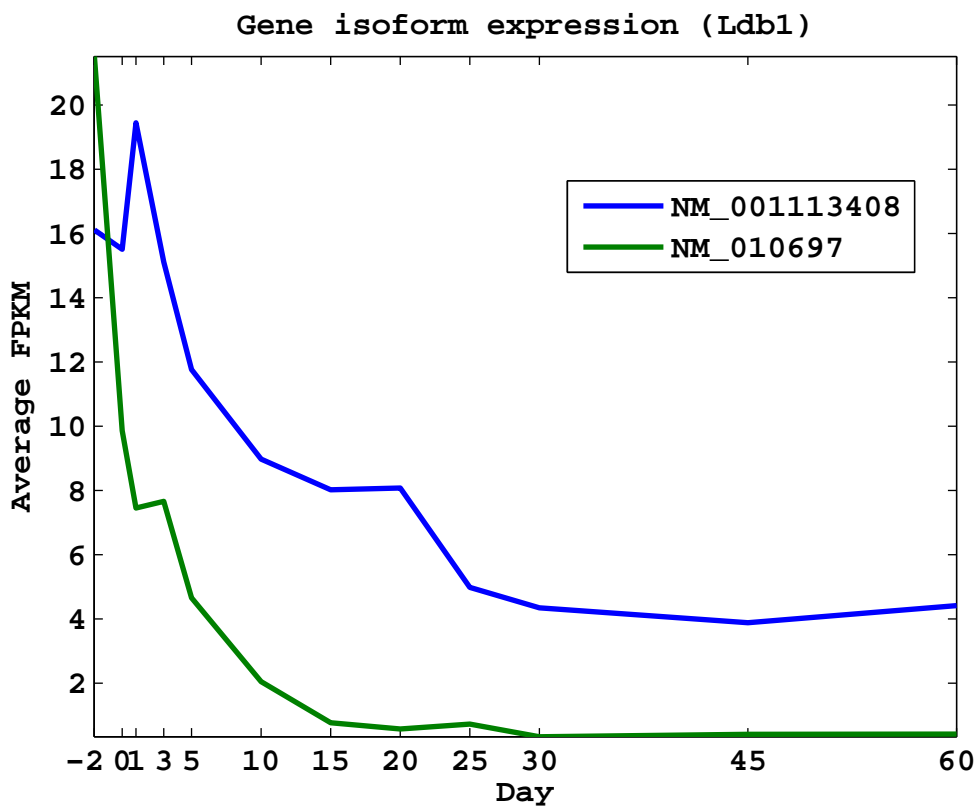

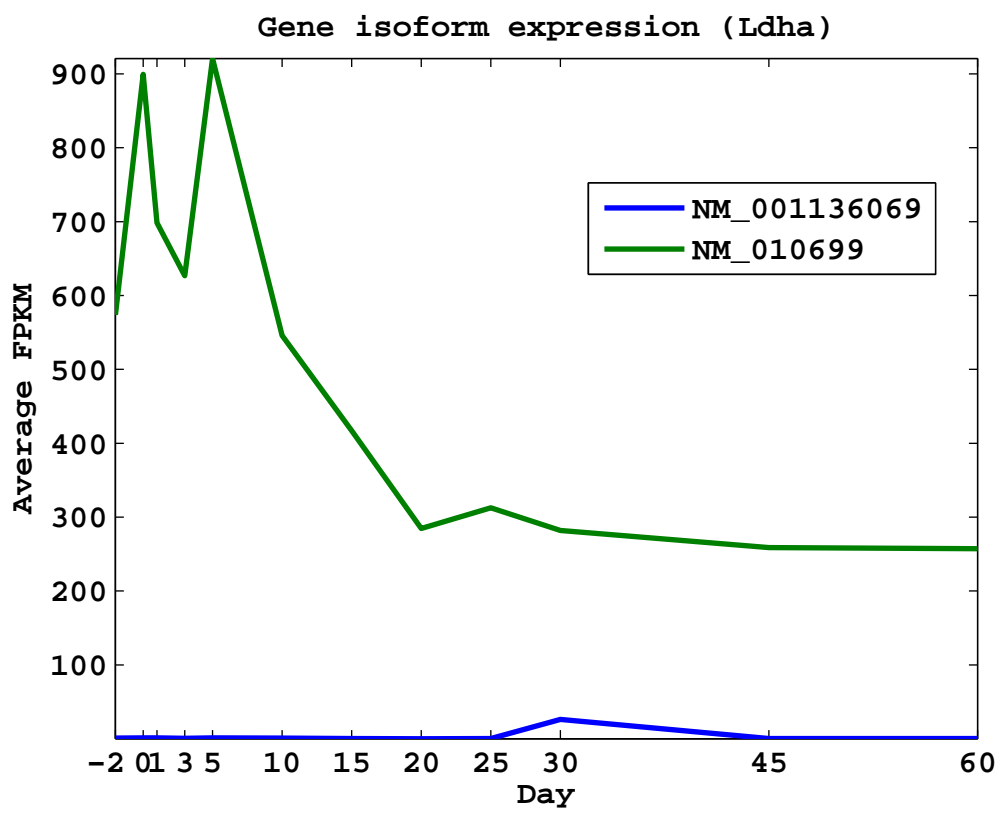

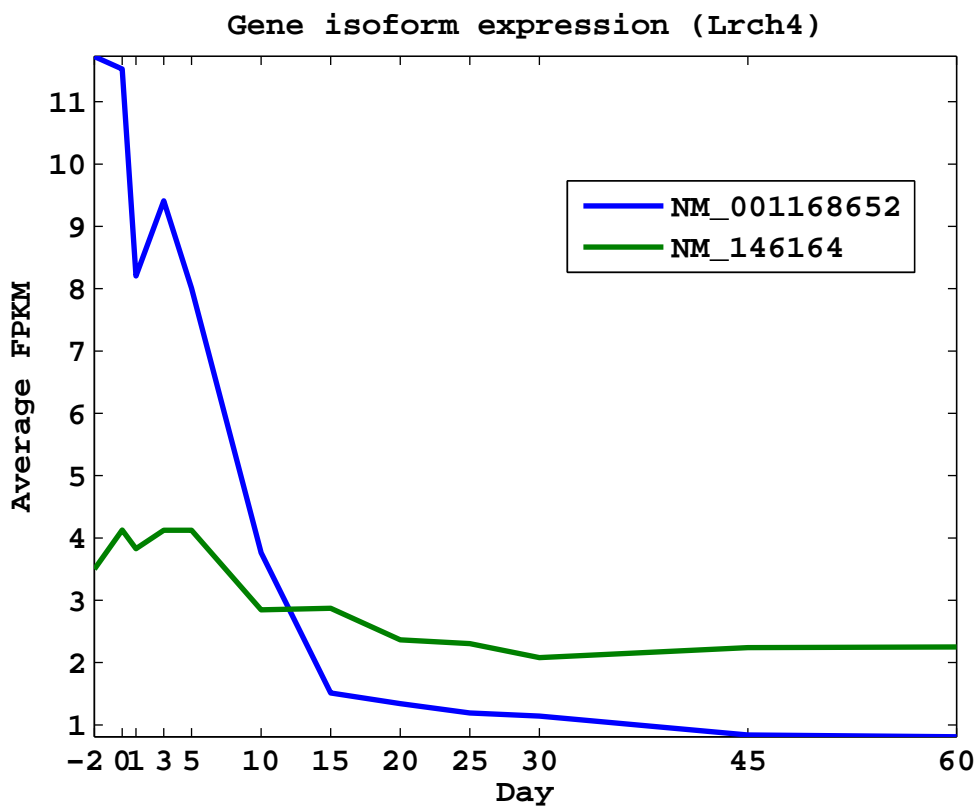

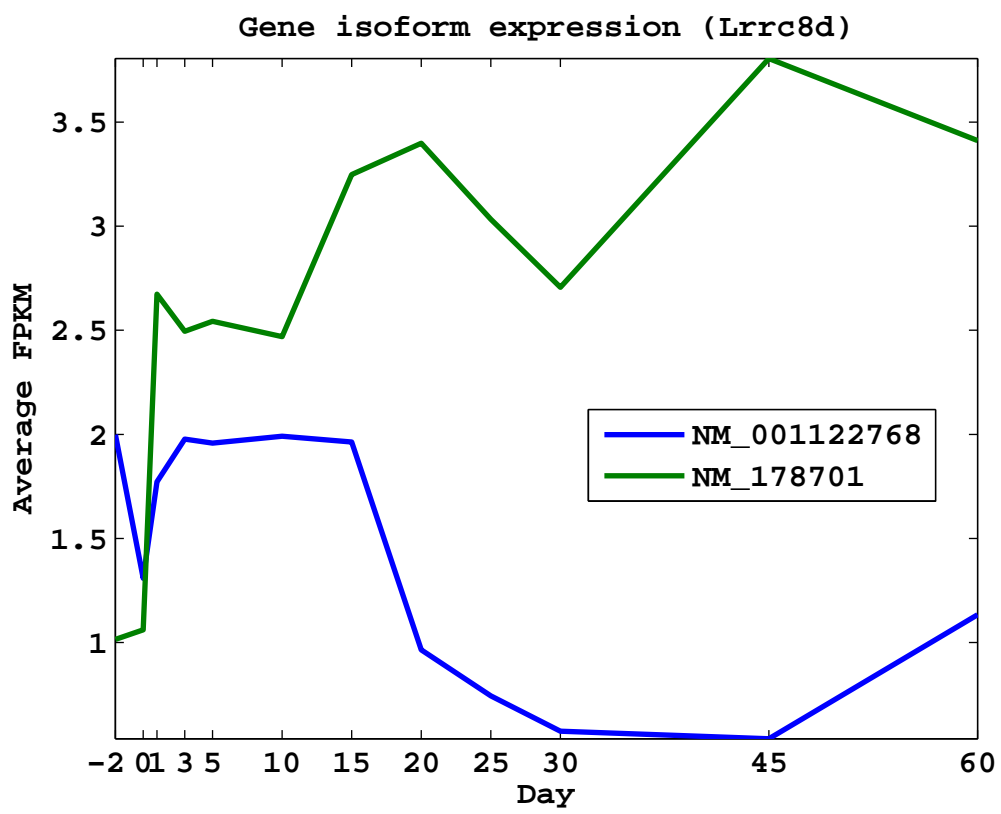

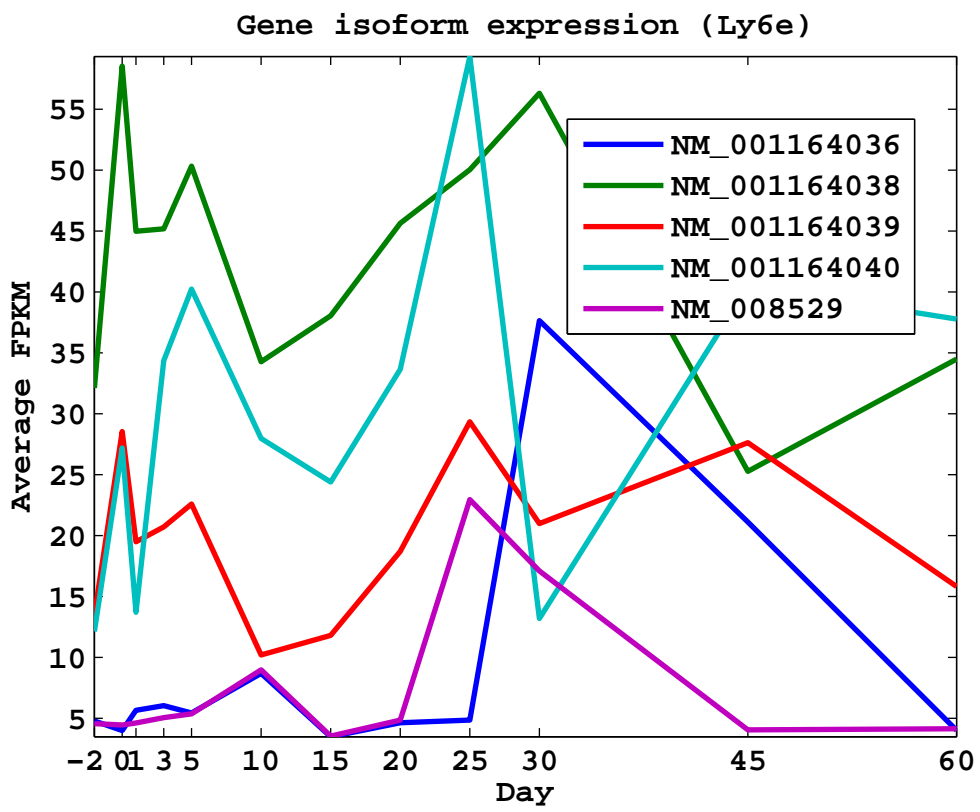



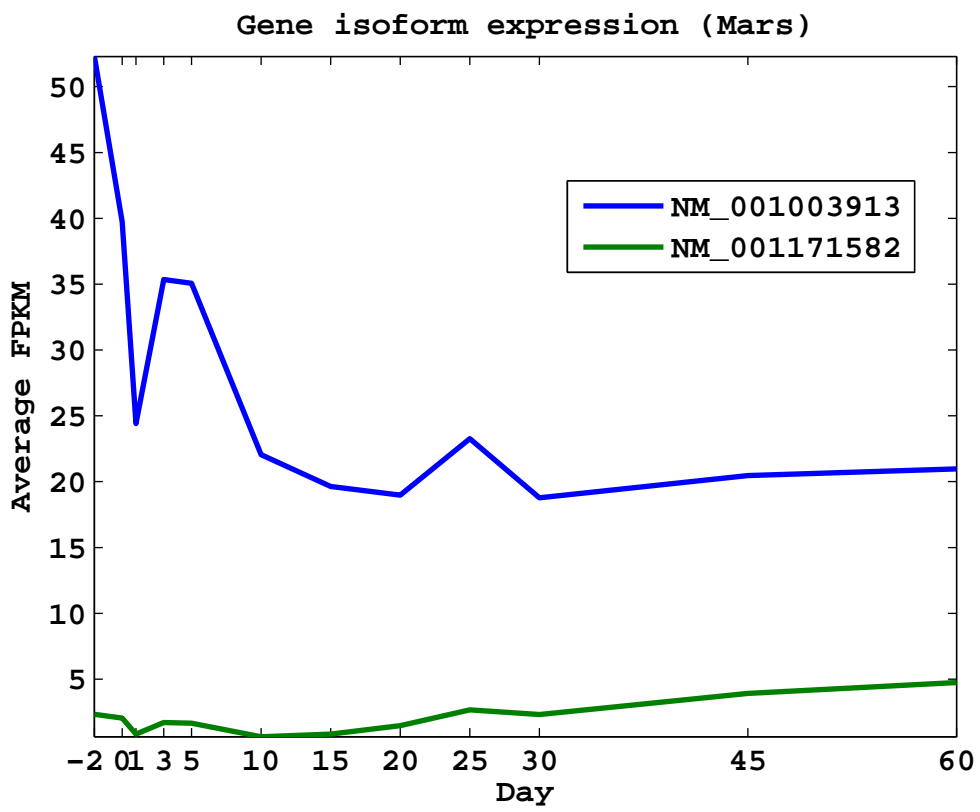

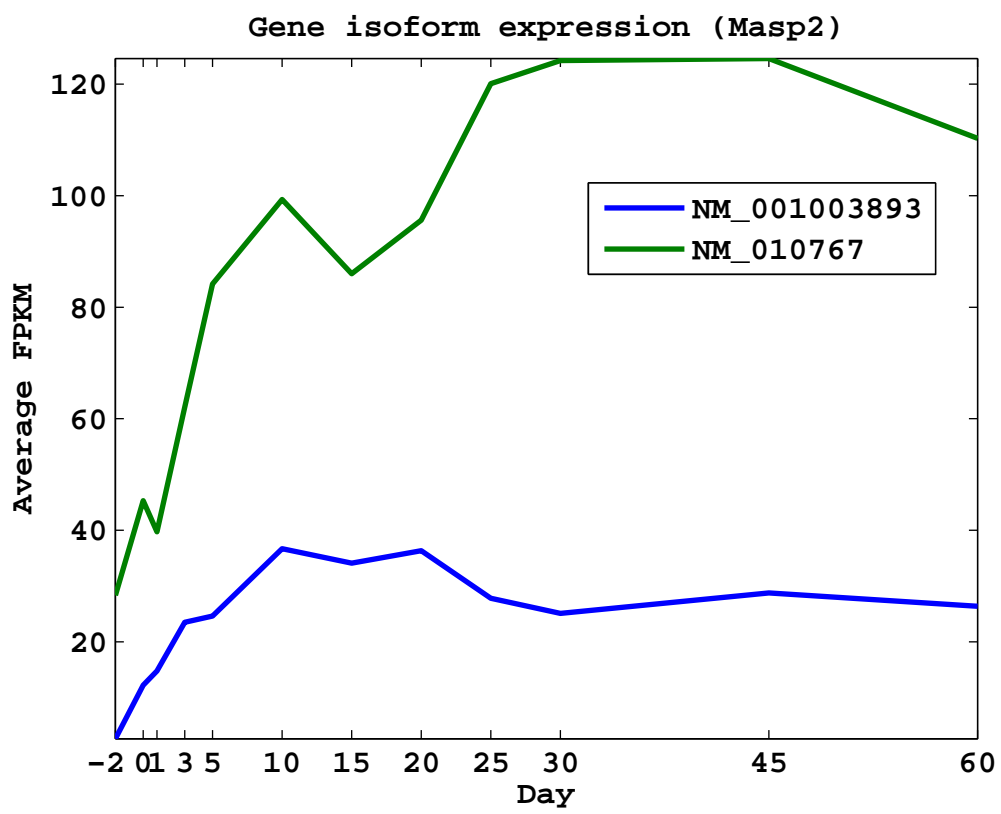

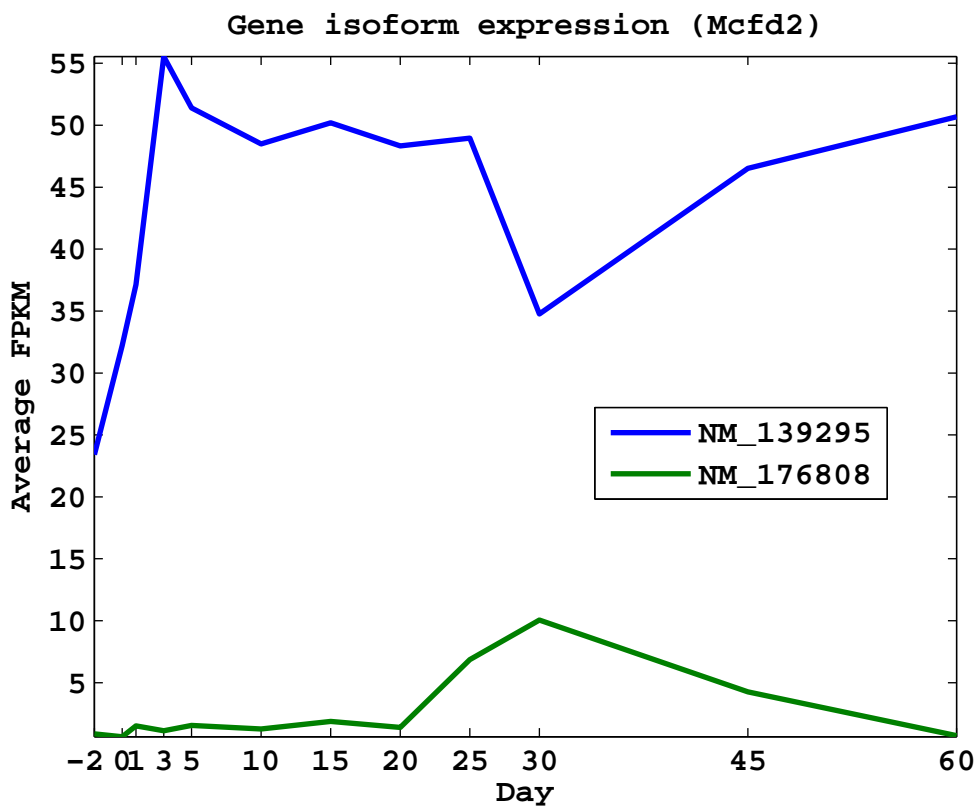

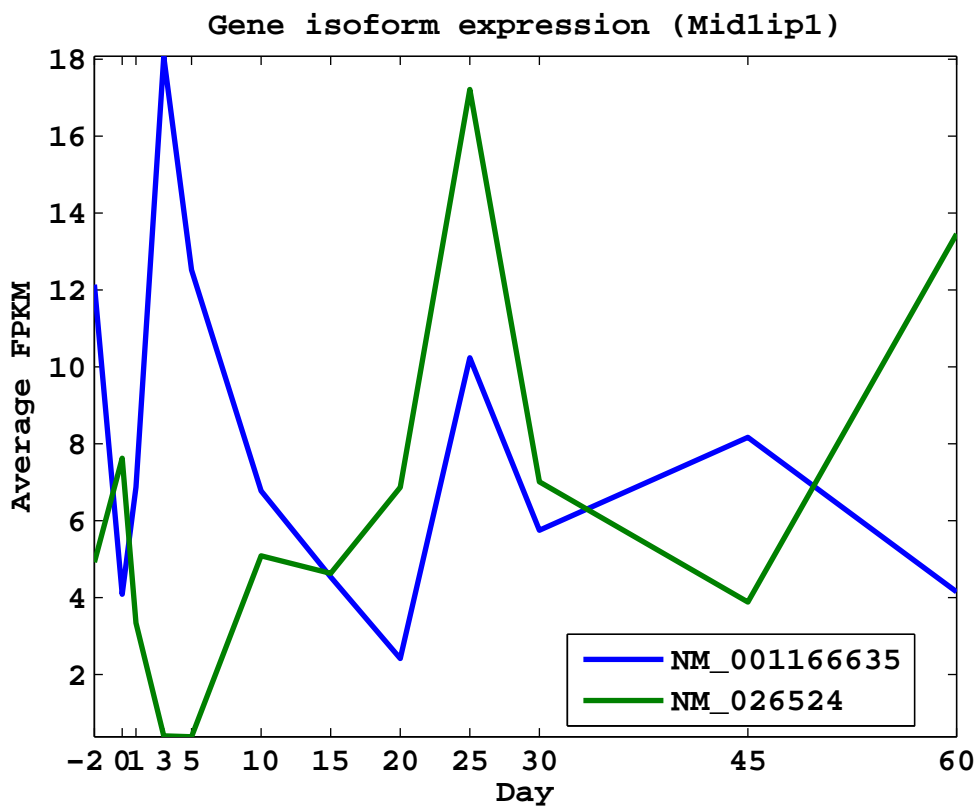

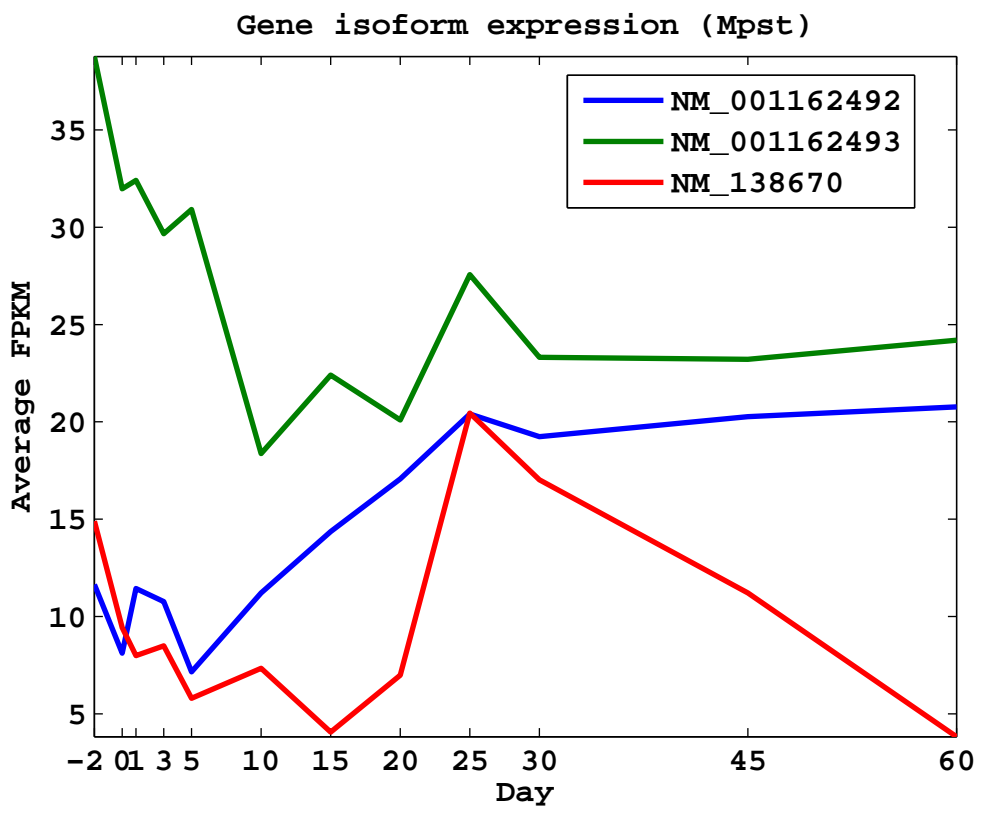

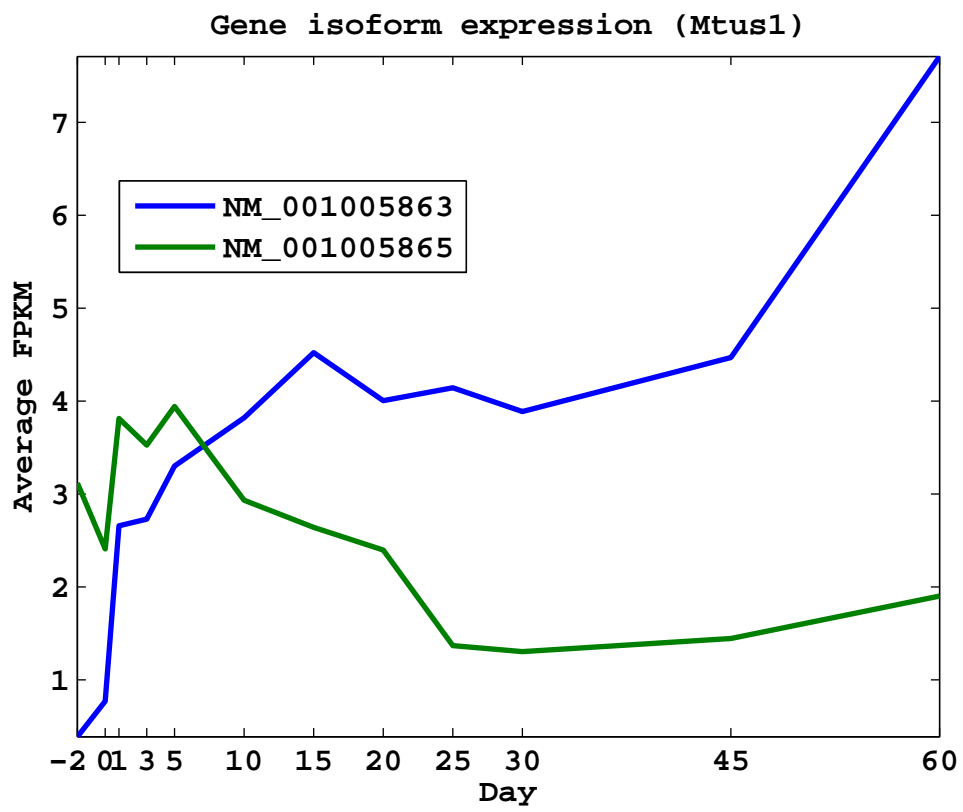

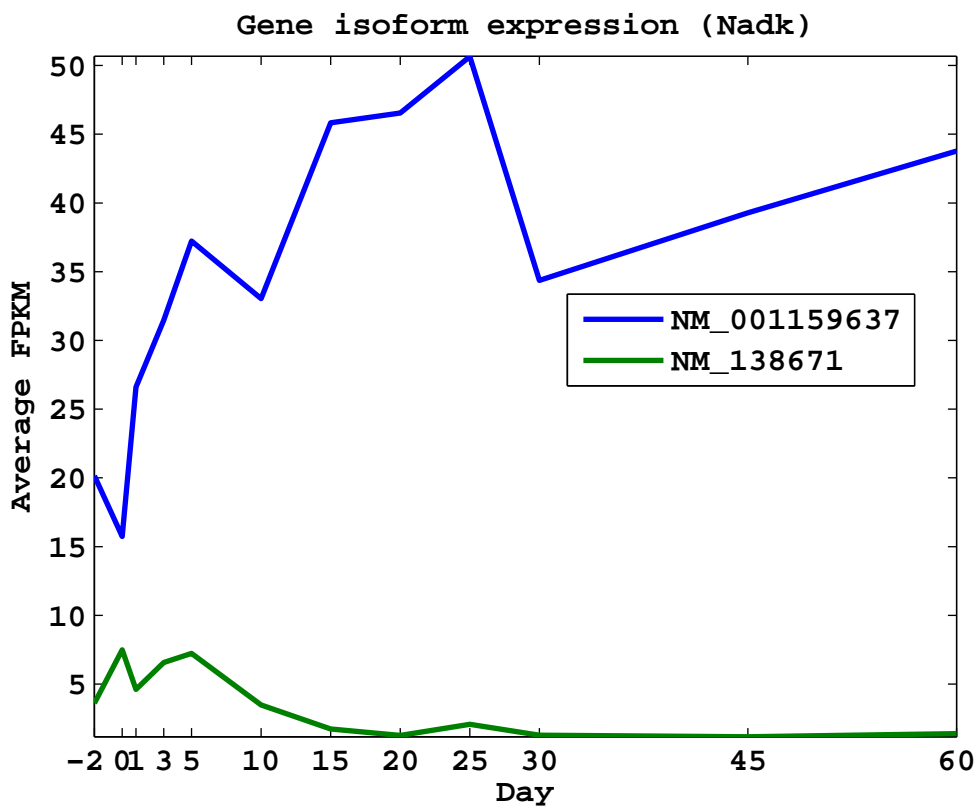

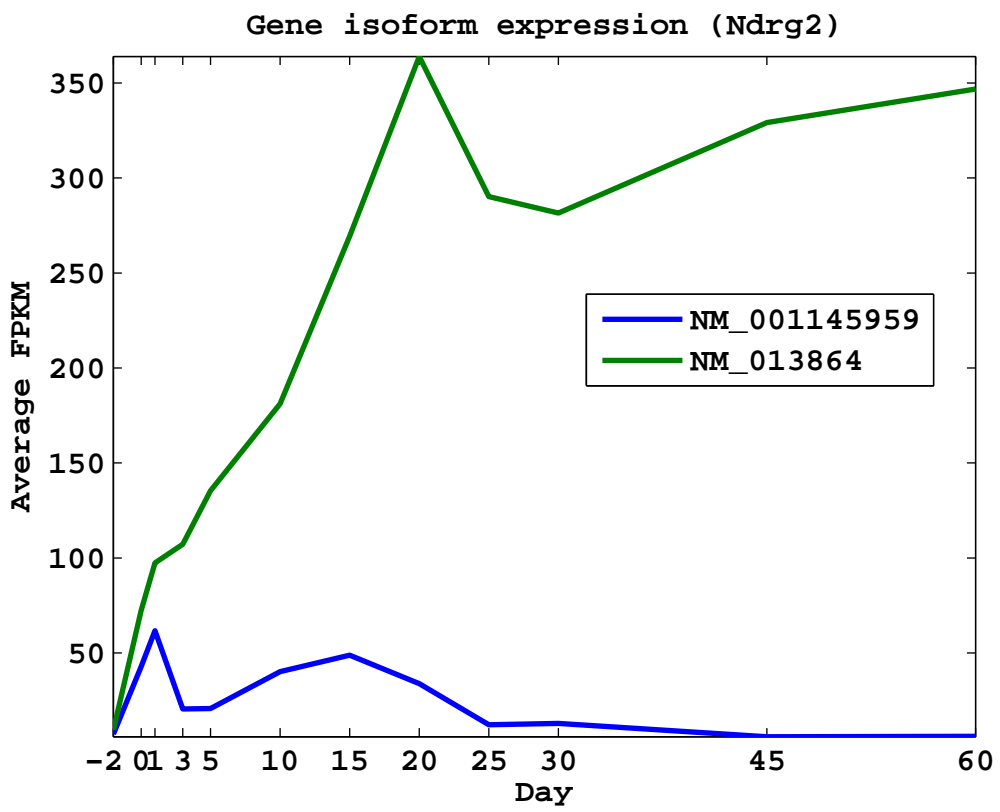



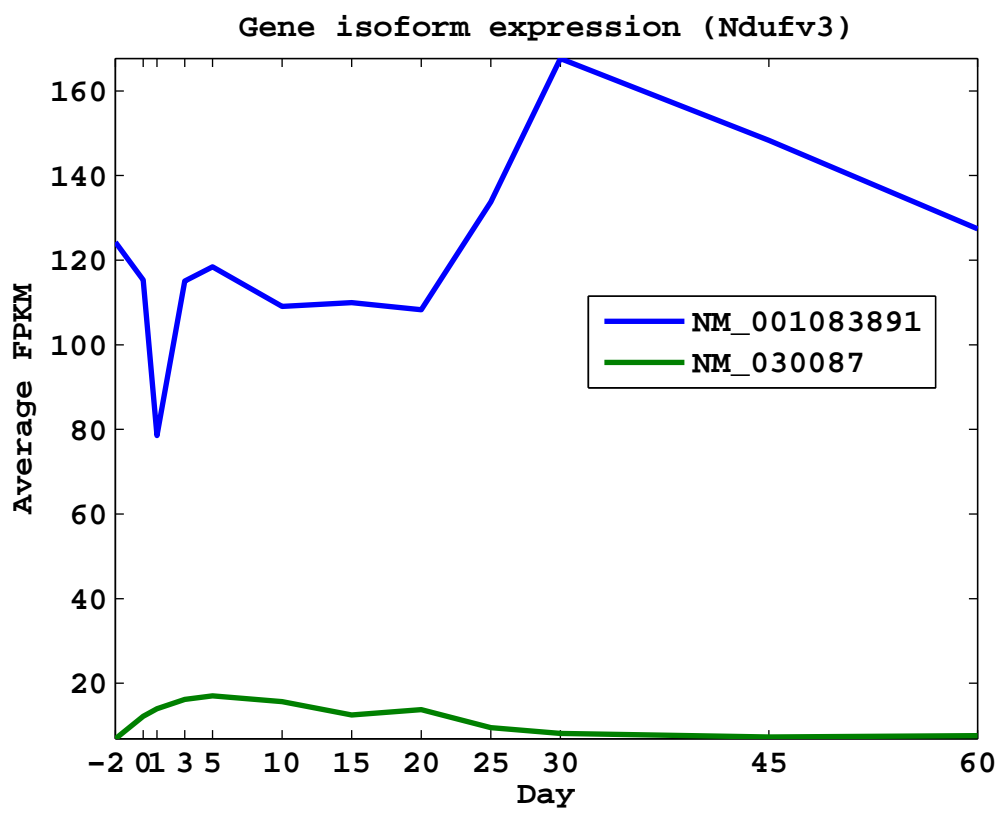

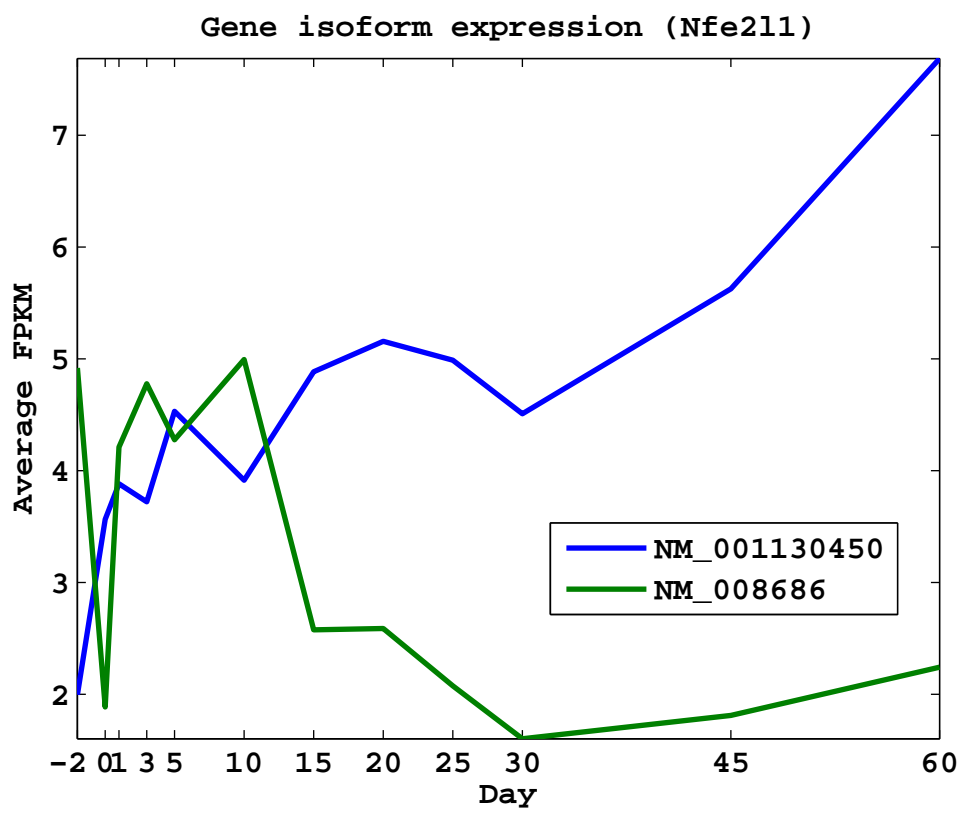

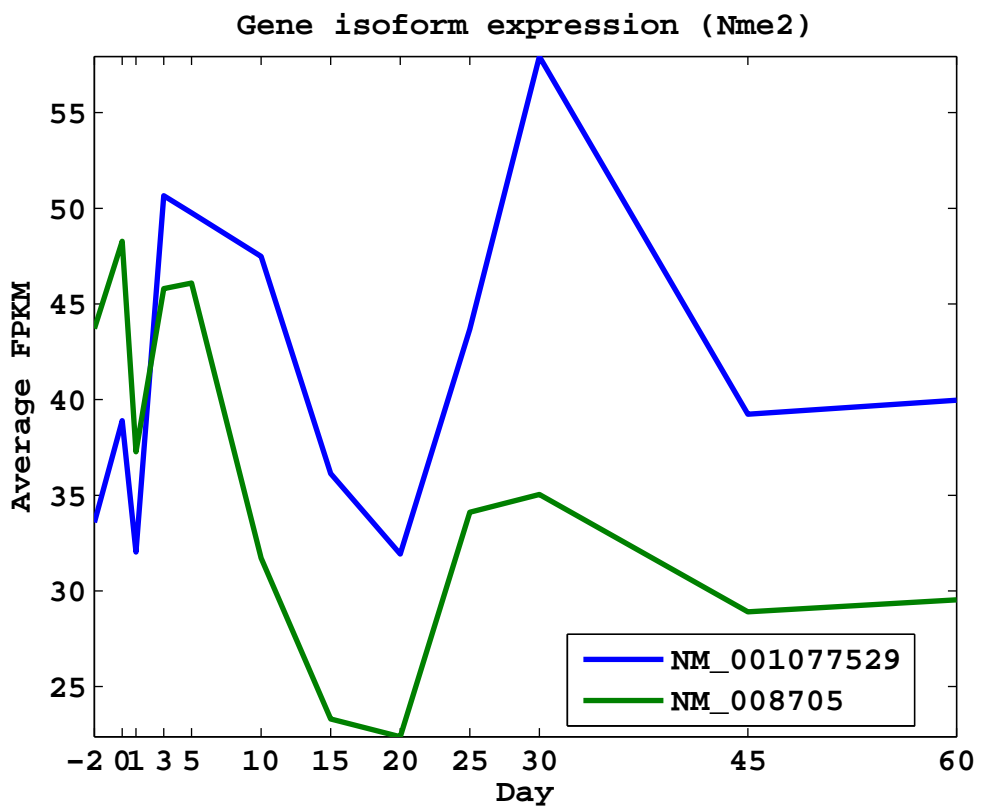

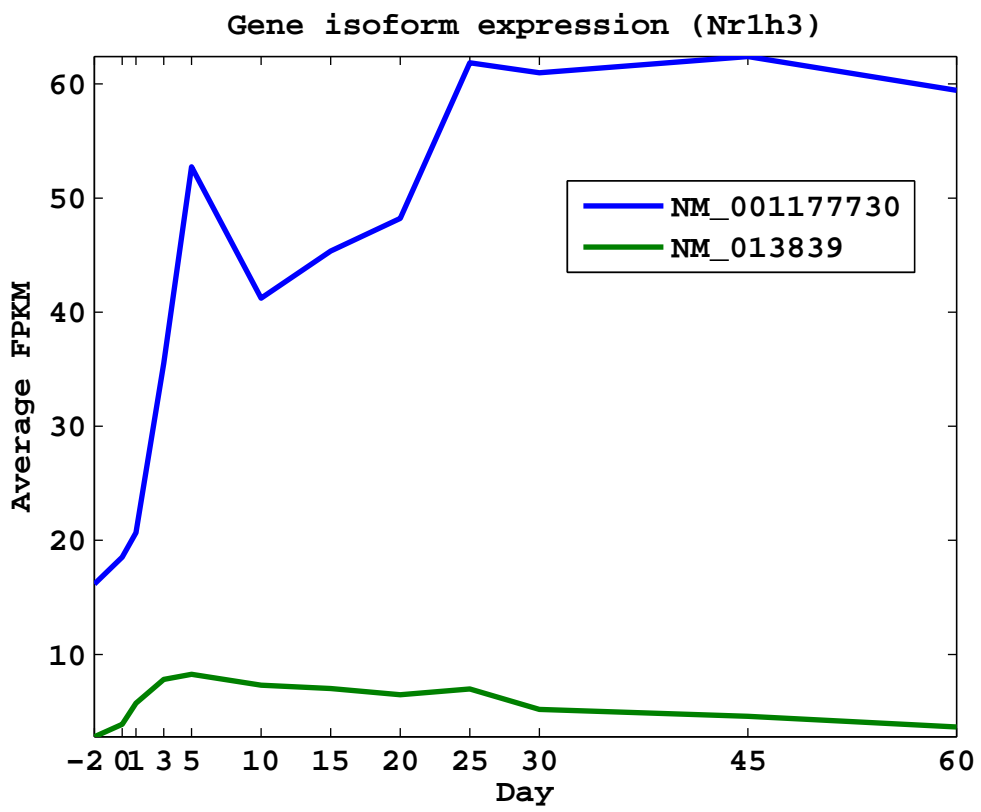

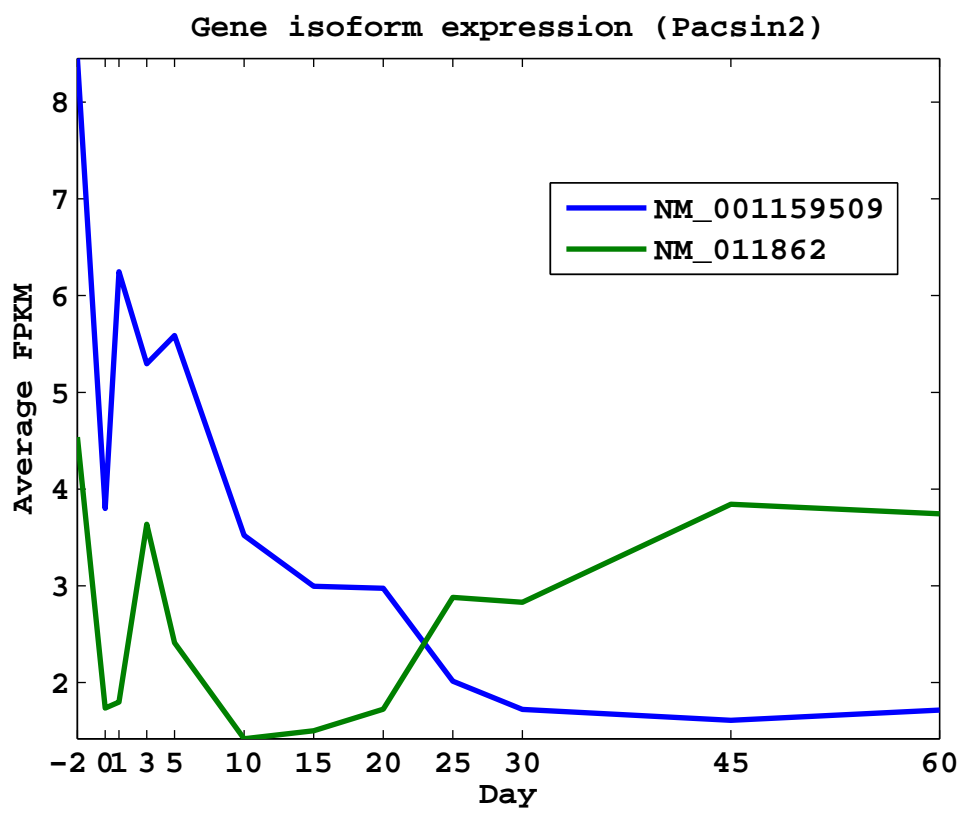

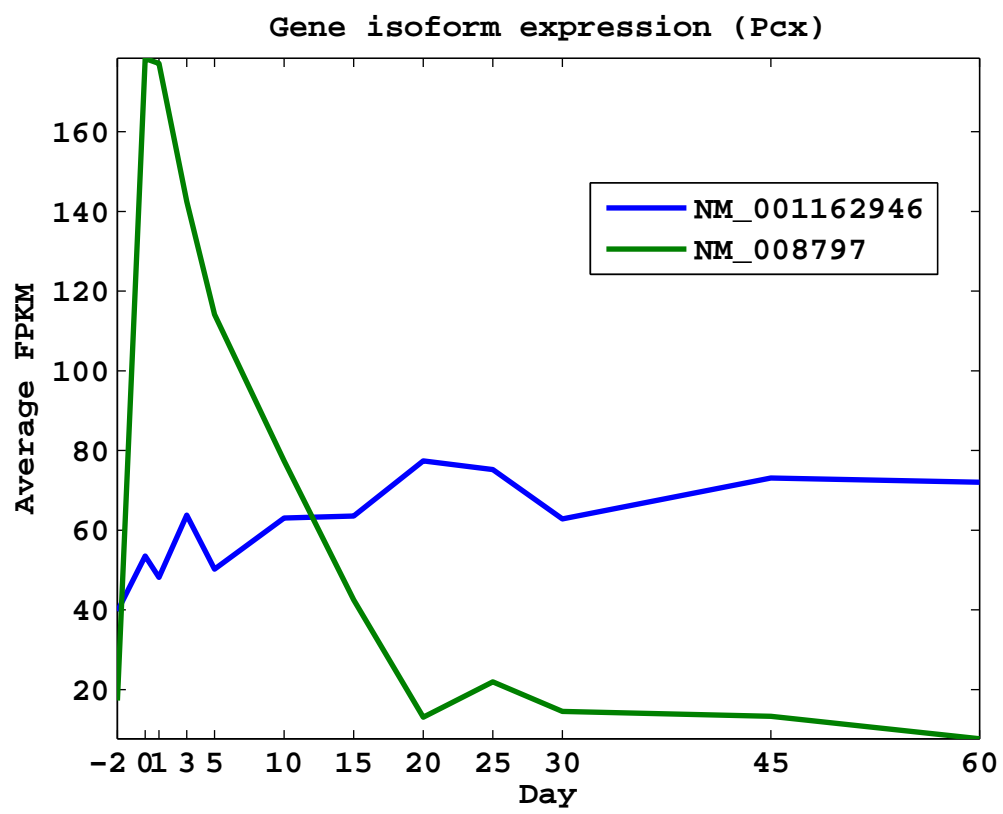

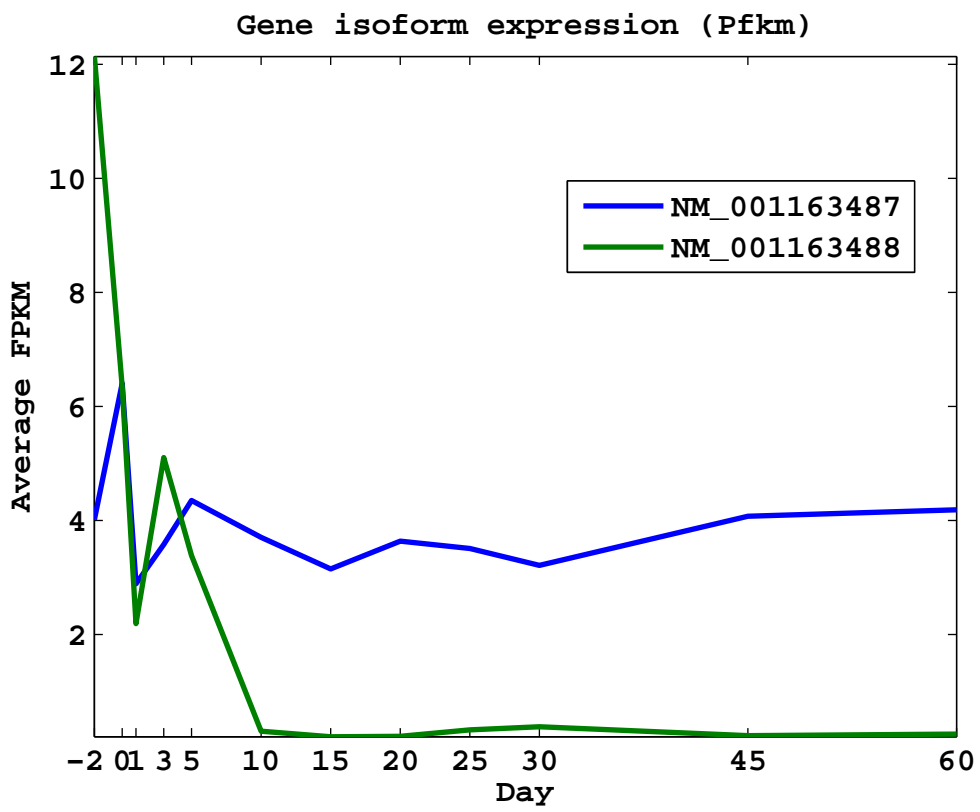

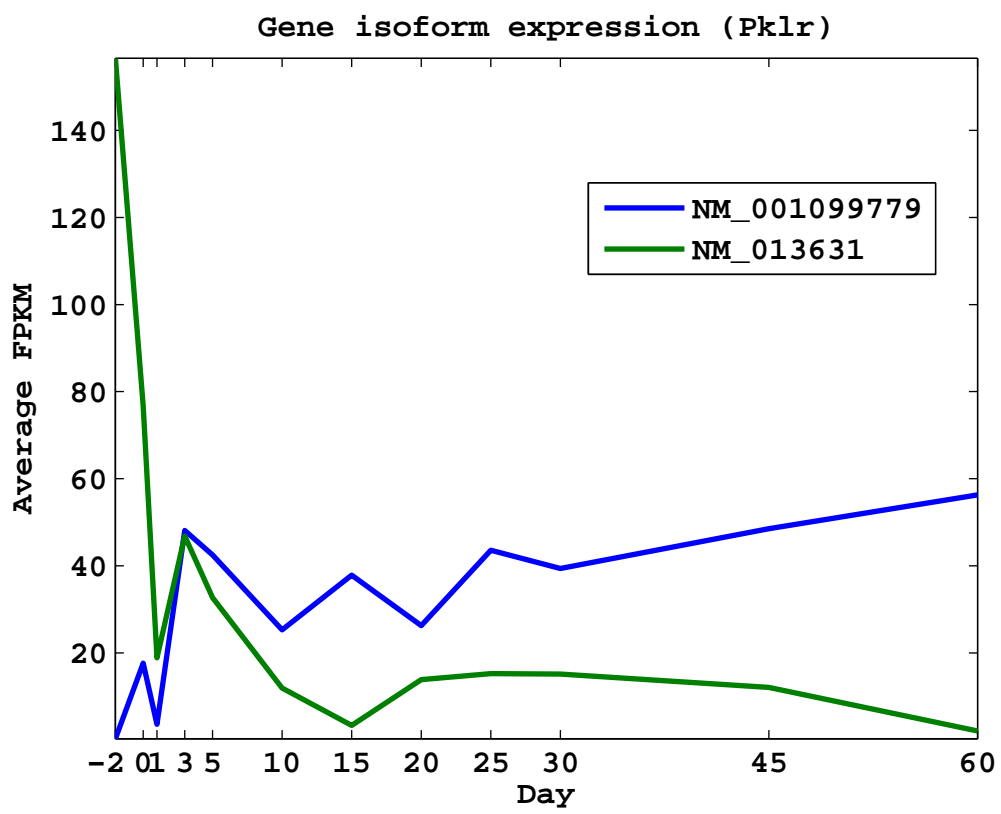



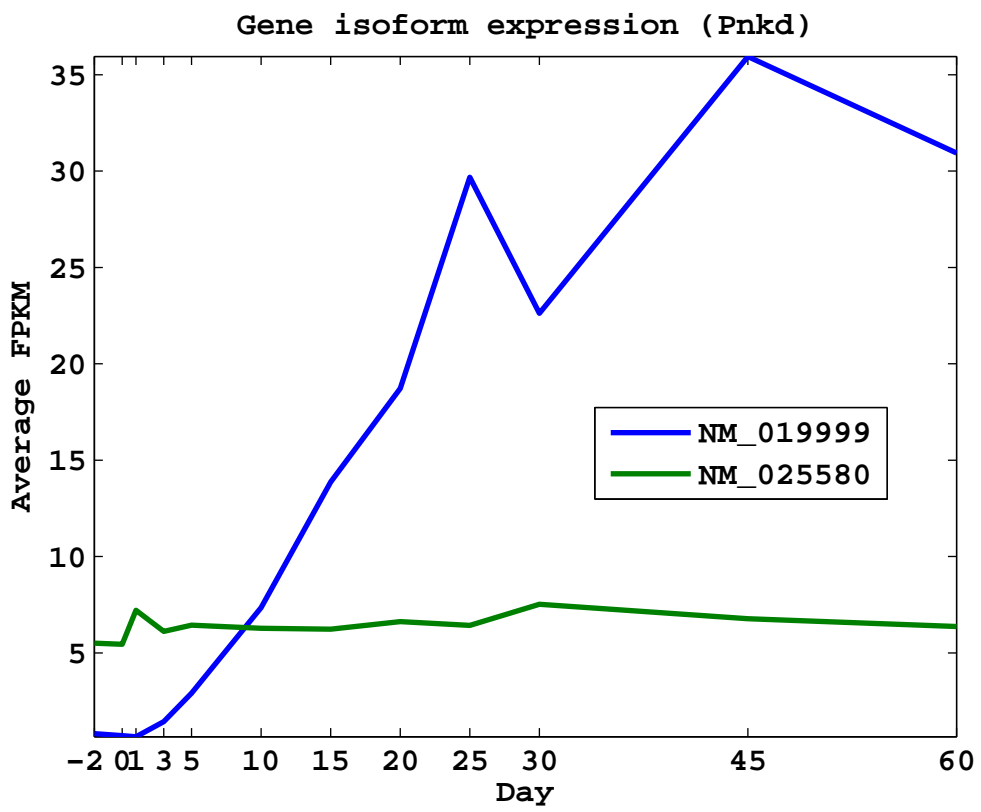

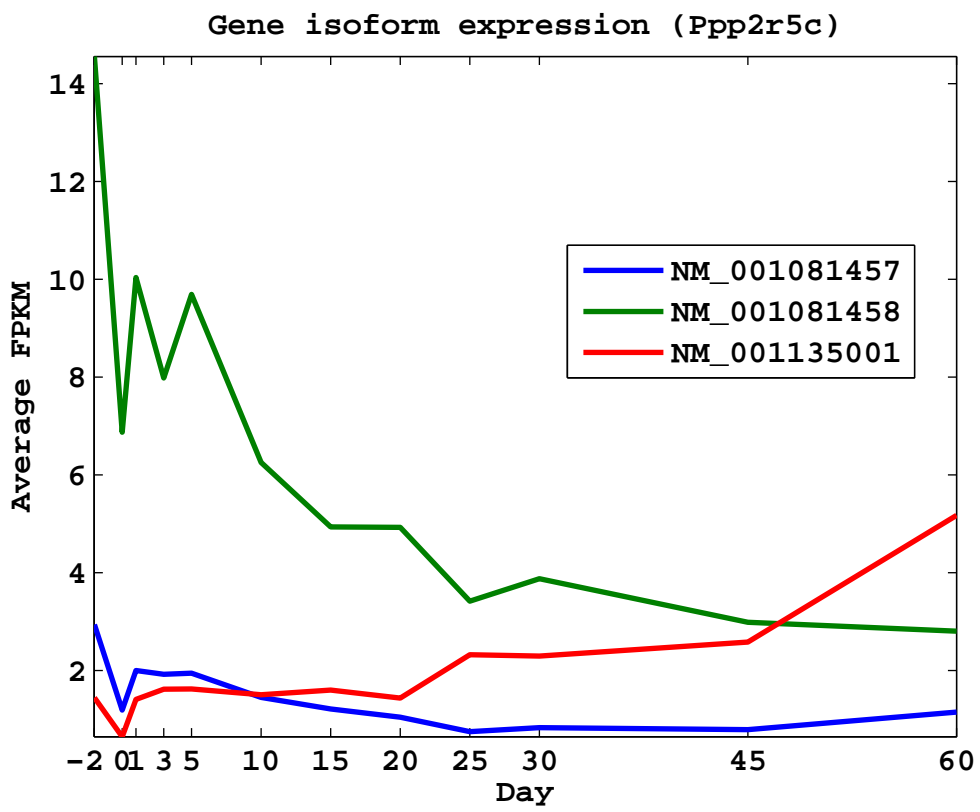

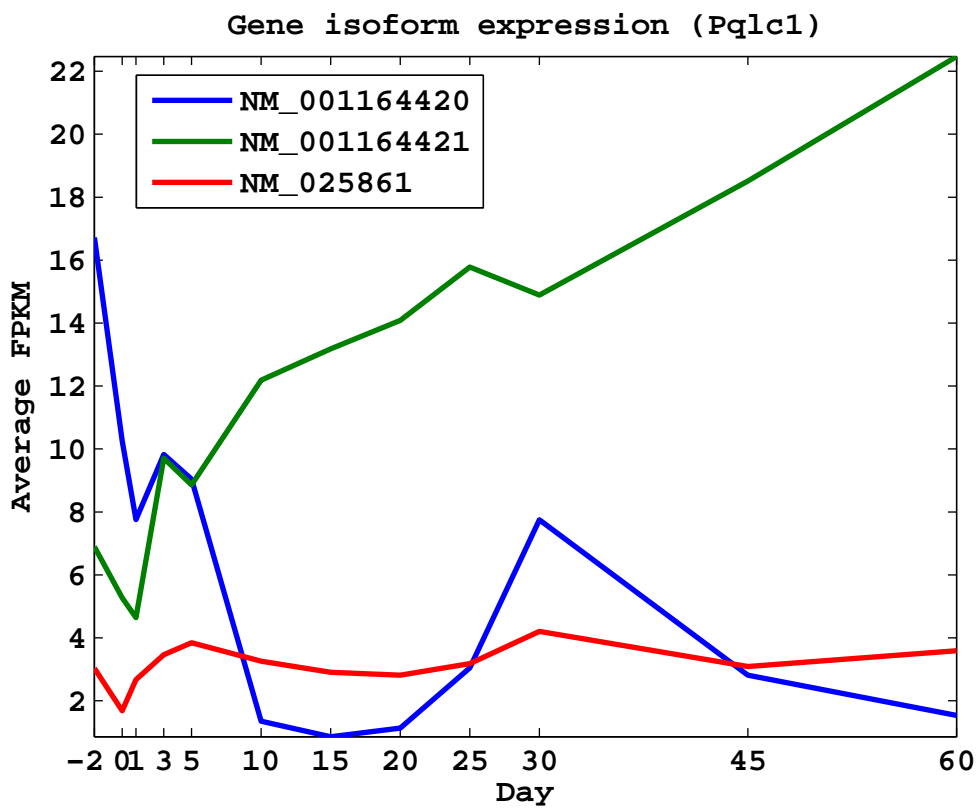

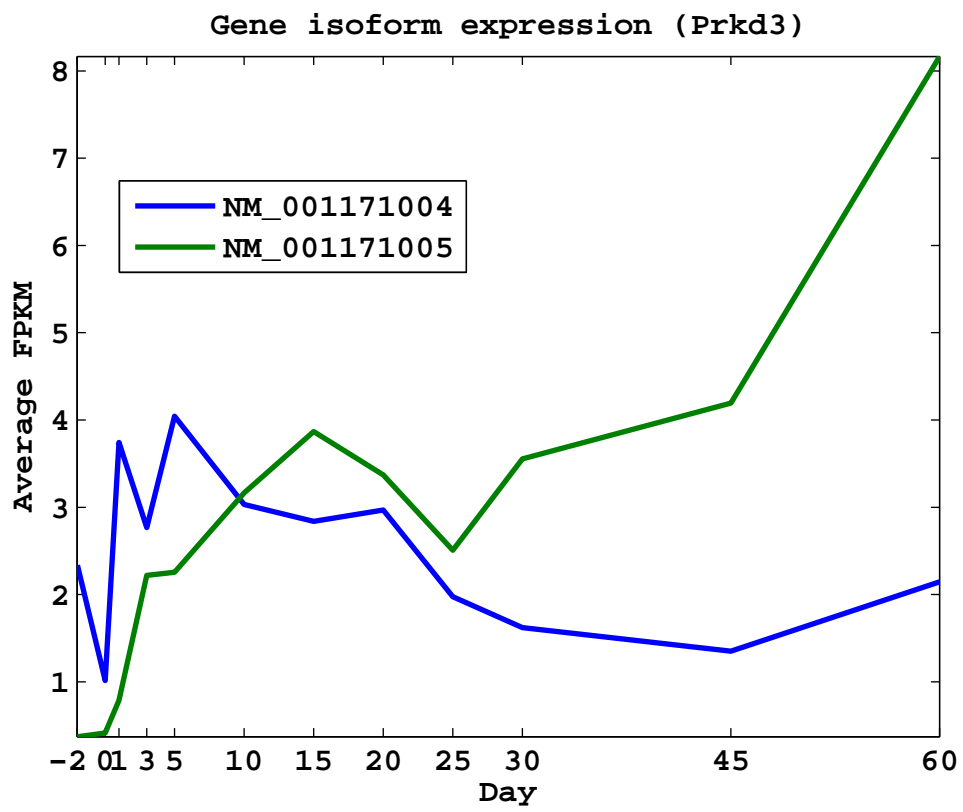

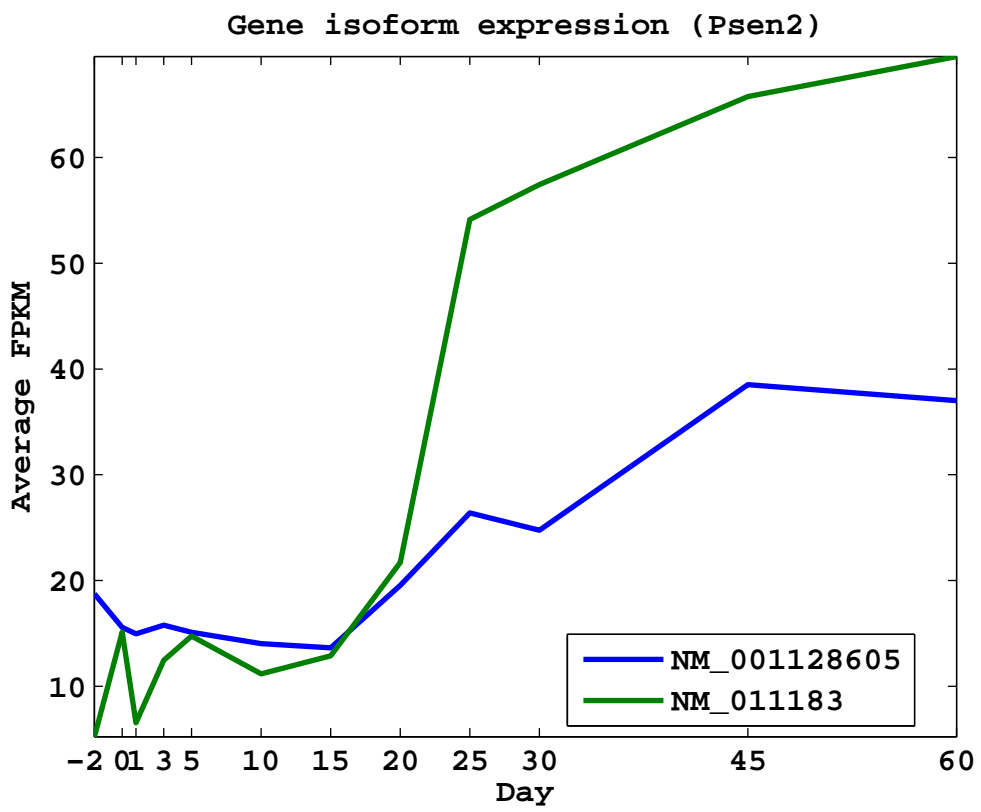

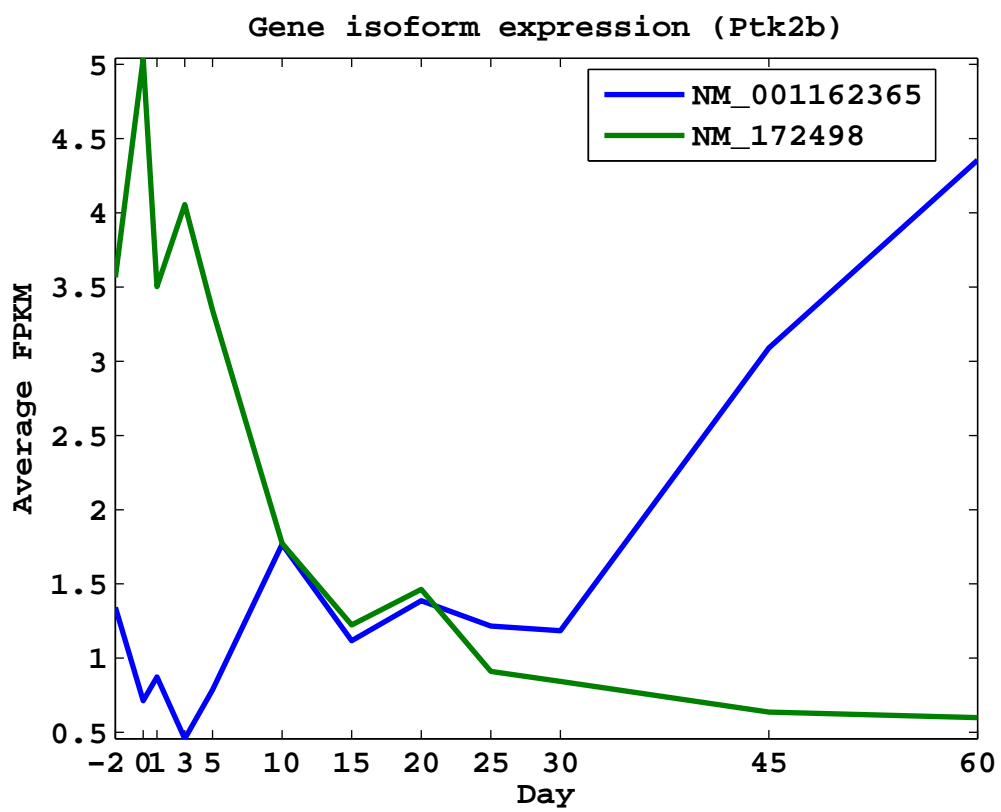

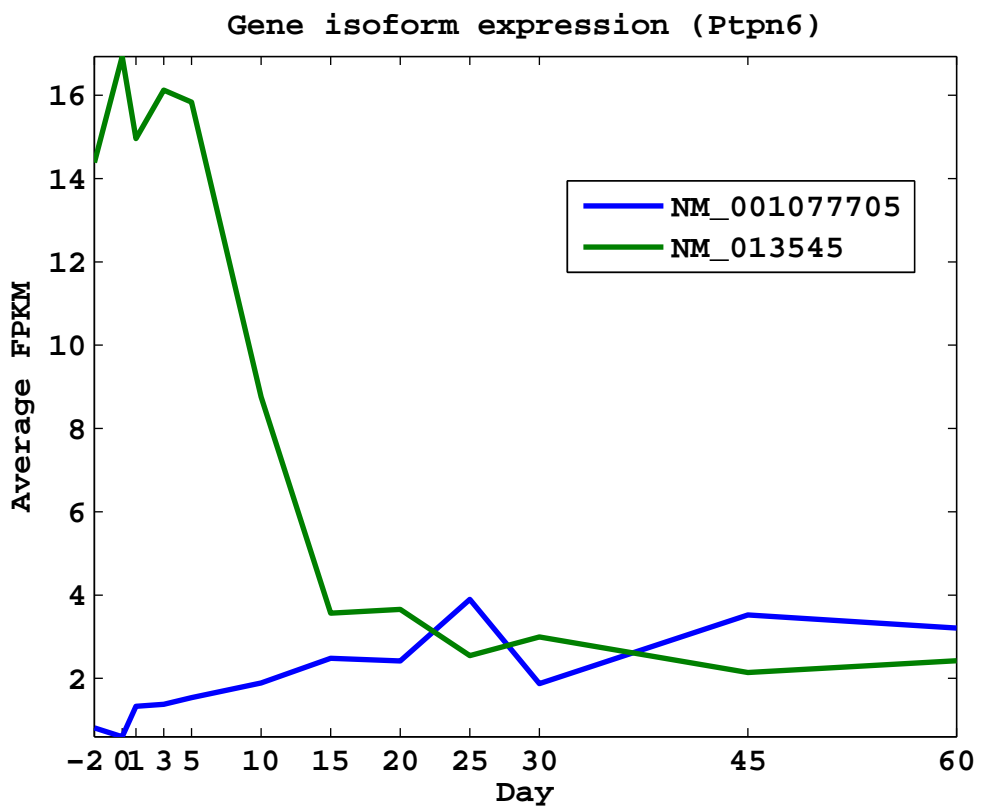

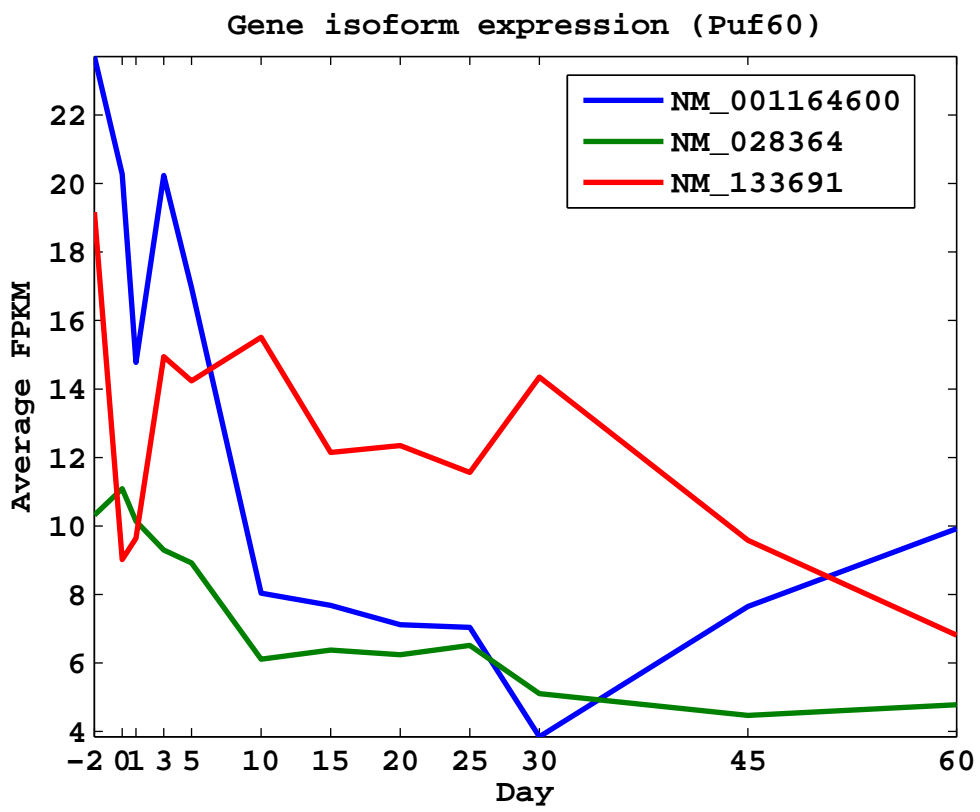



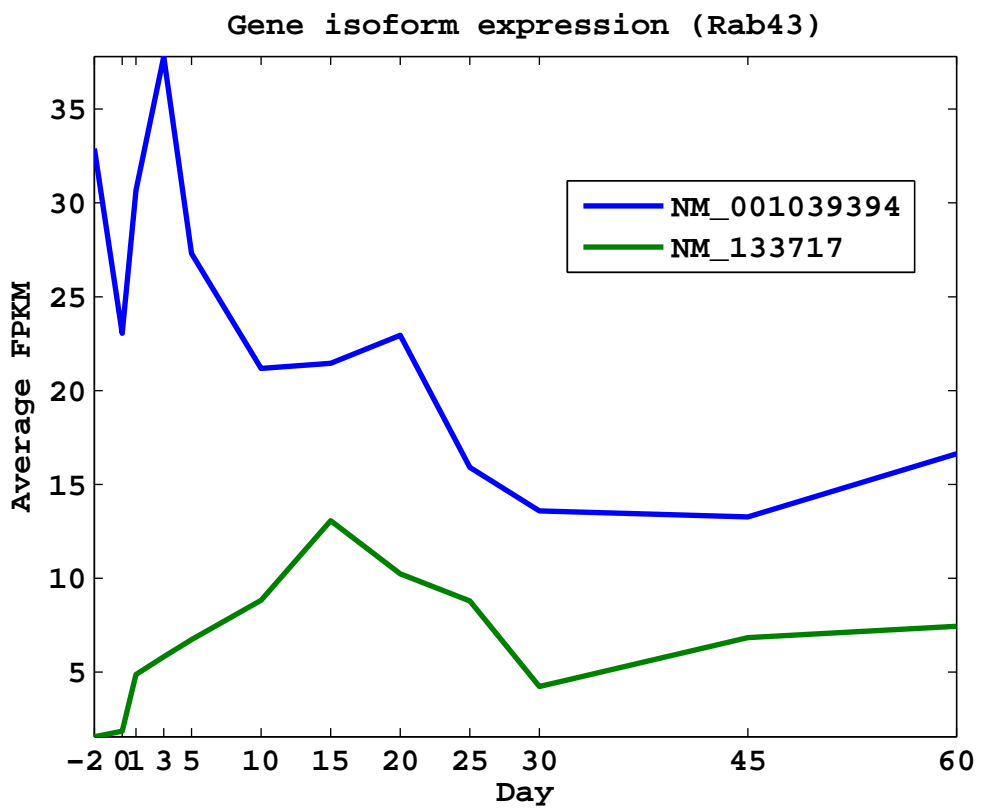

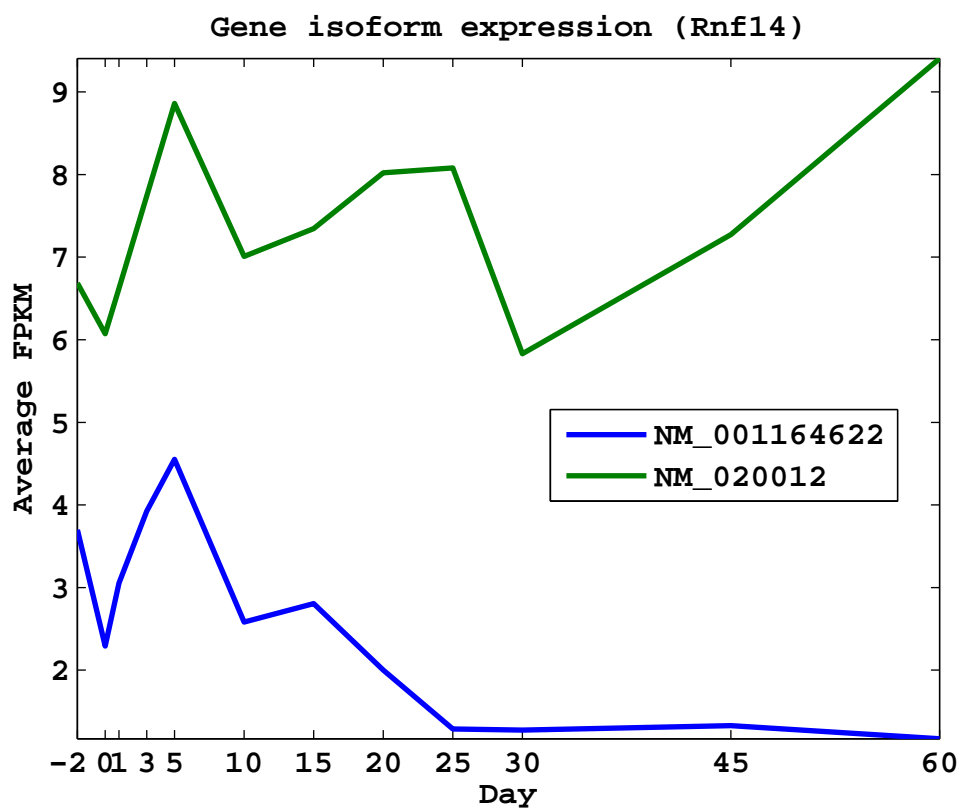

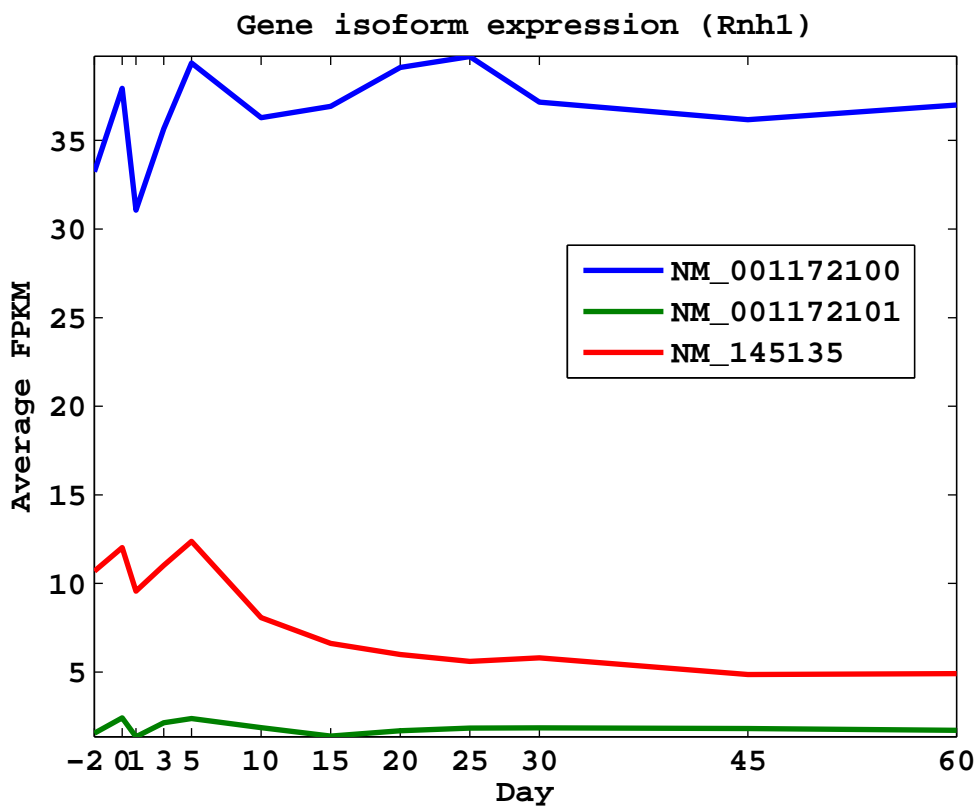

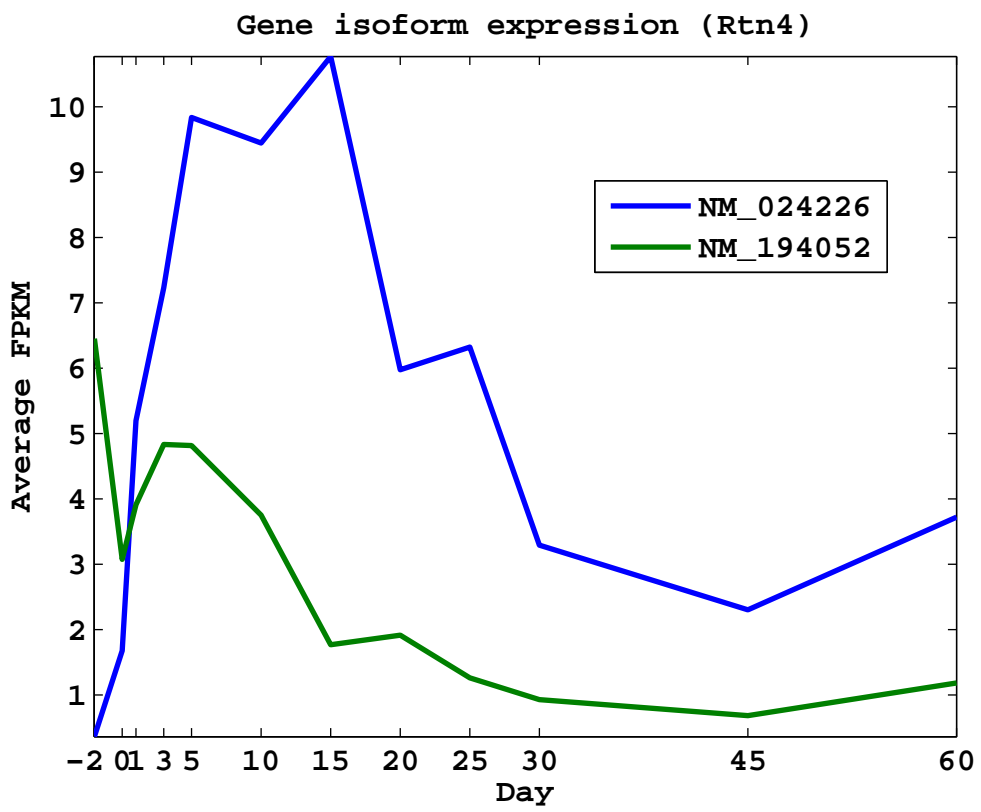

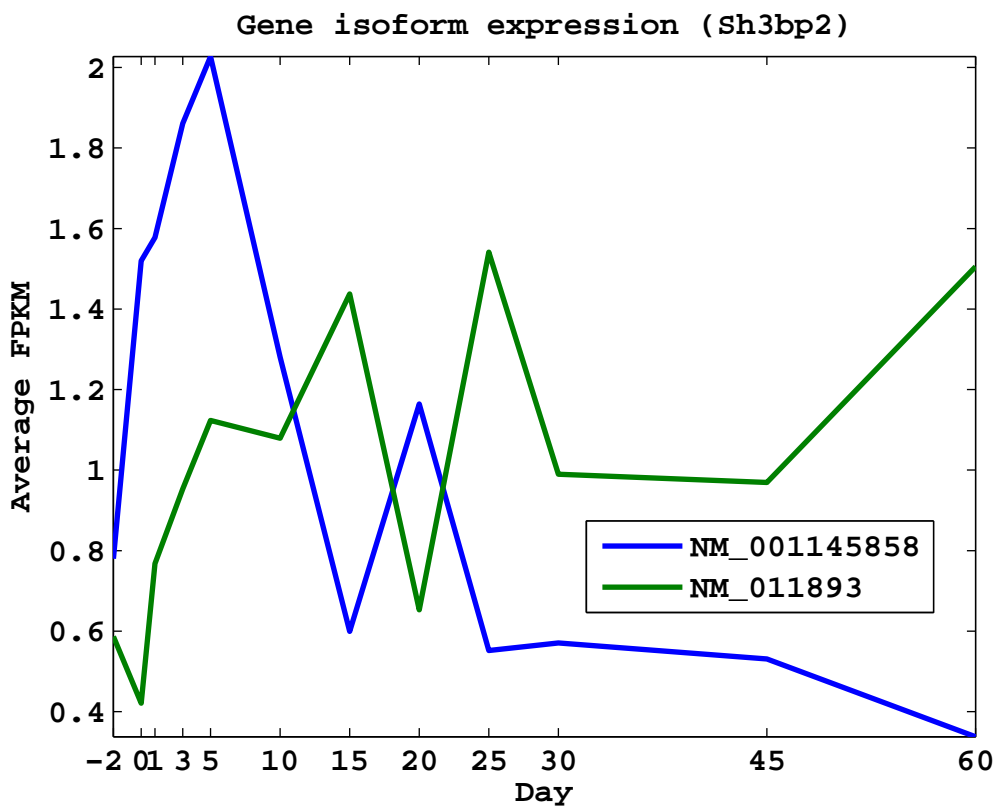

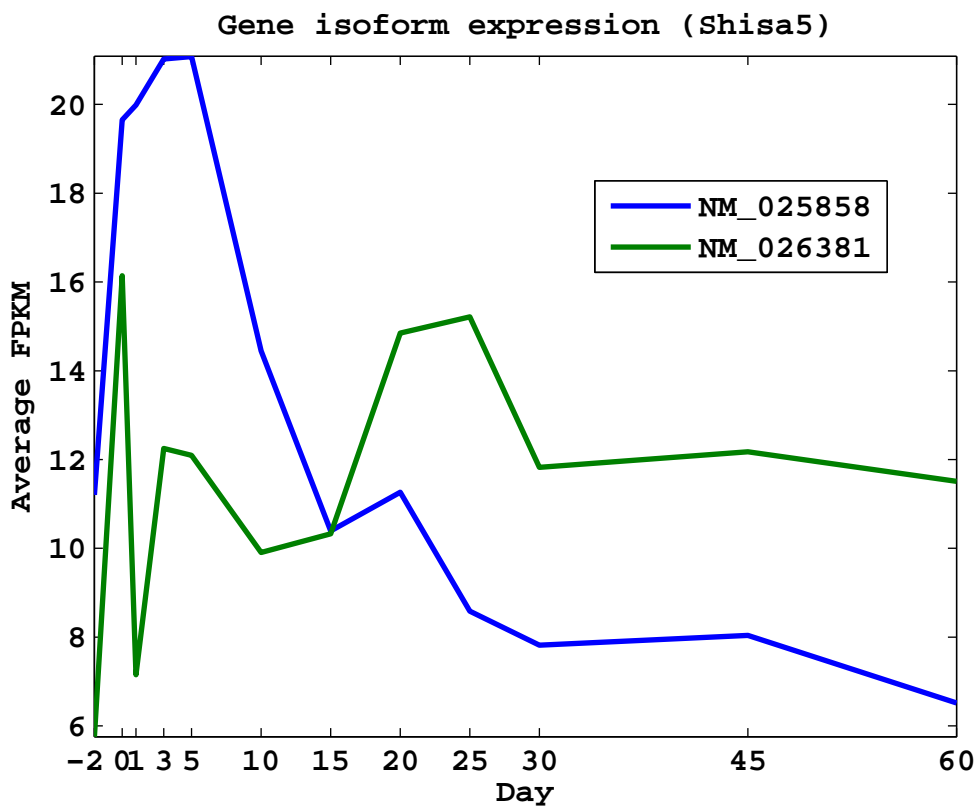

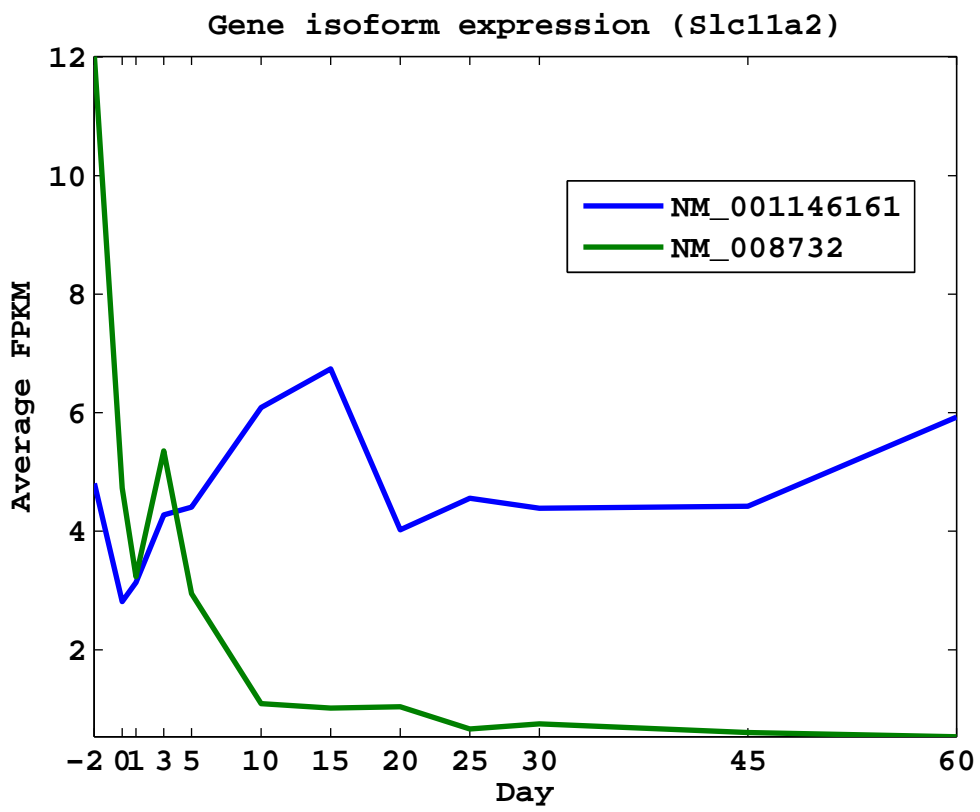

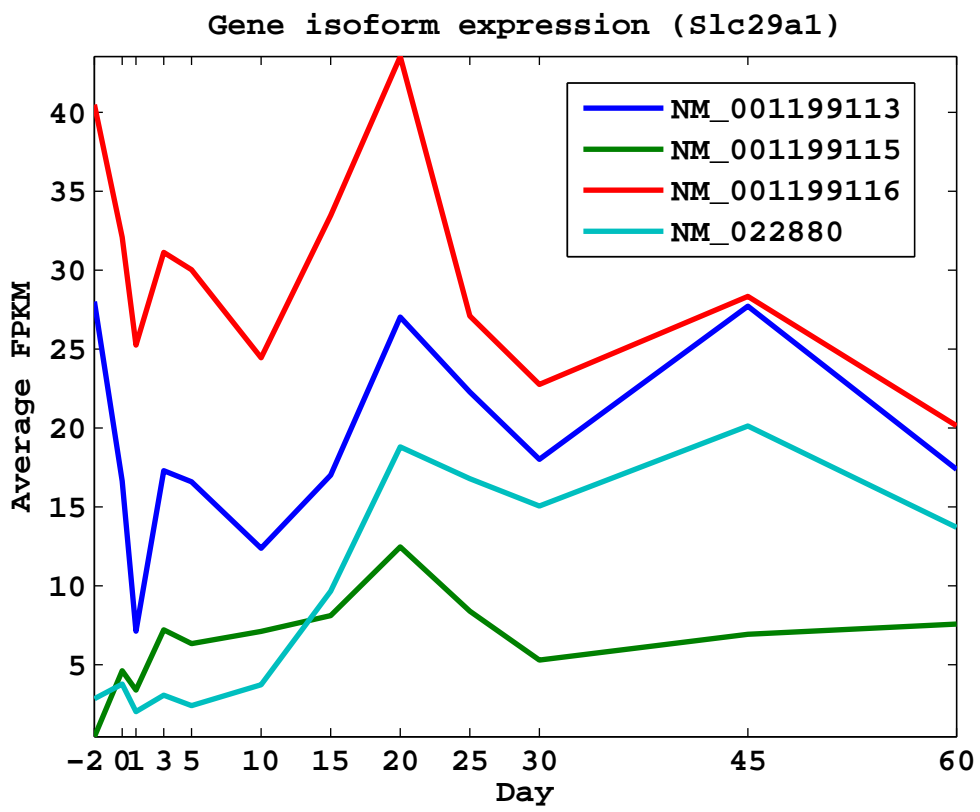



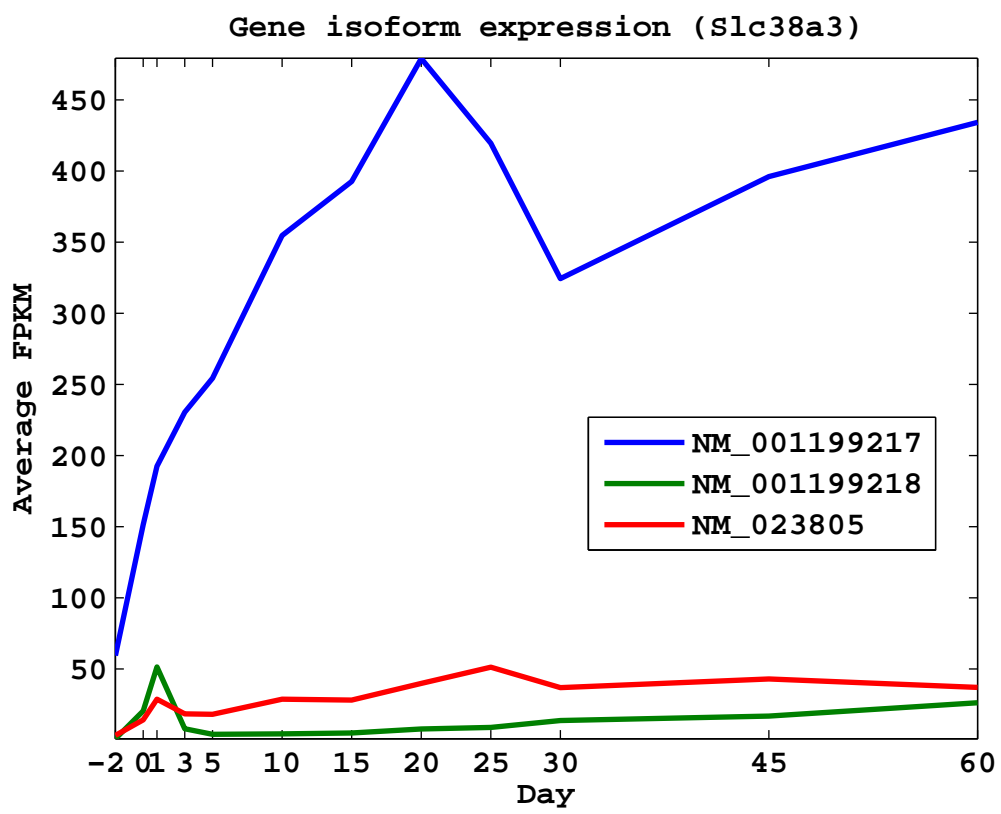

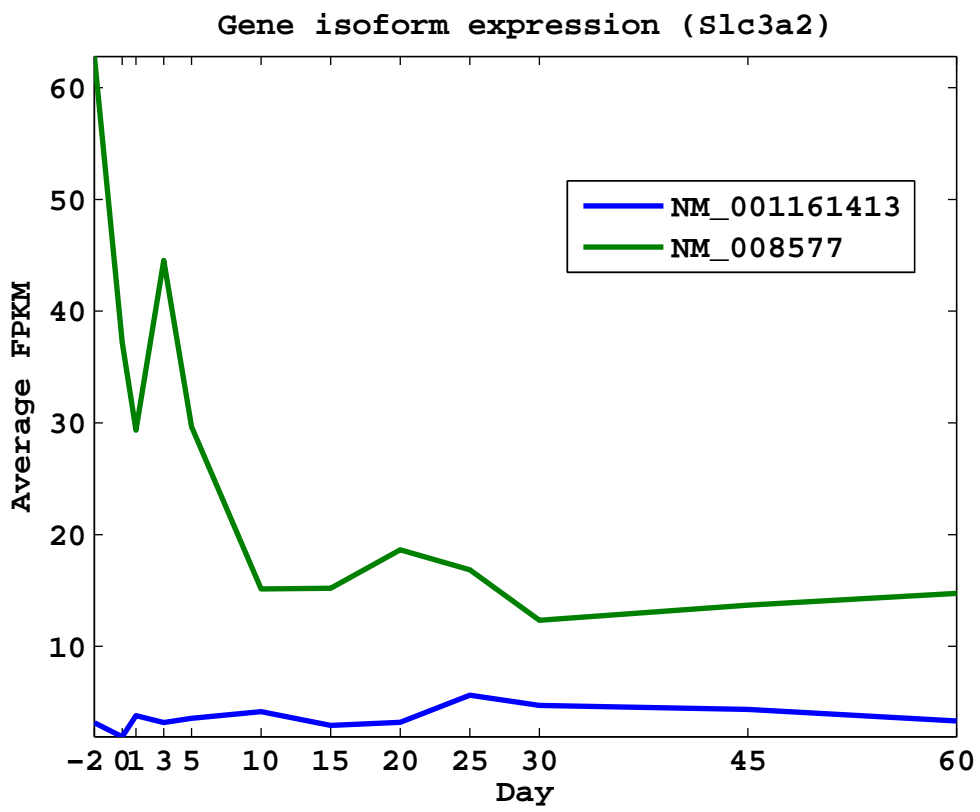

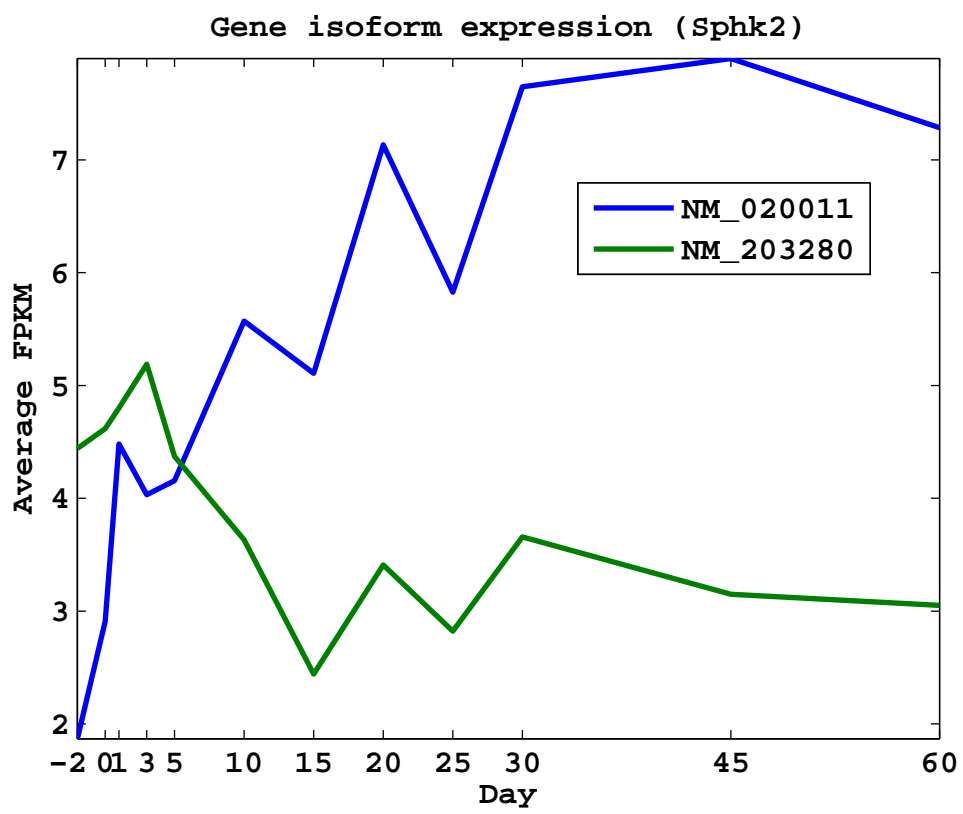

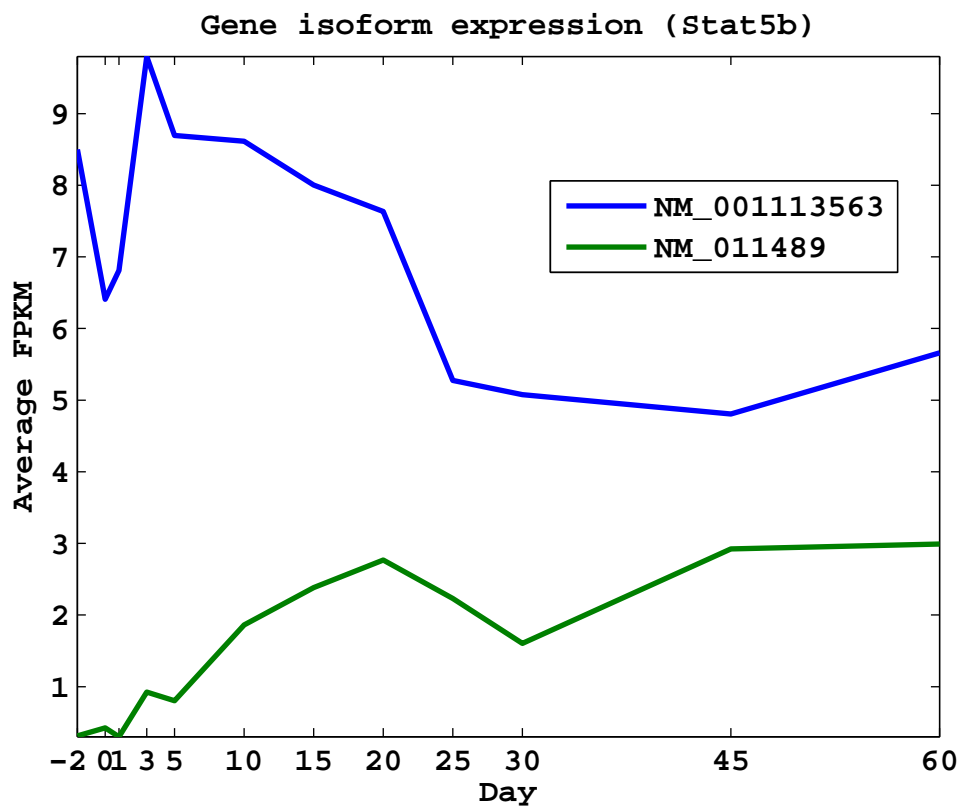

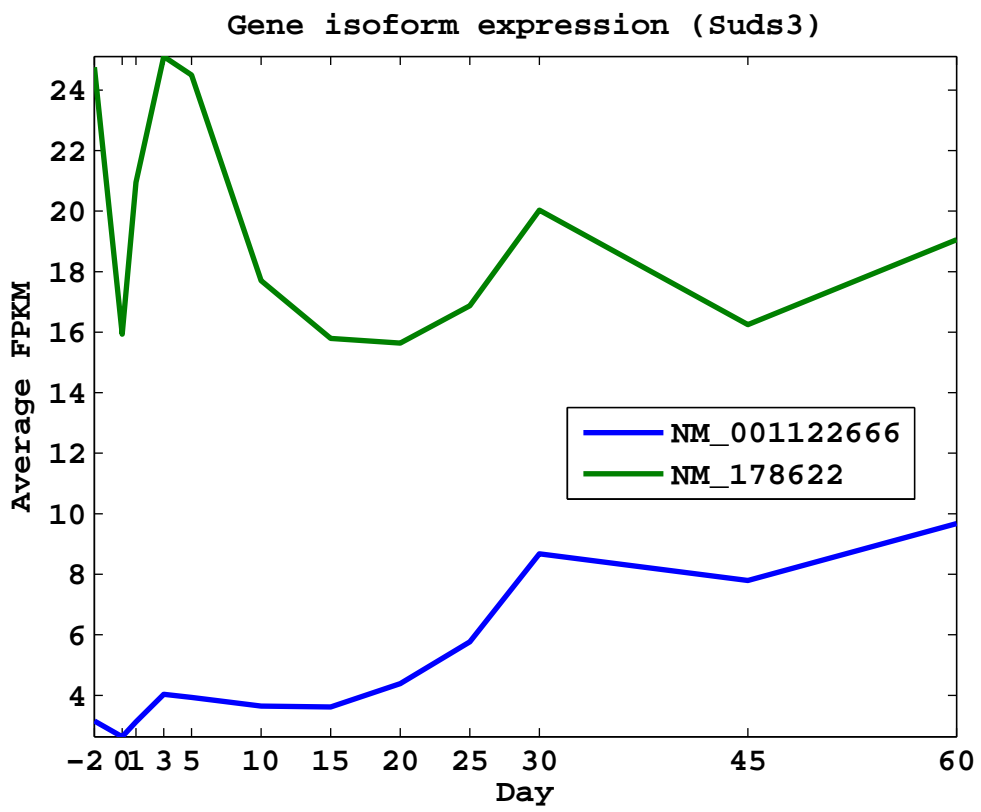

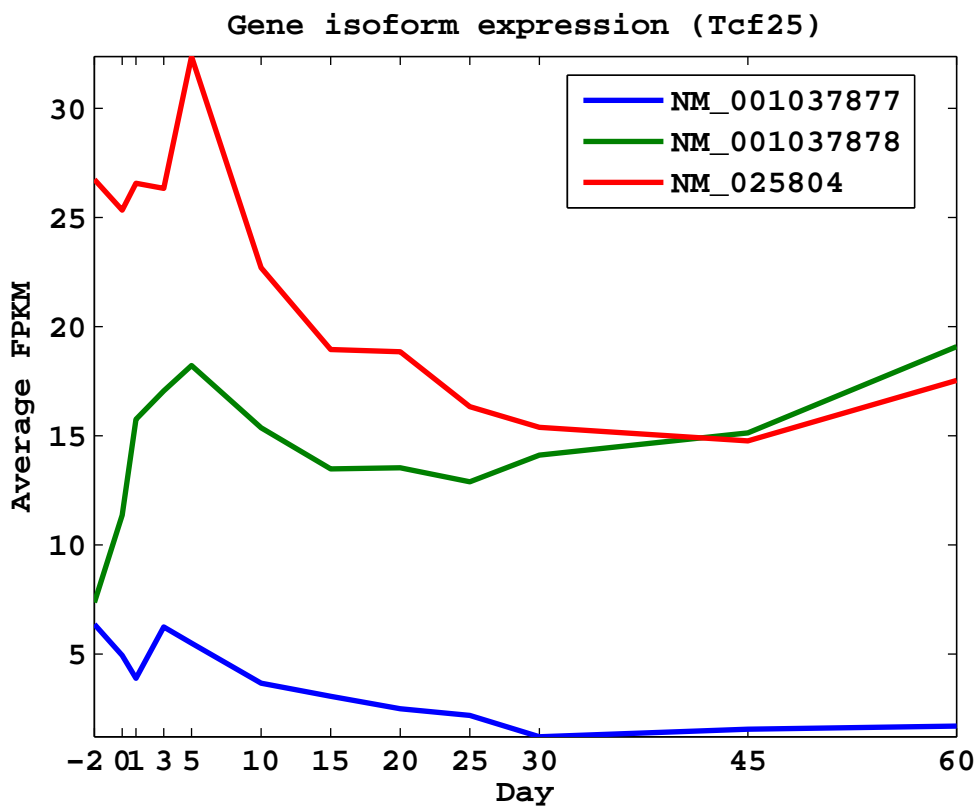

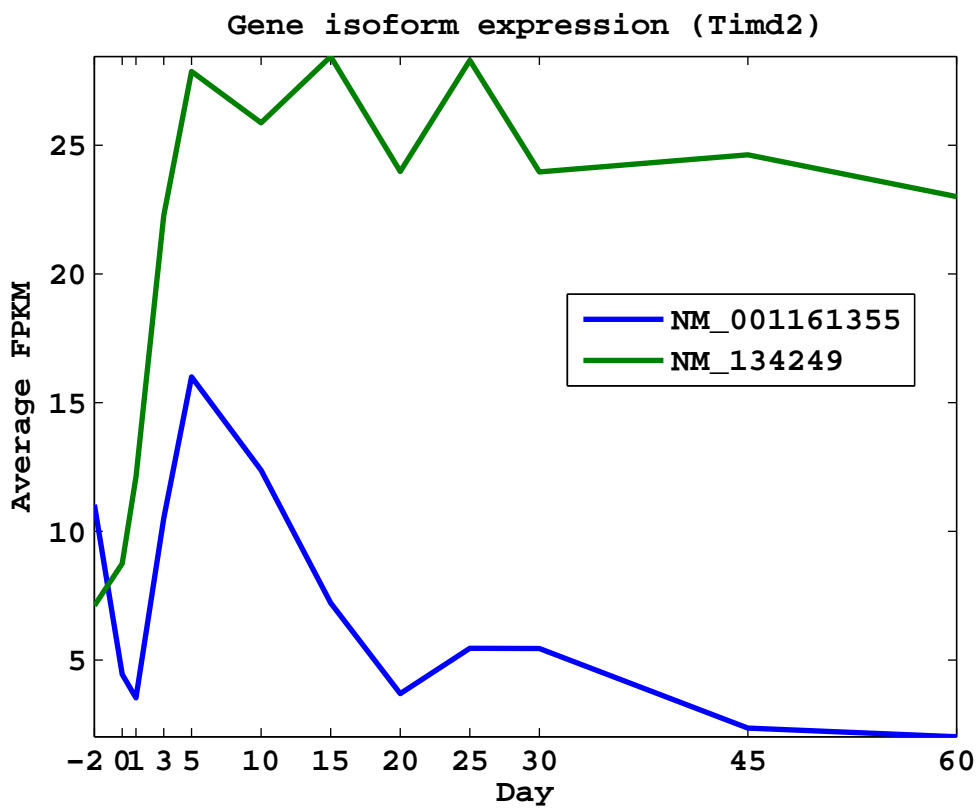

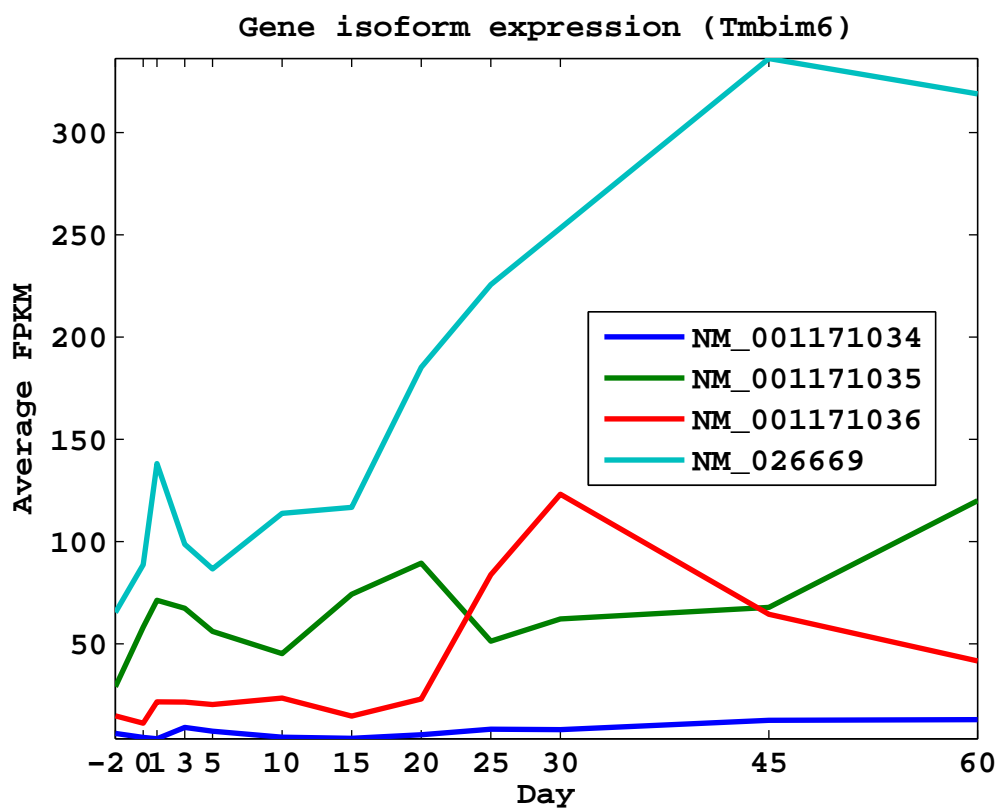



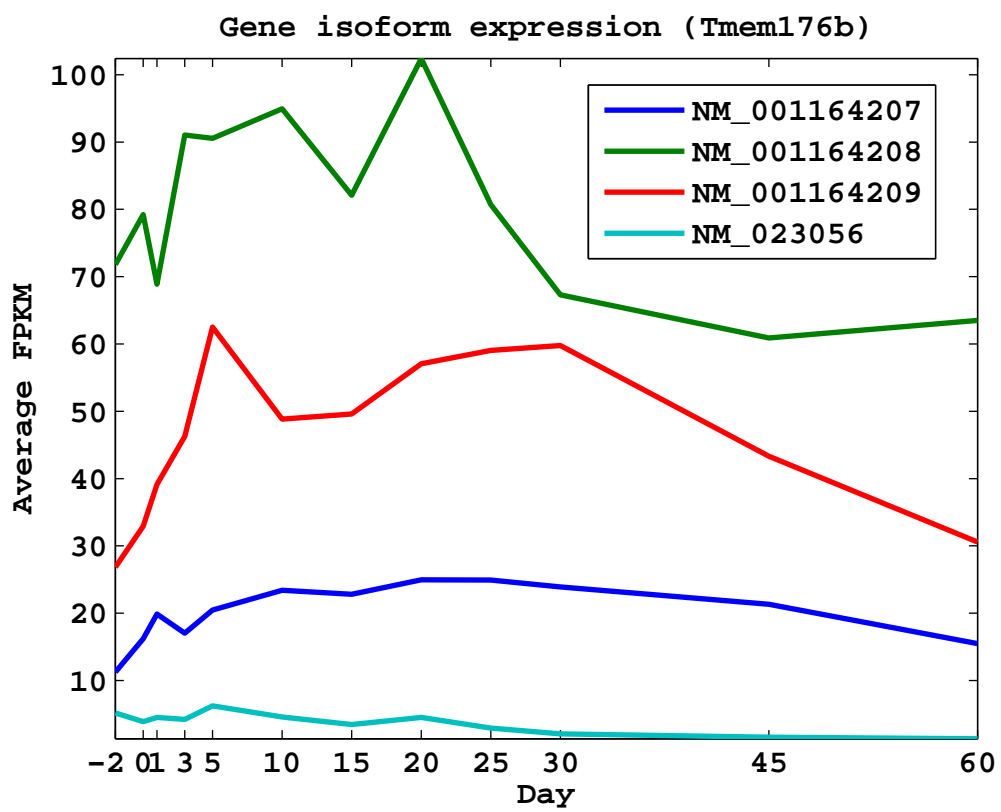

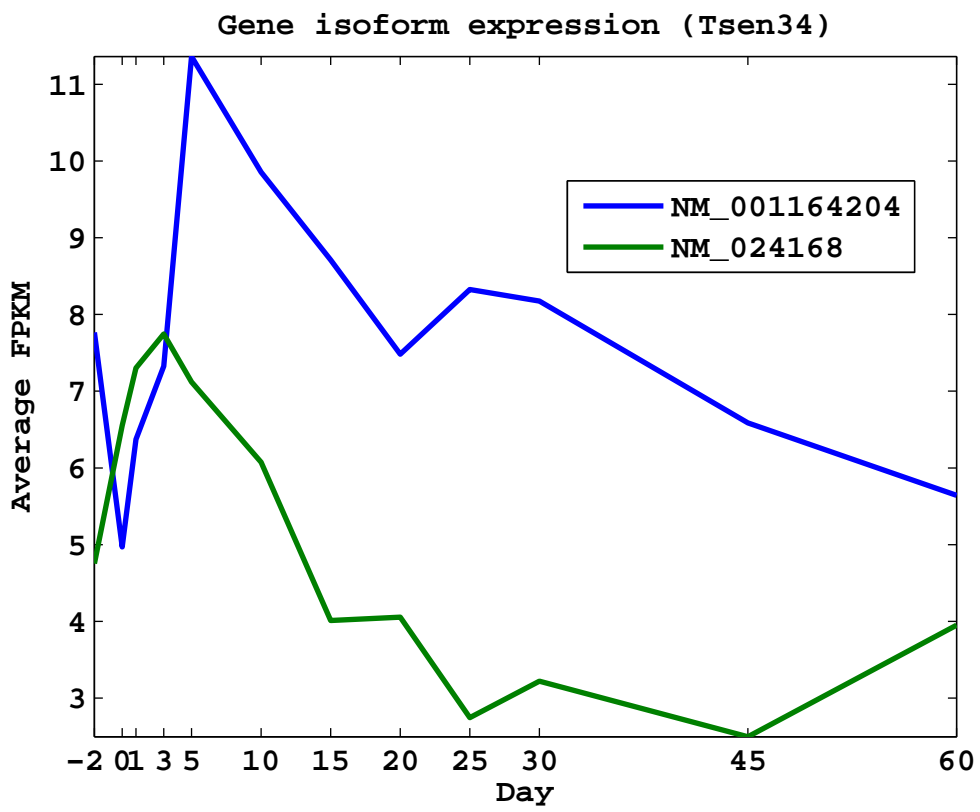

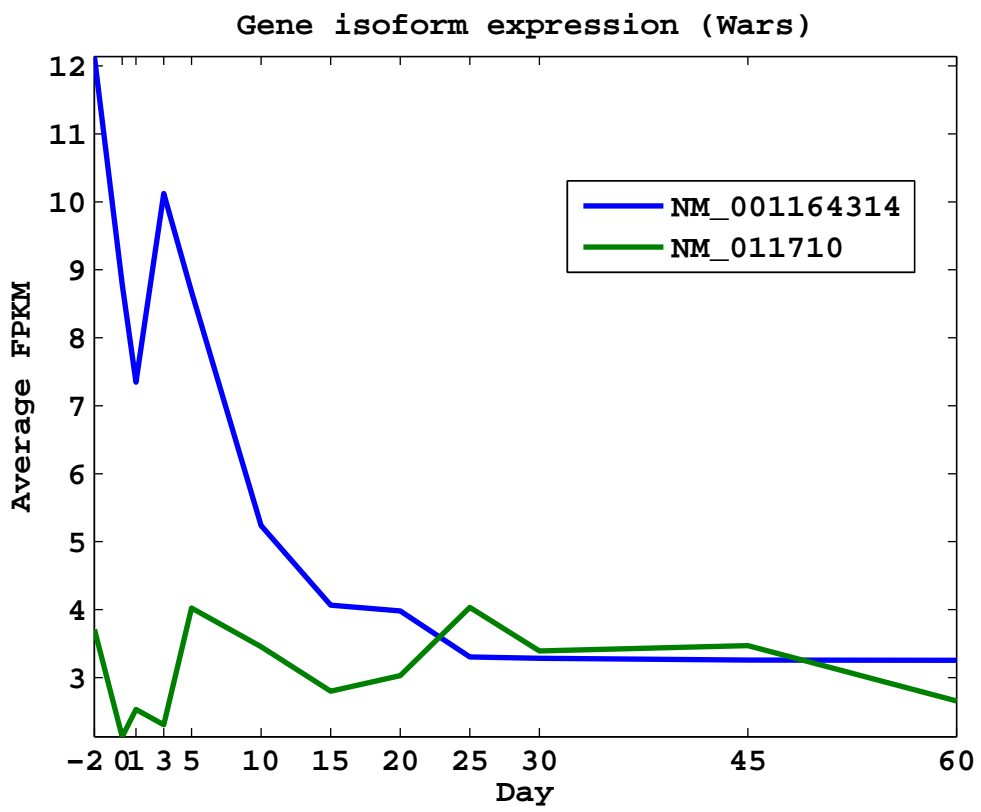

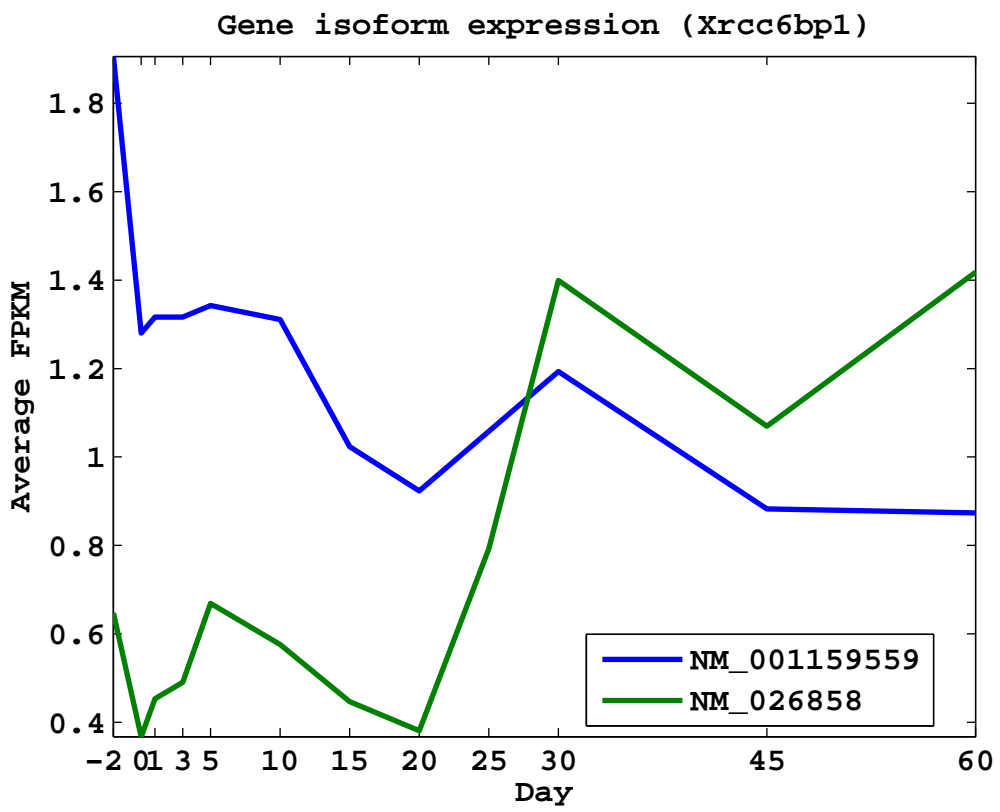

Supplement: pone.0141220.s004.pdf [file pone.0141220.s004.pdf]
