# Supplementary material for: Deciphering the Developmental Dynamics of the Mouse Liver Transcriptome
Source: PubMed Central journal article supplement (PMC4619800; doi:10.1371/journal.pone.0141220), 2015-10-23

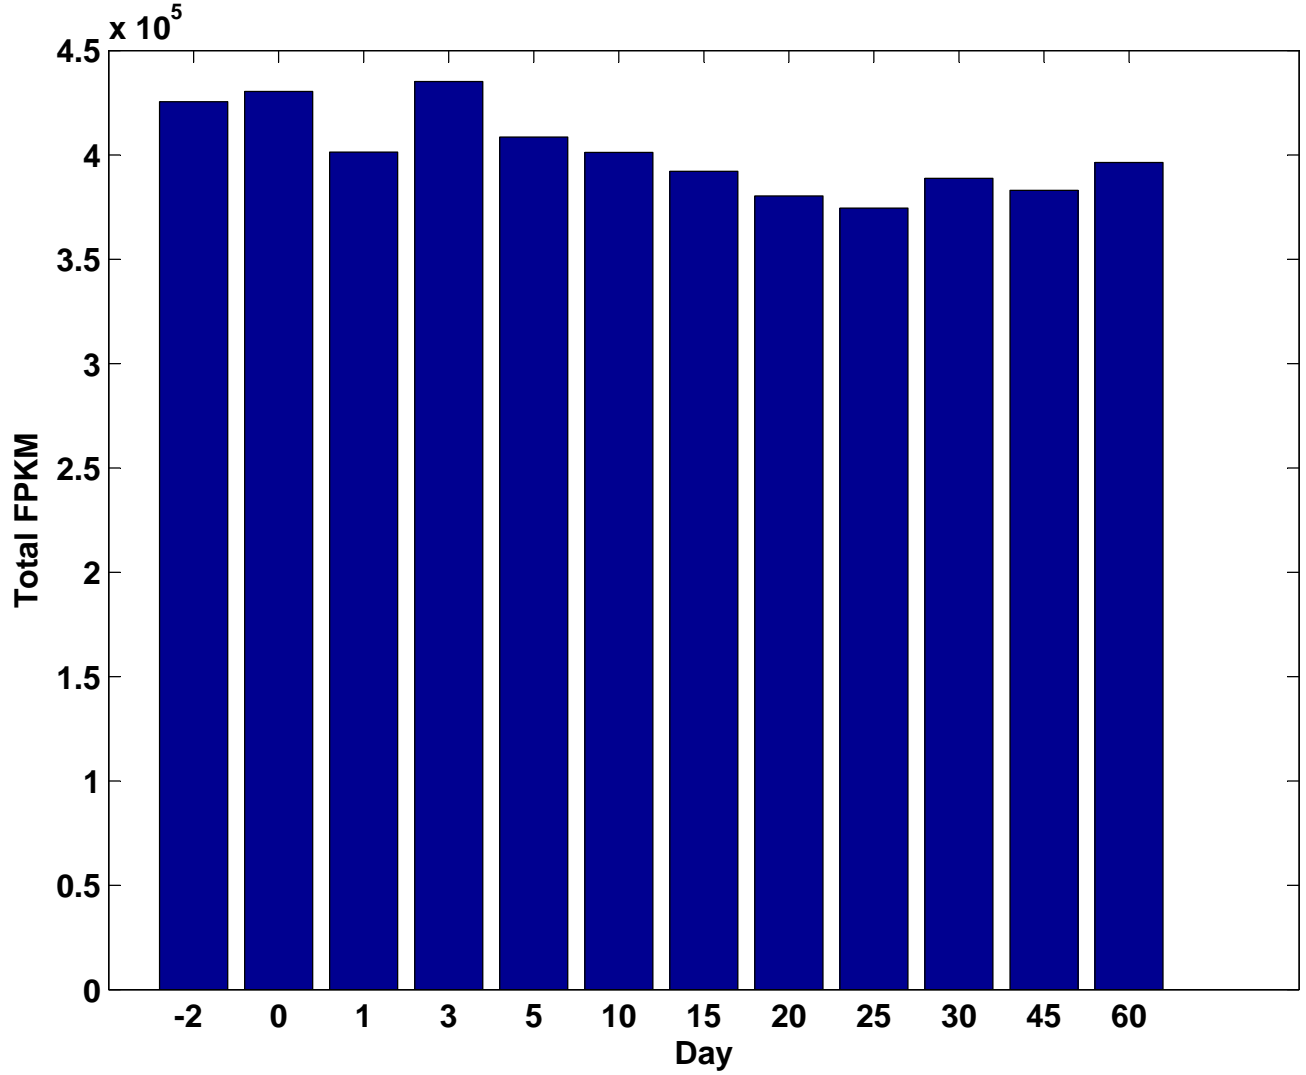

Supplement: pone.0141220.s002.pdf [file pone.0141220.s002.pdf]
