# Supplementary material for: Deciphering the Developmental Dynamics of the Mouse Liver Transcriptome
Source: PLoS One. 2015 Oct 23;10(10):e0141220. doi: 10.1371/journal.pone.0141220 (PMC4619800; doi:10.1371/journal.pone.0141220)
Supplement: S1 Table — (XLSX) [file pone.0141220.s007.xlsx]

## Sheet: Sheet1
Correlation between RNA-Seq and RT-PCR expression
Gene	Pearson Correlation
Igf2	0.962334
Gadd45a	0.856601
Afp	0.868522
Ccnd1	0.732946
Nfkbie	0.770134
Slco1b2 (Oatp1b2)	0.735625
Bsep (Abcb11)	0.807472
