# Supplementary material for: Deciphering the Developmental Dynamics of the Mouse Liver Transcriptome
Source: PLoS One. 2015 Oct 23;10(10):e0141220. doi: 10.1371/journal.pone.0141220 (PMC4619800; doi:10.1371/journal.pone.0141220)
Supplement: S13 Table — (XLSX) [file pone.0141220.s019.xlsx]

## Sheet: Sheet1
	Development dynamics of significant biological functions associated with the cluster of Adolescent and Adult genes
	Biological functions deemed unconnected to liver are downplayed.
			Activation Z-Score
	Category	Diseases or Functions Annotation	D-2	D0	D1	D3	D5	D10	D15	D20	D25	D30	D45	D60
A	Organismal Survival	organismal death	9.05	9.05	7.602	7.734	3.584	-1.944	-8.356	-9.05	-7.689	-5.499	-8.02	-8.14
	Inflammatory Response	inflammation of organ	4.436	4.436	3.591	4.436	1.81	-1.595	-4.436	-4.436	-3.687	-3.139	-3.157	-3.386
	Inflammatory Response	inflammation of body region	4.465	4.465	3.605	4.465	1.681	-1.881	-4.465	-4.465	-3.702	-3.145	-3.163	-2.977
	Nutritional Disease	weight loss	3.952	3.952	3.066	3.066	1.588	-1.884	-3.952	-3.952	-3.509	-2.401	-2.696	-2.401
	Protein Synthesis	quantity of enzyme	3.403	3.403	2.612	2.909	0.222	-2.167	-3.403	-3.403	-2.909	-1.92	-2.909	-2.414
	Inflammatory Response	inflammation of body cavity	3.428	3.428	2.761	3.567	1.579	-1.412	-3.428	-3.428	-2.385	-1.968	-3.011	-3.011
	Neurological Disease	Movement Disorders	2.814	2.814	1.709	2.814	2.106	0.152	-2.814	-2.814	-2.247	-1.568	-2.247	-2.814
	Small Molecule Biochemistry	quantity of ammonia in blood	2.393	2.393	1.481	2.393	2.393	1.709	-2.393	-2.393	-2.393	-1.709	-2.393	-2.393
	Organismal Injury and Abnormalities	oxidative stress	2.96	2.96	2.96	2.396	1.832	1.081	-2.96	-2.96	-2.96	-2.96	-2.96	-2.96
	Gastrointestinal Disease, Hepatic System Disease	hepatic steatosis	2.611	2.611	1.957	2.175	0.502	-0.225	-2.611	-2.175	-2.611	-2.611	-3.048	-2.611
	Cardiovascular Disease, Cellular Compromise, Organismal Injury and Abnormalities	damage of endothelial cells	2	2	2	1	2	-2	-2	-2	-2	-1	-2	-2
	Cardiovascular Disease, Hematological Disease, Organismal Injury and Abnormalities, Renal and Urological Disease	thrombosis of kidney	2	2	2	2	2	-1	-2	-2	-2	-2	-2	-1
	Cell Death and Survival, Gastrointestinal Disease, Hepatic System Disease	focal necrosis of liver	2.2	2.2	1	1.4	1	-1.4	-2.2	-2.2	-2.2	-2.2	-2.2	-1.4
	Cell Death and Survival, Gastrointestinal Disease, Hepatic System Disease	necrosis of liver	1.815	1.815	0.818	1.34	1.056	-0.51	-2.171	-1.815	-1.815	-1.815	-1.815	-1.246
	Inflammatory Disease	chronic inflammatory disorder	1.759	1.759	1.508	1.089	-0.168	-1.34	-2.262	-1.759	-1.759	-2.262	-1.257	-0.754
	Protein Synthesis	quantity of aspartate transaminase in blood	2.219	2.219	1.109	2.219	-0.555	-1.387	-2.219	-2.219	-2.219	-1.387	-1.387	-1.387
	Protein Synthesis	quantity of GPT in blood	2.425	2.425	1.455	1.698	-0.97	-1.455	-2.425	-2.425	-1.698	-0.97	-2.425	-2.425
	Digestive System Development and Function, Gastrointestinal Disease, Hepatic System Development and Function, Hepatic System Disease, Inflammatory Disease, Inflammatory Response, Organ Development	inflammation of liver	2.736	2.736	1.929	2.198	0.673	-1.121	-2.736	-2.736	-2.198	-1.66	-2.198	-2.198
	Inflammatory Disease, Inflammatory Response, Organismal Injury and Abnormalities, Renal and Urological Disease	Nephritis	2.562	2.562	2.562	2.071	1.089	-0.679	-2.562	-2.562	-2.562	-1.089	-1.58	-2.071
	Cardiovascular Disease	vascular disease	2.637	2.637	2.352	2.266	0.322	-0.17	-2.637	-2.352	-2.637	-0.829	-1.924	-2.281
	Cardiovascular Disease	disorder of artery	2.162	2.162	1.812	1.812	0.374	0.663	-2.162	-1.812	-2.22	-1.346	-1.346	-1.987
	Dermatological Diseases and Conditions	keratosis	2.236	2.236	1.342	2.236	0.447	0.447	-2.236	-2.236	-1.342	-0.447	-2.236	-2.236
	Organismal Injury and Abnormalities, Renal and Urological Disease	urination disorder	2.054	2.054	2.054	1.551	0.88	-0.545	-2.054	-2.054	-1.551	-0.88	-1.886	-1.886
	Cardiovascular Disease, Hematological Disease	Thrombosis	1.899	1.899	1.899	1.407	1.161	-0.317	-1.899	-1.899	-2.392	-0.504	-1.899	-1.161
	Cardiovascular Disease, Organismal Injury and Abnormalities	formation of vascular lesion	1.485	1.485	0.423	2.149	-0.241	-0.241	-1.485	-0.822	-0.822	-0.158	-0.822	-1.485
B	Lipid Metabolism, Molecular Transport, Small Molecule Biochemistry	accumulation of cholesterol	0.194	0.194	0.194	0.194	-1.002	2.042	-0.194	-0.194	-0.194	0.152	-0.194	-0.887
	Post-Translational Modification, Protein Degradation, Protein Synthesis	molecular cleavage of protein fragment	0.469	0.469	-0.18	0.469	0.469	2.2	0.18	-0.469	-0.469	0.18	-0.469	-0.469
	Amino Acid Metabolism	quantity of amino acids	0.117	0.117	0.117	0.463	0.749	2.152	-0.117	-0.117	-0.463	-1.809	-0.117	-0.364
	Amino Acid Metabolism, Drug Metabolism, Endocrine System Development and Function, Molecular Transport, Small Molecule Biochemistry	concentration of levothyroxine	-0.743	-0.743	-0.743	-0.743	0.951	2.407	0.743	0.743	0.743	-0.713	0.743	-0.327
	Protein Synthesis	quantity of protein lipid complex in blood	-1.143	-1.143	-1.143	0.382	0.178	2.293	1.143	1.143	1.143	0.533	1.143	-0.077
	Post-Translational Modification, Protein Degradation, Protein Synthesis	proteolysis	-0.945	-0.945	-1.188	-0.945	-0.397	2.465	1.188	0.397	0.945	0.64	0.945	0.215
	Protein Synthesis	metabolism of protein	-1.263	-1.263	-0.924	-1.263	0.073	2.324	0.924	0.882	1.263	0.669	1.263	1.454
	Cardiovascular System Development and Function, Cell Death and Survival	cell viability of endothelial cells	-1	-1	-1	-1	0.6	0.2	1	1	0.2	-1.4	0.2	2.2
	Cellular Development, Cellular Growth and Proliferation, Hepatic System Development and Function, Tissue Development	proliferation of hepatocytes	-0.445	-0.445	-2.027	-0.445	0.148	-0.148	0.445	0.445	0.643	-0.939	1.038	1.335
	Lipid Metabolism, Small Molecule Biochemistry, Vitamin and Mineral Metabolism	synthesis of terpenoid	-0.841	-0.841	-1.405	-0.502	-0.531	-0.757	0.841	0.841	1.451	-0.587	0.841	2.241
	Cellular Development, Cellular Growth and Proliferation, Hepatic System Development and Function	proliferation of liver cells	-1.111	-1.111	-2.445	-1.111	-0.611	-0.278	1.111	1.111	1.278	-0.056	1.611	1.861
	Endocrine System Development and Function	glucose tolerance	-1.173	-1.173	-0.921	-1.173	-1.089	0.586	1.173	0.67	0.168	0.67	2.178	0.67
	Lipid Metabolism, Molecular Transport, Small Molecule Biochemistry	transport of cholesterol	-1	-1	-1	-1	-2	-2	1	1	1	1	1	1
	Lipid Metabolism, Molecular Transport, Small Molecule Biochemistry	secretion of lipid	-1.544	-1.544	-0.947	-0.396	-1.345	-0.649	1.544	1.544	1.544	0.947	1.544	2.539
	Cellular Function and Maintenance	uptake of cells	-1.671	-1.671	-1.671	-1.671	-0.186	0.186	1.671	1.671	0.928	0.928	0.928	2.414
	Lipid Metabolism, Small Molecule Biochemistry, Vitamin and Mineral Metabolism	metabolism of terpenoid	-1.827	-1.827	-1.827	-1.434	-0.435	-0.461	1.827	1.827	2.415	0.631	1.827	2.807
C	Lipid Metabolism, Molecular Transport, Small Molecule Biochemistry	release of cholesterol	-2.219	-2.219	-2.219	-1.109	0.555	0.555	2.219	2.219	2.219	1.387	2.219	1.387
	Protein Synthesis	quantity of hdl cholesterol in blood	-2.276	-2.276	-2.276	-0.283	0.514	2.108	2.276	2.276	2.276	1.479	2.276	0.682
	Gastrointestinal Disease	injury of gastrointestinal tract	-2.02	-2.02	-2.02	-2.02	-0.404	2.02	2.02	2.02	1.414	1.414	2.02	2.02
	Cardiovascular Disease, Organismal Injury and Abnormalities, Renal and Urological Disease	reperfusion injury of kidney	-2.236	-2.236	-2.236	-2.236	-0.447	2.236	2.236	2.236	1.342	1.342	2.236	2.236
	Infectious Disease	infection of leukocyte cell lines	-2.213	-2.213	-2.213	-2.213	-1.432	2.213	2.213	2.213	1.432	1.432	2.213	2.213
	Free Radical Scavenging	metabolism of reactive oxygen species	-2.087	-2.087	-1.293	-2.087	-1.917	1.974	2.427	2.087	1.809	0.787	2.087	2.087
	Endocrine System Development and Function, Small Molecule Biochemistry	conversion of hormone	-2.201	-2.201	-1.506	-2.201	-1.159	1.506	2.201	2.201	2.201	2.201	2.201	2.201
	Cell Death and Survival	cell viability of melanoma cell lines	-2.183	-2.183	-2.183	-2.183	-1.467	1.109	0.394	2.183	2.183	1.038	2.183	2.183
	Cellular Movement, Immune Cell Trafficking	leukocyte migration	-2.119	-2.119	-2.358	-2.812	-1.243	0.783	2.119	1.8	2.152	1.642	2.146	1.407
	Cellular Movement, Hematological System Development and Function, Immune Cell Trafficking, Inflammatory Response	cell movement of phagocytes	-2.019	-2.019	-2.316	-2.415	-1.359	1.683	2.019	1.623	1.642	1.305	2.019	0.75
D	Cell-To-Cell Signaling and Interaction, Hematological System Development and Function	binding of leukocytes	-2.088	-2.088	-2.088	-2.088	-1.039	1.325	2.088	2.088	-0.01	0.849	1.325	1.516
	Cell-To-Cell Signaling and Interaction	binding of blood cells	-2.023	-2.023	-2.023	-2.023	-1.126	1.37	2.023	2.023	-0.26	0.474	1.37	1.533
	Cell-To-Cell Signaling and Interaction	binding of cells	-2.435	-2.435	-2.435	-2.435	-0.531	1.298	2.435	2.118	0.077	0.553	1.113	2.118
	Organismal Development	mass of organism	-2.53	-2.53	-2.339	-2.148	-0.941	1.131	2.148	2.53	1.386	1.131	2.148	1.958
	Lipid Metabolism, Molecular Transport, Small Molecule Biochemistry	transport of lipid	-2.554	-2.554	-2.153	-1.475	-1.485	0.317	2.554	2.554	1.307	1.307	2.02	2.554
	Lipid Metabolism, Small Molecule Biochemistry	synthesis of lipid	-2.246	-2.246	-2.679	-1.668	-1.311	0.654	2.246	2.493	1.595	0.079	2.246	2.939
	Lipid Metabolism, Small Molecule Biochemistry	degradation of lipid	-2.401	-2.401	-1.372	-1.715	-1.029	1.029	2.401	2.401	1.715	-0.343	2.401	1.715
	Lipid Metabolism, Molecular Transport, Small Molecule Biochemistry	release of prostaglandin	-2.186	-2.186	-2.186	-2.186	-2.186	0.937	2.186	2.186	1.406	0.625	2.186	2.186
	Cell-To-Cell Signaling and Interaction, Hematological System Development and Function, Immune Cell Trafficking, Inflammatory Response	activation of myeloid cells	-2.207	-2.207	-2.207	-1.719	-2.207	1.352	2.696	2.207	0.546	0.546	2.574	2.879
	Cell-To-Cell Signaling and Interaction, Hematological System Development and Function, Immune Cell Trafficking, Inflammatory Response	activation of phagocytes	-2.23	-2.23	-2.23	-1.749	-2.591	0.77	2.711	2.23	1.076	1.076	2.591	2.891
	Cell-To-Cell Signaling and Interaction, Hematological System Development and Function, Immune Cell Trafficking, Inflammatory Response	activation of leukocytes	-2.087	-2.087	-2.393	-1.985	-2.393	0.647	2.8	2.087	0.846	0.541	2.087	2.648
	Nucleic Acid Metabolism, Small Molecule Biochemistry	metabolism of nucleotide	-2.324	-2.324	-2.324	-2.324	-2.324	-0.282	2.324	1.673	0.804	-0.5	2.324	2.324
	Lipid Metabolism, Small Molecule Biochemistry	metabolism of eicosanoid	-2.101	-2.101	-2.101	-2.101	-2.319	0.088	2.101	2.101	0.966	0.19	1.3	2.101
	Lipid Metabolism, Molecular Transport, Small Molecule Biochemistry	uptake of lipid	-2.012	-2.012	-1.402	-1.212	-1.707	0.771	2.012	2.012	0.754	-0.03	1.555	2.012
	Lipid Metabolism, Molecular Transport, Small Molecule Biochemistry	transport of steroid	-2.176	-2.176	-1.633	-0.718	-1.633	-0.669	2.176	2.176	0.669	0.669	1.633	2.176
E	Amino Acid Metabolism, Small Molecule Biochemistry	metabolism of amino acids	-2.183	-2.183	-1.213	-2.183	-2.183	-2.183	2.183	2.183	2.183	2.183	2.183	2.183
	Amino Acid Metabolism, Post-Translational Modification, Small Molecule Biochemistry	conversion of amino acids	-2.236	-2.236	-1.342	-2.236	-2.236	-0.447	2.236	2.236	2.236	2.236	2.236	2.236
	Drug Metabolism, Lipid Metabolism, Small Molecule Biochemistry, Vitamin and Mineral Metabolism	metabolism of tretinoin	-2.23	-2.23	-2.23	-2.23	-2.23	-0.411	2.23	2.23	2.23	2.23	2.23	2.23
	Vitamin and Mineral Metabolism	metabolism of vitamin	-2.418	-2.418	-2.418	-1.866	-1.866	-0.064	2.418	2.418	2.418	2.418	2.418	2.418
	Lipid Metabolism, Small Molecule Biochemistry, Vitamin and Mineral Metabolism	metabolism of retinoid	-2.418	-2.418	-2.418	-1.866	-1.866	-0.064	2.418	2.418	2.418	2.418	2.418	2.418
	Lipid Metabolism, Small Molecule Biochemistry	fatty acid metabolism	-3.318	-3.318	-3.464	-2.138	-2.585	-0.275	3.318	3.611	1.643	1.11	2.382	2.927
	Lipid Metabolism, Molecular Transport, Small Molecule Biochemistry	flux of lipid	-2.904	-2.904	-2.904	-2.904	-1.55	-0.742	2.904	2.904	1.943	1.782	2.423	2.904
	Lipid Metabolism, Molecular Transport, Small Molecule Biochemistry	efflux of lipid	-2.744	-2.744	-2.744	-2.744	-1.349	-0.516	2.744	2.744	2.249	1.589	2.249	2.744
	Lipid Metabolism, Molecular Transport, Small Molecule Biochemistry	efflux of cholesterol	-2.575	-2.575	-2.575	-2.575	-1.109	-0.754	2.575	2.575	2.055	1.361	2.055	2.575
	Nucleic Acid Metabolism	metabolism of nucleic acid component or derivative	-2.719	-2.719	-2.719	-2.719	-1.86	-0.289	2.719	2.218	1.549	0.547	1.86	2.719
	Molecular Transport	transport of molecule	-2.846	-2.846	-3.101	-1.959	-1.559	0.326	2.846	2.846	2.245	1.183	2.718	2.579
	Cellular Movement, Hematological System Development and Function, Immune Cell Trafficking, Inflammatory Response	migration of phagocytes	-2.921	-2.921	-2.921	-2.921	-1.825	1.716	2.921	2.373	2.851	2.069	2.962	1.465
	Lipid Metabolism, Molecular Transport, Small Molecule Biochemistry	release of lipid	-3.471	-3.471	-3.471	-2.329	-1.416	1.827	3.471	3.471	2.71	1.796	3.471	2.558
	Organismal Development	size of body	-5.755	-5.755	-4.778	-5.489	-2.62	2.235	5.4	5.222	4.467	3.419	5.062	4.956
