# Supplementary material for: Deciphering the Developmental Dynamics of the Mouse Liver Transcriptome
Source: PLoS One. 2015 Oct 23;10(10):e0141220. doi: 10.1371/journal.pone.0141220 (PMC4619800; doi:10.1371/journal.pone.0141220)
Supplement: S17 Table — (XLSX) [file pone.0141220.s023.xlsx]

## Sheet: Sheet1
Upstream regulator distribution on moleculer type
	Prenatal and Neonatal		Prenatal and Adult		Neonatal		Neonatal and Adolescent		Adolescent and Adult		Adult
Type	Count	%	Count	%	Count	%	Count	%	Count	%	Count	%
transcription regulator	102	33.1169	13	25	59	23.0469	85	19.2308	28	20.8955	57	26.2673
enzyme	48	15.5844	17	32.6923	42	16.4062	84	19.0045	30	22.3881	51	23.5023
other	57	18.5065	9	17.3077	58	22.6562	96	21.7195	17	12.6866	45	20.7373
kinase	39	12.6623	4	7.69231	30	11.7188	42	9.50226	11	8.20896	10	4.60829
transporter	16	5.19481	2	3.84615	11	4.29688	30	6.78733	13	9.70149	16	7.37327
peptidase	10	3.24675	3	5.76923	11	4.29688	21	4.75113	6	4.47761	5	2.30415
transmembrane receptor	9	2.92208	0	0	14	5.46875	19	4.29864	7	5.22388	6	2.76498
ligand-dependent nuclear receptor	1	0.324675	1	1.92308	3	1.17188	19	4.29864	15	11.194	14	6.45161
growth factor	4	1.2987	0	0	9	3.51562	17	3.84615	1	0.746269	7	3.22581
phosphatase	10	3.24675	1	1.92308	5	1.95312	11	2.48869	2	1.49254	0	0
cytokine	4	1.2987	0	0	7	2.73438	5	1.13122	1	0.746269	2	0.921659
G-protein coupled receptor	2	0.649351	0	0	5	1.95312	6	1.35747	0	0	1	0.460829
translation regulator	5	1.62338	0	0	1	0.390625	3	0.678733	0	0	2	0.921659
ion channel	0	0	2	3.84615	0	0	3	0.678733	2	1.49254	0	0
group	0	0	0	0	1	0.390625	1	0.226244	0	0	1	0.460829
complex	1	0.324675	0	0	0	0	0	0	1	0.746269	0	0
